# Supplementary material for: The economic burden of visual impairment and blindness: a systematic review
Source: PubMed Central journal article supplement — BMJ Open. 2013 Nov 6;3(11):e003471. doi: 10.1136/bmjopen-2013-003471 (PMC3822298; doi:10.1136/bmjopen-2013-003471), 2013-11-06
Supplement: bmjopen-2013-003471.draft_revisions.pdf [file bmjopen-2013-003471.draft_revisions.pdf]

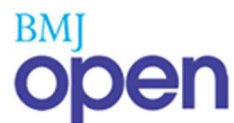

**THE ECONOMIC BURDEN OF SEVERE VISUAL IMPAIRMENT  
AND BLINDNESS - A Systematic Review**

|                                    |                                                                                                                                                     |
|------------------------------------|-----------------------------------------------------------------------------------------------------------------------------------------------------|
| Journal:                           | <i>BMJ Open</i>                                                                                                                                     |
| Manuscript ID:                     | bmjopen-2013-003471                                                                                                                                 |
| Article Type:                      | Research                                                                                                                                            |
| Date Submitted by the Author:      | 28-Jun-2013                                                                                                                                         |
| Complete List of Authors:          | Köberlein, Juliane; University of Wuppertal,<br>Beifus, Karolina<br>Schaffert, Corinna<br>Finger, Robert; University of Bonn, Dept of Ophthalmology |
| <b>Primary Subject<br>Heading</b>: | Ophthalmology                                                                                                                                       |
| Secondary Subject Heading:         | Health economics                                                                                                                                    |
| Keywords:                          | visual impairment, blindness, cost of illness, HEALTH ECONOMICS                                                                                     |
|                                    |                                                                                                                                                     |

SCHOLARONE™  
Manuscripts

# THE ECONOMIC BURDEN OF SEVERE VISUAL IMPAIRMENT AND BLINDNESS - A Systematic Review

*Juliane Köberlein<sup>1\*</sup>, Karolina Beifus<sup>1\*</sup>, Corinna Schaffert<sup>1</sup>, Robert P. Finger<sup>2</sup>*

Contact Address:

Juliane Köberlein, PhD

Karolina Beifus

Department of Health Economics und Health Care Management

University of Wuppertal

Rainer-Gruenter-Str. 21

42119 Wuppertal

Tel: +49 (0)202 439 1388

Fax: +49 (0)202 439 1384

e-mail: koeberlein@wiwi.uni.wuppertal.de

<sup>1</sup>Department of Health Economics und Health Care Management

University of Wuppertal

Germany

<sup>2</sup>University of Bonn

Department of Ophthalmology

Germany

and

University of Melbourne

Centre of Eye Research Australia

Royal Victorian Eye and Ear Hospital

Australia

\*JK and KB contributed equally to this article

**Keywords:** visual impairment, blindness, costs of illness, health economics

**Word Count:** 3450

## ABSTRACT

### Objectives

Visual impairment and blindness (VI&B) cause a considerable and increasing economic burden in all high income countries due to population ageing. Thus we conducted a review of the literature to better understand all relevant costs associated with VI&B and to develop a multi-perspective overview.

### Design

Systematic review. Two independent reviewers searched relevant literature and assessed studies for inclusion and exclusion criteria as well as quality aspects

### Eligibility criteria for included studies

Interventional, non-interventional and cost of illness studies, conducted prior May 2012 investigation direct and indirect costs as well as intangible effects related to visual impairment and blindness, were included.

### Methods

We followed the PRISMA statement approach to identify relevant studies. A meta-analysis was not performed, due to the variability of reported cost categories.

### Results

A total of 22 studies were included. Hospitalization and use of medical services around diagnosis and treatment at the onset of VI&B were the largest contributor to direct medical costs. Mean annual expenses were found to be US\$ PPP 12,175-14,029 for moderate visual impairment, US\$ PPP 13,154-16,321 for severe visual impairment, and US\$ PPP 14,882-24,180 for blindness, almost twofold the costs for non-blind patients. Informal care was the major contributor to other direct costs, with the time spent by caregivers increasing from 5.8 hours/week (or US\$ PPP 263) for persons vision > 20/32 up to 94.1 hours/week (or US\$ PPP 55,062) for persons with vision ≤ 20/250. VI&B caused considerable indirect costs due to productivity losses, premature mortality, and dead weight losses.

### Conclusions

VI&B cause a considerable economic burden for affected persons, their care givers and society at large, which increases with the degree of visual impairment. This review provides insight into the distribution of costs and the economic impact of VI&B.

## ARTICLE SUMMARY

### Article Focus

- To explore all relevant costs associated with visual impairment and blindness.

### Key Message

- We could demonstrate a considerable impact of visual impairment and blindness in terms of the associated direct and indirect costs, as well as intangible effects such as loss of well-being, independence and excess mortality.
- A large proportion of the direct costs reported in reviewed studies are not directly related to eye-related medical care, but to falls and other accidents due to visual impairment, exacerbation of diabetes due to a reduced ability to self-manage, depression related to loss of vision and further excess morbidity.
- All identified costs as well as intangible effects correlated with the degree of visual impairment with highest expenditures associated with blindness.

### Strengths and limitations

- This is the first review exploring an international and multi-perspective overview of costs and intangible effects associated with visual impairment as well as blindness.
- The study synthesis of reviewed literature was limited as no two studies used the same methodology, reported exactly the same outcomes or used the same sample population. Therefore a meta-analysis was not conducted.

## INTRODUCTION

Visual impairment and blindness are foremost a problem of older age in all high-income countries, and constantly increasing due to the ageing of populations in these countries [1]. Globally, the burden of disease related to vision disorders has increased by 47% from 12,858,000 Disability Adjusted Life Years (DALYs) in 1990 to 18,837,000 DALYs in 2010 [2]. Health-related quality of life in severely visually impaired persons has been shown to be similar or even lower and emotional distress higher compared with other serious chronic health conditions such as stroke or metastasised solid tumours [3]. Blindness and visual impairment impact not only the affected individual but also the family, caregivers and the community, leading to a significant cost burden. In Australia, the overall cost placed visual disorders seventh among diseases, ahead of coronary heart disease, diabetes, depression, and stroke in terms of economic burden on the health system [4].

As demands on healthcare continue to increase in all high-income countries, economic evaluations of disease, impairment and interventions have also become increasingly important [5]. This necessitates a clear understanding of all aspects of the direct and indirect costs and intangible effects related to blindness and severe visual impairment, as almost all interventions in this area are aiming to prevent these and are often measured as an incremental cost effectiveness ratio (ICER), i.e. the difference in cost compared to the difference in effectiveness. Similarly, faced with increasing demand and limited resources in healthcare, these resources need to be prioritized which again calls for a clear understanding of the economic impact of a disease or disorder. Against this background we conducted a systematic review of the literature, collating all data available on the economic impact of visual impairment and blindness.

## METHODS

### Literature search

All economical and medical databases were searched from May to June 2012 via PubMed and OVID using the following terms:

*“low vision”, “visual impairment”, “visually impaired”, “blindness”, “blind”, “visual loss”, “costs”, “costs of illness”.*

Subsequently, a second search was conducted using the main causes of visual impairment and blindness. Search terms were: *“low vision”, “visual impairment”, “visually impaired”, “blindness”, “blind”, “visual loss”, “costs”* combined with *“age-related macular degeneration”, “glaucoma”, “diabetic retinopathy”, “cataract”, “corneal opacities”, “childhood blindness”* separated by *“or”*.

1  
2  
3 Supplemental sources including references contained in identified articles were used in addi-  
4 tion.

5  
6 Two independent researchers screened identified articles using the following inclusion or  
7 exclusion criteria:

8  
9 Inclusion:

- 10 - data for direct and indirect costs related to visual impairment and blindness,
- 11 - studies with outcomes related to intangible effects due to visual impairment and
- 12 blindness,
- 13 - overall data for burden of illness related to affected persons and carers.

14  
15  
16 Exclusion:

- 17 - costs pertaining to underlying diseases only with no specification of visual impairment
- 18 levels,
- 19 - economic studies conducted in developing countries.

#### 20 21 22 23 24 25 Data extraction strategy & cost classification

26 All included articles were assessed as to which cost aspects they reported. Broadly, costs  
27 were divided into direct costs, indirect costs, and intangible effects [6].

28  
29 Direct costs are defined as the actual expenses related to an illness and contain medical  
30 costs, non-medical costs and other direct costs [5]. Medical costs measure the cost of re-  
31 sources used for treating a particular illness. Non-medical costs are costs caused by the dis-  
32 ease but not attributed to medical treatment. In case of visual impairment and blindness the-  
33 se are supporting services, assistive devices, home care, residential care or transportation  
34 (travel expenses). Other direct costs comprise informal care, time spent in treatment by pa-  
35 tients or caregivers, or time spent in rehabilitation, training, self-help groups or preventative  
36 activities [5].

37  
38 Indirect costs are defined as the value of lost output caused by reduced productivity due to  
39 illness or disability [7]. Both, patients and caregivers are affected by indirect costs due to  
40 allowances (financial support for income, residence, benefits), productivity losses (absentee-  
41 ism, salary losses, part-time employment, loss of work), and dead weight losses or years of  
42 life lost.

43  
44 Intangible costs or effects refer to the burden of illness of affected persons and caregivers,  
45 and comprise loss of well being or loss of quality of life. It can be captured using question-  
46 naires and expressed in DALYs. As this aspect of costs is difficult to quantify, DALYs or other  
47 measures of intangible effects are rarely assigned a monetary value.

48  
49 Commonly, cost categories considered in a particular study depend on the perspective the  
50 study is conducted from, i.e. a healthcare payer's (direct costs only) or the patient's perspec-  
51  
52  
53  
54  
55  
56  
57  
58  
59  
60

1  
2  
3 tive, or a societal perspective (all costs). Cost-of-illness – or in this case cost-of-impairment –  
4 studies can be divided into disease-specific and general studies. Both types of studies were  
5 included if they contained relevant data.  
6  
7

### 8 9 Quality of included studies

10 A checklist, based on the assessment tool of Emmert and colleagues [8] and extended by  
11 several questions covering relevant cost-of-illness aspects (see **Appendix 1**), was generated  
12 to assess the overall quality of included studies. The checklist contained sections on the  
13 study design, population, definition and specification of cost data and its limitations, including  
14 a total of 25 questions. Studies were rated from 0 – 100 for each of these categories. Two  
15 independent reviewers conducted the assessment and interrater-reliability was assessed  
16 using Kappa ( $\kappa_n$ ) as suggested by Brennan and Prediger [9] for every study. The interpreta-  
17 tion of agreement was based on the agreement scale by Landis and Koch [10].  
18  
19  
20  
21  
22  
23

### 24 Conversion of Cost-of-illness study results

25 For better comparison of costs across studies, the data were transformed: (1) costs were  
26 inflated to 2011 using country specific gross domestic product deflator, which takes fluctuat-  
27 ing exchange rates, different purchasing power of currencies and the rate of inflation into  
28 account [11], and (2) converted to USD using purchasing power parities (PPP) [12]. Purchas-  
29 ing power parities account for differences in price levels between countries, and convert local  
30 currencies into international dollars taking purchasing power of different national currencies  
31 into account and eliminating differences in price levels between countries. The transformed  
32 values are presented in million units (million US\$-PPP) for total expenditures reported and in  
33 US\$-PPP for costs per person.  
34  
35  
36  
37  
38  
39  
40

## 41 RESULTS

42  
43 The search yielded a total of 389 articles. After applying all inclusion and exclusion criteria,  
44 22 studies were included in the systematic review (**Figure 1**). Altogether there were eight  
45 studies conducted in the USA, six studies conducted in Australia, two studies from France,  
46 and one study from each of the following countries: Germany, Canada, the UK, Japan, India  
47 and one study with a global perspective. All included studies are summarized in **Table 1**.  
48  
49  
50  
51  
52  
53  
54  
55  
56  
57  
58  
59  
60

Table 1: Characteristics of included studies

| Author                                                                | Country   | Design and Population                                                                                                                                                                                                                                                                                                                                                                                                      | Cost components evaluated                                                          | Objective                                                                                                                                       | Vision categories                                                                         |
|-----------------------------------------------------------------------|-----------|----------------------------------------------------------------------------------------------------------------------------------------------------------------------------------------------------------------------------------------------------------------------------------------------------------------------------------------------------------------------------------------------------------------------------|------------------------------------------------------------------------------------|-------------------------------------------------------------------------------------------------------------------------------------------------|-------------------------------------------------------------------------------------------|
| Bramley et al. 2008 [13]                                              | USA       | retrospective cohort analysis of nationally representative Medicare 5% random sample; patients older than 65 years with newly diagnosed glaucoma; regression analysis                                                                                                                                                                                                                                                      | direct medical costs, intangible effects                                           | to measure costs of visual impairment due to progressing glaucoma                                                                               | no vision loss, moderate vision loss, severe vision loss, blindness                       |
| Brezin et al. 2005 [14]                                               | France    | national survey of a random stratified sample; 16, 945 affected persons answered questionnaires; 4,091 caregiver answered questionnaires;                                                                                                                                                                                                                                                                                  | indirect costs; intangible effects                                                 | to document the prevalence of self-reported visual impairment and its association with disabilities, handicaps, and socioeconomic consequences. | blind or light perception only, low vision, other visual problems, and no visual problems |
| Chou et al. 2006 [15]                                                 | Australia | 150 persons completed cost diaries for 12 months and were evaluated; costs categorized into four sections: 1. medicines, products and equipment, 2. health and community services, 3. informal care and support, 4. other expenses                                                                                                                                                                                         | direct medical costs, direct non-medical costs                                     | to describe and evaluate the process used to collect personal costs (out-of-pocket) associated with vision impairment using diaries             | ≥ 6/12with restricted fields; <6/12-6/18; <6/18-6/60; <6/60-3/60; <3/60                   |
| Clarke et al. 2003 [16]                                               | UK        | regression-based approach to estimate the short-term and long-term annual hospital and non-hospital costs associated with seven major diabetes-related complications in the UK Prospective Diabetes Study (UKPDS): myocardial infarction (MI); stroke, angina or ischemic heart disease (IHD); heart failure; blindness in one eye; amputation and cataract extraction; 5102 patients with newly diagnosed type 2 diabetes | direct medical costs                                                               | to estimate the immediate and long-term health-care costs associated with seven diabetes-related complications                                  | blind in one eye                                                                          |
| Cruess et al. 2011 [17] (in combination with Gordon et al. 2011 [18]) | Canada    | prevalence-based approach, population projections for the whole population were compiled using data from the Statistics Canada 2006 Population Projections for Canada, Provinces and Territories 2001-2031                                                                                                                                                                                                                 | direct medical costs, direct non medical costs, indirect costs, intangible effects | to investigate costs of vision loss in Canada to inform healthcare planning                                                                     | no details                                                                                |
| Frick et al. 2008 [19]                                                | USA       | retrospective cohort study; patients with blindness matched to non-blind selected from managed care claims database                                                                                                                                                                                                                                                                                                        | direct medical costs                                                               | to evaluate total and condition related charges incurred by blind patients in a managed care population in the                                  | blind, non blind                                                                          |



|                          |           |                                                                                                                                                                                                                                          |                                                              |                                                                                                                                                                                     |                                                                                                |
|--------------------------|-----------|------------------------------------------------------------------------------------------------------------------------------------------------------------------------------------------------------------------------------------------|--------------------------------------------------------------|-------------------------------------------------------------------------------------------------------------------------------------------------------------------------------------|------------------------------------------------------------------------------------------------|
|                          |           |                                                                                                                                                                                                                                          |                                                              | US                                                                                                                                                                                  |                                                                                                |
| Javitt et al. 2007 [20]  | USA       | retrospective cohort analysis of nationally representative Medicare 5% random sample, excluding Medicare managed-care enrollees                                                                                                          | direct medical costs                                         | to assess and identify the costs to the Medicare program for patients with either stable or progressive vision loss and estimate the impact on eye-related and non-eye related care | mild, moderate, severe vision loss (VA $\leq$ 20/200), blindness (VA $\leq$ 20/400)            |
| Keeffe et al. 2009 [21]  | Australia | 114 participants of the Melbourne Visual Impairment Project completed diaries for 12 month; the burden of caregiver and opportunity costs for losses in work time was calculated (in combination with methods and data from Chou et.al.) | other direct costs                                           | to analyse prospective data on providers, types and costs of care for people with impaired vision in Australia                                                                      | VA < 20/40                                                                                     |
| Kymes et al. 2010 [22]   | USA       | decision analytic approach; Markov model to replicate health events over the remaining lifetime of someone newly diagnosed with glaucoma                                                                                                 | incremental costs of illness                                 | to evaluate the incremental cost of primary open-angle glaucoma considering both visual and non-visual medical costs over a lifetime                                                | no details                                                                                     |
| Lafuma et al. 2006 [23]  | France    | interviews with sample population (665,000) from a national survey of persons living in institutions or in the community (with caregiver at home)                                                                                        | direct non medical costs, other direct costs, indirect costs | to estimate the annual national non medical costs due to visual impairment and blindness                                                                                            | blind (light perception), low vision (better than light perception??, low vision, and controls |
| McCarty et al. 2001 [24] | Australia | population-based study; evaluation of the data from Melbourne Visual impairment project; population $\geq$ 40 years was analyzed in causes of death                                                                                      | intangible effects                                           | to describe predictors of mortality in the 5 year follow up of Melbourne Visual impairment project;                                                                                 | visual acuity < 6/12                                                                           |
| Morse et al. 1999 [25]   | USA       | 2.552.350 discharges from hospital in state of NY -> 5.764 patients had visual impairment                                                                                                                                                | direct medical costs                                         | to assess whether visual impairment contributes to average length of stay within inpatient care facilities                                                                          | no details                                                                                     |
| Porz et al. 2010 [26]    | Germany   | retrospective study of 66 patients using a cost and a vision-related quality of life questionnaire (Impact of vision Impairment questionnaire)                                                                                           | direct non medical costs, intangible ef-                     | to capture costs for medicines, aids and equipment, support in everyday                                                                                                             | Visual acuity (VA) $\geq$ 0,3, Visual acuity < 0,3                                             |

|                          |           |                                                                                                                                                                                |                                                                                           |                                                                                                                                                                                |                                                                                                                                          |
|--------------------------|-----------|--------------------------------------------------------------------------------------------------------------------------------------------------------------------------------|-------------------------------------------------------------------------------------------|--------------------------------------------------------------------------------------------------------------------------------------------------------------------------------|------------------------------------------------------------------------------------------------------------------------------------------|
|                          |           |                                                                                                                                                                                | fects                                                                                     | life and social benefits, as well as vision- related quality of life                                                                                                           |                                                                                                                                          |
| Rein, et al. 2006 [27]   | USA       | private insurance and Medicare claims data                                                                                                                                     | direct non medical costs, indirect costs                                                  | to estimate the societal economic burden and the governmental budgetary impact of the following visual disorders among US adults aged 40 years and older:                      | refractive errors                                                                                                                        |
| Roberts et al. 2010 [28] | Japan     | prevalence-based approach; adopted using data on visual impairment, the national health system, and indirect costs                                                             | direct medical costs, direct non medical costs, other direct costs and intangible effects | to quantify the total economic cost of visual impairment in Japan                                                                                                              | low vision 6/12-6/60;<br>blind < 6/60;<br>visual impairment = >6/12                                                                      |
| Schmier et al. 2009 [29] | USA       | using a questionnaire that included items on demographic and clinical characteristics and on the use of services, assistive devices, and caregiving; 761 persons were included | direct non medical costs, other direct costs                                              | to assess the use of devices and caregiving among individuals with diabetic retinopathy and to evaluate the impact of visual acuity on use                                     | group 1 (20/20 or better),<br>group 2 (20/ 25–20/30),<br>group 3 (20/40–20/50),<br>group 4 (20/60–20/70), or<br>group 5 (20/80 or worse) |
| Schmier et al. 2006 [30] | USA       | survey with interviews on Daily Living Tasks Dependent on Vision Questionnaire;803 respondents                                                                                 | other direct costs,                                                                       | to assess the patient-reported use of caregiving among individuals with age-related macular degeneration (AMD) and evaluation of impact of visual impairment level on this use | 1. VA > 20/32;<br>2. VA 20/32 - > 20/50;<br>3. VA 20/50 - >20/80;<br>4. VA 20/80 - > 20/150;<br>5. 20/150 - >20/250;<br>6. VA ≤ 20/250   |
| Vu, et al. 2005 [31]     | Australia | stratified random sample of 3040 participants from the Melbourne Visual Impairment Project; 2530 attended the follow-up study                                                  | intangible effects                                                                        | to investigate whether unilateral vision loss reduces any aspects of quality of life in comparison with normal vision                                                          | unilateral and bilateral vision loss (correctable and non-correctable)                                                                   |

|                          |           |                                                                                                                                                                                                                                           |                                                            |                                                                                                                                                                         |                                                                               |
|--------------------------|-----------|-------------------------------------------------------------------------------------------------------------------------------------------------------------------------------------------------------------------------------------------|------------------------------------------------------------|-------------------------------------------------------------------------------------------------------------------------------------------------------------------------|-------------------------------------------------------------------------------|
| Wong et al. 2008<br>[32] | Australia | prospective cohort study; participants of any age to complete a diary for 12 months answering four categories: 1) medicines, products and equipment, 2) health and community services, 3) informal care and support and 4) other expenses | direct costs (medical and non medical), other direct costs | to determine the personal out-of-pocket costs of visual impairment and to examine the expenditure pattern related to eye diseases and the severity of visual impairment | visual acuity $\geq 6/18$ with constricted. fields;<br>< 6/18-6/60;<br>< 6/60 |
| Wood et al. 2011<br>[33] | Australia | 76 community-dwelling individuals with a range of severity of AMD; completing a diary for 12 month                                                                                                                                        | intangible effects; costs of adverse events                | to explore the relationship between AMD, fall risk, and other injuries and identified visual risk factors for these adverse events                                      | binocular visual acuity, contrast sensitivity, and merged visual fields       |

1  
2  
3 All studies were rated above 50 for all four main quality aspects, indicating a sufficient level  
4 of quality, and consequently were included into the review (see **Figure 2**). The interrater-  
5 reliability was consistently high and only a few discrepancies had to be settled by a discus-  
6 sion between the two raters. Kappa scores ranged from 0.34 to 0.76 (**Figure 3**).  
7  
8  
9

10 Of all included studies eleven captured direct medical cost, seven direct non-medical costs,  
11 and six other direct costs. Seven studies report data on indirect costs and ten on intangible  
12 effects. All cost components reported by studies within each cost category are summarized  
13 in **Appendix 2**, highlighting the considerable variability in obtaining and reporting cost as-  
14 pects related to visual impairment and blindness between all studies.  
15  
16  
17  
18  
19

### 20 Direct medical costs

21 Direct medical costs occurred mostly due to hospitalization, the use of medical services and  
22 medical products, and were reported either as incremental costs or, in some studies, provid-  
23 ed as the length of hospital stay (**Table 2**).  
24  
25

26 At the onset of visual impairment and blindness, the two major contributors to direct medical  
27 costs are hospitalizations and costs due to increased use of medical services around diag-  
28 nosis and treatment [16, 17, 19, 25, 28]. Costs related to recurrent hospitalizations and ongo-  
29 ing, but less frequent use of medical services, remain major cost components in persons with  
30 visual impairment and blindness in the long term. Costs related to drugs, however, did not  
31 emerge as a major direct cost factor [15, 32]. All identified costs correlated with the degree of  
32 visual impairment leading to the highest expenditures being associated with blindness. The  
33 considerable differences in study methods and reported outcomes makes a head to head  
34 comparison of results by study or country or aggregation of data in terms of met-analyses for  
35 direct medical costs very difficult. Several studies based on representative samples of Medi-  
36 care beneficiaries in the USA reported mean annual expenses to be US\$ PPP 12,175-  
37 14,029 for moderate visual impairment, US\$ PPP 13,154-16,321 for severe visual impair-  
38 ment, and US\$ PPP 14,882-24,180 for blindness, which is almost a 100% excess of the es-  
39 timated mean annual cost for non-blind patients at the upper end of the range (**Table 2**).  
40  
41  
42  
43  
44  
45  
46  
47  
48  
49  
50  
51  
52  
53  
54  
55  
56  
57  
58  
59  
60

Table 2: Outcomes for direct medical costs.

| <i>Study</i>                      | <i>cost outcomes</i>                                                                                                                                 | <i>US\$ PPP in 2011</i> |
|-----------------------------------|------------------------------------------------------------------------------------------------------------------------------------------------------|-------------------------|
| Bramley et al. 2008 <sup>11</sup> | annual costs per patient compared in degrees of vision impairment from no vision loss and onset of moderate or severe vision impairment or blindness |                         |
|                                   | no vision loss <b>US\$ 8,157</b>                                                                                                                     | <b>8,695</b>            |
|                                   | moderate visual impairment <b>US\$13,162</b>                                                                                                         | <b>14,029</b>           |
|                                   | severe visual impairment <b>US\$ 15,312</b>                                                                                                          | <b>16,321</b>           |
|                                   | blindness <b>US\$ 18,670</b>                                                                                                                         | <b>19,900</b>           |
| Frick et al. 2008 <sup>17</sup>   | cohort with legally blind patients matched to equal sample cohort with non-blind patients (annual costs per patient in the first year)               |                         |
|                                   | blind persons mean costs <b>US\$ 20,677</b>                                                                                                          | <b>24,180</b>           |
|                                   | median costs <b>US\$ 6,854</b>                                                                                                                       | <b>8,015</b>            |
|                                   | non blind mean costs <b>US\$ 13,321</b>                                                                                                              | <b>15,578</b>           |
|                                   | median costs <b>US\$ 371</b>                                                                                                                         | <b>434</b>              |
| Javitt et al. 2007 <sup>18</sup>  | patients with normal vision compared to moderate or severe visual impairment or blindness regarding eye-related and non-eye-related care             |                         |
|                                   | mean annual costs for eye-related care                                                                                                               |                         |
|                                   | normal vision <b>US\$ 370</b>                                                                                                                        | <b>445</b>              |
|                                   | moderate visual impairment <b>US\$ 345</b>                                                                                                           | <b>415</b>              |
|                                   | severe visual impairment <b>US\$ 407</b>                                                                                                             | <b>490</b>              |
|                                   | blindness <b>US\$ 237</b>                                                                                                                            | <b>285</b>              |
|                                   | mean annual values for non eye related costs                                                                                                         |                         |
|                                   | normal vision <b>US\$ 7,928</b>                                                                                                                      | <b>9,537</b>            |
|                                   | moderate visual impairment <b>US\$ 2,193</b>                                                                                                         | <b>2,638</b>            |
|                                   | severe visual impairment <b>US\$ 3,301</b>                                                                                                           | <b>3,971</b>            |
|                                   | blindness <b>US\$ 4,443</b>                                                                                                                          | <b>5,345</b>            |
| Kymes et al. 2010 <sup>20</sup>   | lifetime costs of POAG (primary open-angle glaucoma) to non POAG patients                                                                            |                         |
|                                   | incidence costs <b>US\$ 41,039</b>                                                                                                                   | <b>46,456</b>           |
|                                   | prevalence costs <b>US\$ 19,268</b>                                                                                                                  | <b>21,811</b>           |
|                                   | drug costs <b>US\$ 7,098</b>                                                                                                                         | <b>8,035</b>            |
|                                   | incremental incidence costs <b>US\$ 27,326</b>                                                                                                       | <b>30,933</b>           |
|                                   | incremental prevalence costs <b>US\$ 5,555</b>                                                                                                       | <b>6,288</b>            |
|                                   | incremental drug costs <b>US\$ 4,179</b>                                                                                                             | <b>4,731</b>            |
| Morse et al. 1999 <sup>23</sup>   | extension of average length of stay in hospitals due to visual impairment                                                                            |                         |
|                                   | <b>5.2 days</b> longer stay                                                                                                                          |                         |
| Cruess et al. 2011 <sup>15</sup>  | financial burden of vision loss to Canadian health care system                                                                                       |                         |
|                                   | hospital <b>CAN\$ 1,497.7 million</b>                                                                                                                | <b>1,934.72 million</b> |
|                                   | physicians <b>CAN\$ 866.5 million</b>                                                                                                                | <b>1,119.34 million</b> |
|                                   | vision care <b>CAN\$ 3,483.7 million</b>                                                                                                             | <b>4,500.24 million</b> |
| Chou et al. 2006 <sup>13</sup>    | the out-of-pocket expenses for medicines and products per person annually                                                                            |                         |
|                                   | <b>AUS \$ 206</b>                                                                                                                                    | <b>456</b>              |
| Wong et al. 2008 <sup>30</sup>    | annual costs for medicine and products per patient                                                                                                   |                         |
|                                   | Visual acuity (VA) $\geq$ 6/18 with restr. field <b>AUS\$ 285</b>                                                                                    | <b>632</b>              |
|                                   | < 6/18 – 6/60 = <b>AUS\$ 233</b>                                                                                                                     | <b>516</b>              |
|                                   | < 6/60 = <b>AUS\$ 147</b>                                                                                                                            | <b>326</b>              |
| Clarke et al. 2003 <sup>14</sup>  | short-term and long-term annual hospital and non-hospital costs due to major diabetes-related complications                                          |                         |
|                                   | blindness in one eye (in 20% of patients) <b>£ 4,370</b>                                                                                             | <b>4,086</b>            |
|                                   | mean hospital in-patient costs <b>£ 872</b>                                                                                                          | <b>815</b>              |
| Roberts et al. 2010 <sup>26</sup> | total economic costs of visual impairment                                                                                                            |                         |
|                                   | General medical expenditure <b>US\$ 8.102 billion</b>                                                                                                | <b>8,636 million</b>    |
|                                   | Inpatient <b>US\$ 1.808 billion</b>                                                                                                                  | <b>1,927 million</b>    |
|                                   | Outpatient <b>US\$ 6.294 billion</b>                                                                                                                 | <b>6,709 million</b>    |
|                                   | Drugs <b>US\$ 1.395 billion</b>                                                                                                                      | <b>1,487 million</b>    |

## Direct non medical costs

Assistive devices and aids, home modifications, costs for health care services like home-based nursing or nursing home placements were the major contributors to direct non-medical costs (**Table 3**). With worsening visual acuity direct non-medical costs for support services and assistive devices increased, from US\$ PPP 53.90 for a person with visual acuity  $\geq 20/20$  up to US\$ PPP 608.71 for a person with visual acuity  $\leq 20/80$  [29]. Nursing home-placements and professional care costs incurred the highest expenditures followed by domestic modifications. These costs however, were highest initially shortly after the loss of vision and in the majority only a one-off (**Table 3**).

Table 3: Outcomes for direct non medical costs.

| Study                             | cost outcomes                                                                                                                                                                                               | US\$ PPP in 2011             |                   |                  |
|-----------------------------------|-------------------------------------------------------------------------------------------------------------------------------------------------------------------------------------------------------------|------------------------------|-------------------|------------------|
| Rein et al. 2006 <sup>25</sup>    | total annual costs for visual impairment and blindness for adults $\geq 40$ years                                                                                                                           |                              |                   |                  |
|                                   | nursing placements of <b>US\$ 10.96 billion</b>                                                                                                                                                             | 12,818 million               |                   |                  |
|                                   | guide dogs <b>US\$ 0.062 billion</b>                                                                                                                                                                        | 72.5 million                 |                   |                  |
|                                   | independent living <b>US\$ 0.029 billion</b>                                                                                                                                                                | 33.9 million                 |                   |                  |
| Schmier et al. 2009 <sup>27</sup> | annual costs for use of services and devices related to the degree of visual impairment per person                                                                                                          |                              |                   |                  |
|                                   | devices (glasses, sticks, computer software, etc.) <b>US\$ 109.79</b>                                                                                                                                       | 120                          |                   |                  |
|                                   | rehabilitation <b>US\$ 7.09</b>                                                                                                                                                                             | 7.78                         |                   |                  |
| Chou et al. 2006 <sup>13</sup>    | annual costs for health and community services per person<br>health care, home help, personal affairs, personal care, communication,<br>transport, social activities <b>AUS \$ 872</b>                      | 1,932.50                     |                   |                  |
|                                   | expenditure for taxi, public transport, education expenses, guide dog <b>AUS \$ 321</b>                                                                                                                     | 711                          |                   |                  |
|                                   |                                                                                                                                                                                                             |                              |                   |                  |
| Cruess et al. 2011 <sup>15</sup>  | financial burden of vision loss to Canadian health care system                                                                                                                                              |                              |                   |                  |
|                                   | care costs <b>CAN\$ 693 million</b>                                                                                                                                                                         | 895.21 million               |                   |                  |
|                                   | aids and modification <b>CAN\$ 305 million</b>                                                                                                                                                              | 394 million                  |                   |                  |
| Wong et al. 2008 <sup>30</sup>    | annual personal costs for health and community services and other expenses per patient                                                                                                                      |                              |                   |                  |
|                                   | median total costs <b>AUS\$ 1,768</b>                                                                                                                                                                       | 3,919                        |                   |                  |
|                                   | mean total costs <b>AUS \$ 3,376</b>                                                                                                                                                                        | 7,482                        |                   |                  |
| Roberts et al. 2010 <sup>26</sup> | total economic costs of visual impairment                                                                                                                                                                   |                              |                   |                  |
|                                   | meal service on admission <b>US\$ 0.149 billion</b>                                                                                                                                                         | 158.81 million               |                   |                  |
|                                   | home-visit nursing <b>US\$ 0.013 billions</b>                                                                                                                                                               | 13.86 million                |                   |                  |
|                                   | health care administration <b>US\$ 0.475 billion</b>                                                                                                                                                        | 506.30 million               |                   |                  |
|                                   | Community care <b>US\$ 6.608 billion</b>                                                                                                                                                                    | 7,043 million                |                   |                  |
|                                   | Institutional care <b>US\$ 0.238 billion</b>                                                                                                                                                                | 253.68 million               |                   |                  |
| Porz et al. 2010 <sup>24</sup>    | financial and psychological burden of retinal diseases divided into health economic relevant categories; annual expenses per person                                                                         |                              |                   |                  |
|                                   | aids for VA $\geq 0.3 = \text{€ } 96.65$                                                                                                                                                                    | 77.39                        |                   |                  |
|                                   | VA $< 0.3 = \text{€ } 83.58$                                                                                                                                                                                | 66.92                        |                   |                  |
|                                   | personal assistance VA $\geq 0.3 = \text{€ } 454.96$                                                                                                                                                        | 364.28                       |                   |                  |
| Lafuma et al. 2006 <sup>21</sup>  | national survey with estimation on costs of low vision and blindness for persons living in institutions <sup>1</sup> or in the community <sup>2</sup> (declared annually per person and total expenditures) |                              |                   |                  |
|                                   | <b>low vision</b>                                                                                                                                                                                           | <b>blindness</b>             | <b>low vision</b> | <b>blindness</b> |
|                                   | home modifications <sup>1</sup> <b>€ 36.65 pp/ year</b>                                                                                                                                                     | <b>€ 926.96 pp/ y</b>        | 37.87             | 957.90           |
|                                   | <b>€ 3.27 million total</b>                                                                                                                                                                                 | <b>€ 9.63 million total</b>  | 3.375 million     | 9.95 million     |
|                                   | devices <sup>1</sup> <b>€ 184.14 pp/ year</b>                                                                                                                                                               | <b>€ 387.35 pp/ y</b>        | 190.29            | 400.28           |
|                                   | <b>€ 16.43 million total</b>                                                                                                                                                                                | <b>€ 4.03 million total</b>  | 16.98 million     | 4.165 million    |
|                                   | home modification <sup>2</sup> <b>€ 42.23 pp/ y</b>                                                                                                                                                         | <b>€ 121.12 pp/y</b>         | 43.64             | 125.16           |
|                                   | <b>€ 16.43 million total</b>                                                                                                                                                                                | <b>€ 7.02 million total</b>  | 16.98 million     | 7.25 million     |
|                                   | devices <sup>2</sup> <b>€ 376.39</b>                                                                                                                                                                        | <b>€ 363.14 pp/ y</b>        | 388.95            | 375.26           |
|                                   | <b>€ 420 million total</b>                                                                                                                                                                                  | <b>€ 21.04 million total</b> | 434.02 million    | 21.74 million    |
|                                   | paid assistance <sup>2</sup> <b>€ 1,463.59 pp/ y</b>                                                                                                                                                        | <b>€ 6750.66 pp/ y</b>       | 1,512.44          | 6,976            |
|                                   | <b>€ 1,635 million</b>                                                                                                                                                                                      | <b>€ 391 million total</b>   | 1,690 million     | 404 million      |

### Other direct costs

Six of the included studies reported costs caused by informal care. Time spent on caring for or assisting visually impaired persons was related to the degree of visual impairment, with blind persons requiring the most assistance. The time spent by caregivers ranged from 5.8 hours per week for a person with a visual acuity of > 20/32 and a cost of US\$ PPP 263 up to 94.1 hours per week and costs of US\$ PPP 55,062 for persons with a visual acuity of ≤ 20/250 [30]. All studies differed slightly as to the nature of direct costs assessed. Some studies reported on governmental, out-of-pocket expenses as well as opportunity costs, others considered only one or two of these. The wide range of time and resources spent on informal care provision demonstrates the broad economic impact and considerable burden of informal care provision with concurrent expenses at a personal and societal level. Again, reported cost aspects and methodologies differ considerably, with, for example, Keeffe and colleagues[21] reporting out-of-pocket expenses and Lafuma and colleagues[23] reporting time spent on caring using an hourly rate. The multitude of differing approaches in each study does not allow for a head-to-head comparison but gives a comprehensive impression of the complex cost situation and highlights the importance of providing assistance to visually impaired and blind persons (**Table 4**).

Table 4: Outcomes for other direct costs.

| Study                             | cost outcomes                                                                                                                                                                       |                            | US\$ PPP in 2011     |                    |
|-----------------------------------|-------------------------------------------------------------------------------------------------------------------------------------------------------------------------------------|----------------------------|----------------------|--------------------|
| Schmier et al. 2009 <sup>27</sup> | annual costs for caregiver time spent in supporting patients with macular degeneration                                                                                              |                            |                      |                    |
|                                   | <b>US\$ 5,038</b>                                                                                                                                                                   |                            | <b>5,526</b>         |                    |
| Schmier et al. 2006 <sup>28</sup> | annual costs for quantity of caregiver time addicted to the degree of visual impairment per patient diabetic retinopathy                                                            |                            |                      |                    |
|                                   | mean 5.7 hours a day 5 days a week                                                                                                                                                  |                            |                      |                    |
|                                   | overall amount of <b>US\$ 9572.77</b>                                                                                                                                               |                            | <b>11,194.40</b>     |                    |
| Keeffe et al. 2009 <sup>19</sup>  | personal out-of-pocket expenses regarding the burden of caregiver                                                                                                                   |                            |                      |                    |
|                                   | median annual opportunity costs for worktime spent on caregiving <b>AUS\$ 915</b>                                                                                                   |                            | <b>2,244.60</b>      |                    |
| Wong et al. 2008 <sup>30</sup>    | annual median personal costs for informal care and assistance in activities of daily living                                                                                         |                            |                      |                    |
|                                   | e.g. meal preparing, dressing, shopping, transportation <b>AUS\$ 2,911</b>                                                                                                          |                            | <b>6,451</b>         |                    |
| Lafuma et al. 2006 <sup>21</sup>  | national survey with estimation on costs for time caregiver spent on of low vision and blindness for persons in the community (declared annually per person and total expenditures) |                            |                      |                    |
|                                   | <b>low vision</b>                                                                                                                                                                   | <b>blindness</b>           | <b>low vision</b>    | <b>blindness</b>   |
|                                   | informal care <b>€ 1881.80 pp/ year</b>                                                                                                                                             | <b>€ 7,316.26 pp/ y</b>    | <b>1,944</b>         | <b>7,560.48</b>    |
|                                   | <b>€ 2,101 million total</b>                                                                                                                                                        | <b>€ 424 million total</b> | <b>2,171 million</b> | <b>438 million</b> |

## Indirect costs

Studies of indirect costs demonstrate high expenditures related to productivity losses, changes in employment (employer and/or area of work), loss of income, premature mortality, and dead weight losses (**Table 5**). Received social allowances were detailed in one study, but not counted towards the overall costs as they were considered transfer costs.[26] One study included the loss of caregivers' time, which is spent on support in terms of productivity loss but also as a loss of personal time and time to engage in leisure activities.[23] Equal to other cost components indirect costs correlated with the degree of visual impairment, with the highest indirect costs reported for blind persons. Compared to all other cost categories indirect costs due to productivity losses, lower employment rates and losses of income in patients as well as caregivers caused the highest economic burden. Annual estimates of productivity losses and absenteeism due to visual impairment and blindness in the USA and Canada range from US\$ PPP 4,974-5,724 million, and are estimated to be US\$ PPP 7,367 million for an overall decrease in workforce participation in the US (**Table 5**).

**Table 5: Outcomes for indirect costs**

| Study                             | cost outcomes                                                                                                                                                                                                                              | US\$ PPP in 2011     |                                    |              |
|-----------------------------------|--------------------------------------------------------------------------------------------------------------------------------------------------------------------------------------------------------------------------------------------|----------------------|------------------------------------|--------------|
| Rein et al. 2006 <sup>25</sup>    | total annual indirect costs caused by visual disorders                                                                                                                                                                                     |                      |                                    |              |
|                                   | decreased work force participation <b>US\$ 6.3 billion</b>                                                                                                                                                                                 |                      | 7,367 million                      |              |
|                                   | decreased wages <b>US\$ 1.73 billion</b>                                                                                                                                                                                                   |                      | 2,023 million                      |              |
| Roberts et al. 2010 <sup>28</sup> | indirect costs for visual impairment and blindness                                                                                                                                                                                         |                      |                                    |              |
|                                   | productivity losses <b>US\$ 4.667 billion</b>                                                                                                                                                                                              |                      | 4,974 million                      |              |
|                                   | lower employment <b>US\$ 4.230 billion</b>                                                                                                                                                                                                 |                      | 4,509 million                      |              |
|                                   | absenteeism <b>US\$ 0.384 billion</b>                                                                                                                                                                                                      |                      | 409 million                        |              |
|                                   | premature mortality <b>US\$ 0.053 billion</b>                                                                                                                                                                                              |                      | 56.5 million                       |              |
| Lafuma et al. 2006 <sup>21</sup>  | national survey with estimation on indirect costs for losses of income in persons with low vision and blindness living in institutions <sup>1</sup> or in the community <sup>2</sup> (declared annually per person and total expenditures) |                      |                                    |              |
|                                   | <b>low vision</b>                                                                                                                                                                                                                          | <b>blindness</b>     | <b>low vision</b> <b>blindness</b> |              |
|                                   | losses of incomes <sup>1</sup> € 120.00 pp/y                                                                                                                                                                                               | € 180.00 pp/y        | 124                                | 186          |
|                                   | € 10.71 million total                                                                                                                                                                                                                      | € 1.87 million total | 11.07 million                      | 1.93 million |
|                                   | losses of incomes <sup>2</sup> € 3,912.00 pp/y                                                                                                                                                                                             | € 3,168.00 pp/y      | 4,042                              | 3,273        |
| € 4,369 million total             | € 183.6 million total                                                                                                                                                                                                                      | 4,515 million        | 189.72 million                     |              |
| Brezin et al. 2005 <sup>12</sup>  | prevalence and burden of blindness, low vision and visual impairment in the French community (estimation of monthly average value)                                                                                                         |                      |                                    |              |
|                                   | <b>low vision</b>                                                                                                                                                                                                                          | <b>blindness</b>     | <b>low vision</b> <b>blindness</b> |              |
|                                   | social allowances € 87                                                                                                                                                                                                                     | € 364                | 92                                 | 384          |
|                                   | total household income € 1,525                                                                                                                                                                                                             | € 1,587              | 1,607                              | 1,673        |
| household income no VI € 1,851    |                                                                                                                                                                                                                                            | 1,951                |                                    |              |
| Cruess et al. 2011 <sup>15</sup>  | indirect costs for Canada caused by vision loss                                                                                                                                                                                            |                      |                                    |              |
|                                   | employment participation, absenteeism, presenteeism <b>CAN \$ 4,431 million</b>                                                                                                                                                            |                      | 5,724 million                      |              |
|                                   | dead weight losses <b>CAN\$ 1,757 million</b>                                                                                                                                                                                              |                      | 2,270 million                      |              |



## Intangible effects

Most studies used personal burden such as depression, emotional distress, loss of independency, loss of quality of life, limitations in activities of daily living or hazards such as falls and injuries to capture intangible effects of visual impairment and blindness. Two studies, set in Japan and Canada, reported a loss of well being as DALYs and an associated cost of US\$ PPP 51.8 billion and US\$ PPP 15.11 billion per year respectively.[17, 28] Every reviewed study reported a high burden caused by multiple individual restrictions in patients and also in caregivers, which was found to be increasing with the degree of visual impairment (**Table 6**). Mortality associated with visual impairment was reported to increase linearly from 4.5% in persons with normal visual acuity ( $\geq 20/20$ ) to 22.2% in blind persons (visual acuity of  $< 20/200$ ) [24]. Measured as a restriction in care givers, Brezin and colleagues [14] reported a increases from 1.6% of caregivers of non-visually impaired persons, who reported restrictions in going out during the day, up to 12% for caregivers of blind patients.

Table 6: Outcomes for intangible effects

| Study                             | Outcomes                                                                                                                                                                                                                                                                                                                                                     |
|-----------------------------------|--------------------------------------------------------------------------------------------------------------------------------------------------------------------------------------------------------------------------------------------------------------------------------------------------------------------------------------------------------------|
| Bramley et al. 2008 <sup>11</sup> | incidences of depression occur in 17% more than patients with no vision loss, placements in nursing homes are demanded in 25.3% more, injuries happen in 33.4% more cases and femur fractures in 67.4% more cases                                                                                                                                            |
| Cruess et al. 2011 <sup>15</sup>  | loss of well-being and loss in quality of life evokes 77,306 DALYs or rather CAN\$ 11.7 billion in 2007 (US\$ PPP 15.11 billion in 2011)                                                                                                                                                                                                                     |
| Vu et al. 2005 <sup>29</sup>      | non-correctable unilateral vision loss was addicted to independent living and reduced safety; bilateral non-correctable vision loss was associated with nursing homes, emotional wellbeing, use of community services, and activities of daily living                                                                                                        |
| Wood et al. 2008 <sup>31</sup>    | increased visual impairment was significantly associated with an increased incidence of falls and other injuries. 54% of participants had at least one fall, 30% had more than fall, and 63% of falls ended in injuries                                                                                                                                      |
| McCarty et al. 2001 <sup>22</sup> | a linear increase of 5-year mortality correlating with degree of visual impairment was detected; even mild visual impairment is related to a more than twofold risk of death                                                                                                                                                                                 |
| Brezin et al. 2005 <sup>12</sup>  | burden in patients occurs because of inability to undertake daily activities; need of assistance correlates with degree of visual impairment; burden on caregiver was caused by limited by restricted possibilities for going out for different periods or losing social contacts, affected physical and mental welfare and modified professional activities |
| Porz et al. 2010 <sup>24</sup>    | in a questionnaire with score scale 0-100 points patients with VA $\geq 0.3$ achieved 79.32 for mobility and independency, 69.64 for emotional well-being and 73.86 for reading and achievement of information; persons with VA $< 0.3$ were rated with scores 46.84, 61.43, 44.25 respectively                                                              |
| Roberts et al. 2010 <sup>26</sup> | loss of well-being was measured in DALYs; converted into a monetary value this results in total annual costs of US\$ 48.598 billion (US\$ PPP 51.8 billion in 2011) and costs per capita of US\$ 29,690 per year (US\$ PPP 31,647)                                                                                                                           |

## DISCUSSION

In this first systematic review of costs associated with visual impairment and blindness we could demonstrate a considerable impact of visual impairment and blindness in terms of the associated direct and indirect costs, as well as intangible effects such as loss of well-being, independence and excess mortality. The highest costs are caused by productivity losses in visually impaired and blind persons as well as their carers, followed by formal and informal care giving, recurrent hospitalizations and the use of medical and supportive services in the visually impaired and blind. A much larger economic impact was due to intangible effects

1  
2  
3 such as loss of independence, quality of life and excess morbidity. However, these are very  
4 difficult to quantify in monetary terms and only a small number of studies attempted this. All  
5 highlighted cost components as well as intangible effects which contribute to the overall eco-  
6 nomic impact of visual impairment and blindness need to be considered in economic evalua-  
7 tions not only of visual impairment and blindness but also of interventions aimed at averting  
8 these, depending on the focus of the economic evaluation.  
9  
10  
11

12  
13 A large proportion of the direct costs reported in reviewed studies are not directly related to  
14 eye-related medical care, but to falls and other accidents due to visual impairment, exacerbation  
15 of diabetes due to a reduced ability to self-manage, depression related to loss of vision  
16 and further excess morbidity.[20] Drug costs were not a major contributor to overall costs,  
17 which is mirrored in studies investigating chronic diseases such as diabetes mellitus, where –  
18 despite its ongoing use – hypoglycaemic drugs constitute only a small proportion of overall  
19 direct medical costs.[34] Annual mean costs of other potentially incapacitating chronic dis-  
20 eases such as diabetes mellitus (Euros 5,262 or USD 6,889)[34] or the first year after a  
21 stroke (USD 14,361)[35] were much lower for diabetes and similar for the stroke estimate  
22 compared to mean annual costs of severe visual impairment and blindness.[13, 20] This is  
23 likely due to the average diabetic not requiring professional care giving of a scale required  
24 during the first year after a stroke or in severely visually impaired and blind persons. In se-  
25 verely visually impaired or blind persons, however, these costs are incurred every year fol-  
26 lowing the loss of vision, and do not decrease significantly over the following years unlike  
27 reported annual costs for stroke.[35] Javitt and colleagues report all direct medical cost  
28 caused by visual impairment to amount to US\$ 2.14 million in 2003 in all non-institutionalized  
29 Medicare beneficiaries 69 years and older, and postulate a much higher cost for the whole of  
30 the US population.[20] With the introduction of anti-Vascular-Endothelial-Growth-Factor  
31 treatment for a number of potentially blinding eye diseases such as neovascular age-related  
32 macular degeneration, diabetic macular edema or macular edema in retinal vein occlusions  
33 since all reviewed studies were conducted, the overall direct medical costs associated with  
34 visual impairment can be expected to be much higher today. This increase in cost is exacer-  
35 bated by the ageing of populations in all developed countries as all major blinding diseases  
36 are age-related.[27]  
37  
38  
39  
40  
41  
42  
43  
44  
45  
46  
47  
48  
49  
50

51  
52 Our finding that indirect costs are much higher than direct costs caused by visual impairment  
53 and blindness is mirrored by virtually all other cost-of-illness studies assessing the economic  
54 impact of diseases or impairments which result in absenteeism and reduced ability to work.  
55 Back pain, for example, was found to cause considerable absenteeism and disablement,  
56 which – despite its significant hospital cost – lead to indirect cost constituting 93% of the  
57  
58  
59  
60

1  
2  
3 overall cost in 1991 in the Netherlands.[36] Even in treatment and healthcare resource inten-  
4 sive chronic diseases such as diabetes mellitus, indirect costs pose more than half of the  
5 overall costs caused by the illness.[37]  
6  
7

8  
9 All studies which assessed intangible effects in economic terms reported these to be the  
10 largest contributor to the overall economic impact of visual impairment and blindness. Con-  
11 sidering the adverse impact of losing vision on quality of life, independence and the ability  
12 to participate in society, this is not surprising. We and others have previously reported that  
13 even mild visual impairment ( $0.3 < \text{LogMAR} < 0.5$ ) has a significant and independent impact on  
14 vision-specific functioning.[38-40] Similarly, emotional well-being is affected in patients with  
15 even mild vision impairment.[39] Depression is considered to result in further functional de-  
16 cline in this group by reducing motivation, initiative and resiliency[41] and people with de-  
17 pression are less likely to access vision rehabilitation services than those not depressed.[42,  
18 43] Even unilateral vision loss had a measurable impact on falling and some other activities  
19 of independent living, with increased odds of having problems in many activities of daily life  
20 in the study conducted by Vu and colleagues.[31] All this very adversely impacts the ability to  
21 participate in society, and contributes to the considerable economic impact of intangible ef-  
22 fects caused by visual impairment and blindness.  
23  
24  
25  
26  
27  
28  
29  
30

31  
32 There are several limitations which necessitate a careful interpretation of the overall findings.  
33 Using key words to identify relevant literature always bears the potential of a too narrow fo-  
34 cus, and not all relevant literature may have been included. However, based on the searches  
35 conducted, as well as the cross-searching performed based on references, the authors are  
36 confident that the vast majority of relevant literature could be included. To the authors'  
37 knowledge, a standardized quality checklist has not been used to assess economic evalua-  
38 tions of the impact of visual impairment and blindness prior to inclusion into a systematic  
39 review to date. This further increases the overall quality of our review. The study synthesis of  
40 reviewed literature was limited as no two studies used the same methodology, reported ex-  
41 actly the same outcomes or used the same sample population. These problems have been  
42 reported for cost-of-illness - or in this case cost-of-impairment - studies in other areas, and  
43 adherence to existing cost-of-illness study guidelines recommended.[11, 44] Unfortunately,  
44 none of the reviewed studies seem to have adhered to any of the available international  
45 standards, and thus the overall comparability is limited. Similar to cost-of-illness studies in  
46 other areas, studies are summarized mostly descriptively, or at a high level of  
47 aggregation.[11] The same applies to the chosen categories of visual impairment used in all  
48 studies which differ considerably (**Table 1**). The perspective (affected person, healthcare  
49 payer, societal) of the study was only described in a minority of reports, and as highlighted in  
50  
51  
52  
53  
54  
55  
56  
57  
58  
59  
60

1  
2  
3 the results section, most studies were conducted in the USA and Australia, making infer-  
4 ences to other countries and healthcare systems difficult. However, this is the only systemat-  
5 ic review of the economic impact of visual impairment and blindness to date, highlighting the  
6 very broad economic impact and outlining the considerable scope a comprehensive econom-  
7 ic evaluation in this area should ideally have.  
8  
9

10  
11  
12 In conclusion, visual impairment and blindness cause a considerable economic burden for  
13 affected persons, their care givers and society at large, which increases with the degree of  
14 visual impairment for all assessed cost categories as well as intangible effects. This review  
15 highlights a large amount of cost categories which should be considered in economic evalua-  
16 tions in eye health, and future cost-of illness or cost-of-impairment studies should adhere to  
17 available guidelines to improve comparability. The review highlights the considerable amount  
18 of resources spent on caring for visually impaired and blind persons in the absence of a cure.  
19  
20  
21  
22  
23

## 24 FINANCIAL DISCLOSURE

25  
26 The study was supported by the German Research Council (DFG FI 1540/5-5, grant to RPF),  
27 by an unconditional grant from Novartis Pharma Germany and by the Australian National  
28 Health and Medical Research Council Centre for Clinical Research Excellence #529923 -  
29 Translational Clinical Research in Major Eye Diseases. CERA receives Operational Infra-  
30 structure Support from the Victorian Government. The funders had no role in study design,  
31 data collection and analysis, decision to publish, or preparation of the manuscript.  
32  
33  
34  
35  
36  
37

## 38 COMPETING INTERESTS

39 Authors declared that there are no competing interests.  
40  
41  
42  
43

## 44 AUTHORS' CONTRIBUTION

45 All authors contributed to the design of the review, KB and CS searched databases and ex-  
46 tracted references, KB, CS and JK collated studies, and drafted the manuscript, all authors  
47 critically revised the manuscript.  
48  
49  
50  
51  
52

## 53 DATA SHARING

54 There are no additional unpublished data from the study available.  
55  
56  
57  
58  
59  
60

1  
2  
3 REFERENCES  
4  
5  
6  
7  
8  
9  
10  
11  
12  
13  
14  
15  
16  
17  
18  
19  
20  
21  
22  
23  
24  
25  
26  
27  
28  
29  
30  
31  
32  
33  
34  
35  
36  
37  
38  
39  
40  
41  
42  
43  
44  
45  
46  
47  
48  
49  
50  
51  
52  
53  
54  
55  
56  
57  
58  
59  
60

For peer review only

1. Finger RP FR, Holz FG, Scholl HP. Incidence of Blindness and Severe Visual Impairment in Germany: Projections for 2030. *Invest Ophthalmol Vis Sci*. 2011.
2. Murray CJ VT, Lozano R, Naghavi M, Flaymann AD, Michaud C, et al. Disability-adjusted life years (DALYs) for 291 diseases and injuries in 21 regions, 1990-2010: a systematic analysis for the Global Burden of Disease Study 2010. *Lancet*. 2012;380(9859):2197-223.
3. Williams RA TR, Kaplan RM, Brown SI. The psychological impact of macular degeneration. *Archives of Ophthalmology*. 1998;116(4):514-20.
4. Taylor HR, Pezzullo ML, Keffee JE. The economic impact and cost of visual impairment in Australia. *British Journal of Ophthalmology*. 2006;90(3):272-5.
5. Drummond MF. *Methods for the economic evaluation of health care programmes*. 3 ed. Oxford: Oxford University Press; 2005.
6. Luce BR, Anne E. Estimating costs in the economic evaluation of medical technologies. *International Journal of Technology Assessment in Health Care*. 1990(6):57-75.
7. Ament AES. Cost of illness studies in health care: a comparison of two cases. *Health policy (Amsterdam, Netherlands)*. 1993(26).
8. Emmert M, Huber M, Schöffski O. Eine Aggregation von Instrumenten zur Qualitätsbewertung gesundheitsökonomischer Evaluationsstudien. *PharmacoEconomics*. 2011(9):11-30.
9. Brennan RL, Prediger DJ. Coefficient Kappa: Some uses, misuses, and alternatives. 1981(41):687-99.
10. Landis JR, Koch GG. The measurement of observer agreement for categorical data. *Biometrics*. 1977(33):159-74.
11. The World Bank: GDP deflator - World development Indicators. Access date: 2013-04-08 2013 [cited 2013 08.04.2013]; Available from: <http://data.worldbank.org/indicator/NY.GDP.DEFL.KD.ZG/countries>.
12. OECD. *Health policies and data: OECD Health Data 2012*. 2012.
13. Bramley T, Peeples P, Walt JG, Juhasz M, Hansen JE. Impact of vision loss on costs and outcomes in medicare beneficiaries with glaucoma. *Archives of ophthalmology*. 2008;126(6):849-56.
14. Brézin AP, Lafuma A, Fagnani F, Mesbah M, Gilles B. Prevalence and burden of self-reported blindness, low vision, and visual impairment in the french community: A nationwide survey. *Archives of Ophthalmology*. 2005;123(8):1117-24.
15. Chou S-L, Lamoureux E, Keeffe J. Methods for measuring personal costs associated with vision impairment. *Ophthalmic epidemiology*. 2006;13(6):355-63.
16. Clarke P, Gray A, Legood R, Briggs A, Holman R. The impact of diabetes-related complications on healthcare costs: results from the United Kingdom Prospective Diabetes Study (UKPDS Study No. 65). *Diabetic medicine : a journal of the British Diabetic Association*. 2003;20(6):442-50.
17. Cruess AF, Gordon KD, Bellan L, Mitchell S, Pezzullo ML. The cost of vision loss in Canada. 2. Results. *Canadian journal of ophthalmology*. 2011;46(4):315-8.
18. Gordon KD, Cruess AF, Bellan L, Mitchell S, Pezzullo ML. The cost of vision loss in Canada. 1. Methodology. *Canadian journal of ophthalmology*. 2011;46(4):310-4.



19. Frick KD, Walt JG, Chiang TH, Doyle JJ, Stern LS, Katz LM, et al. Direct costs of blindness experienced by patients enrolled in managed care. *Ophthalmology*. 2008;115(1):11–7.
20. Javitt JC, Zhou Z, Willke RJ. Association between vision loss and higher medical care costs in Medicare beneficiaries costs are greater for those with progressive vision loss. *Ophthalmology*. 2007;114(2):238–45.
21. Keefe JE, Chou S-L, Lamoureux EL. The cost of care for people with impaired vision in Australia. *Archives of ophthalmology*. 2009;127(10):1377–81.
22. Kymes SM, Plotzke MR, Li JZ, Nichol MB, Wu J, Fain J. The increased cost of medical services for people diagnosed with primary open-angle glaucoma: a decision analytic approach. *American journal of ophthalmology*. 2010;150(1):74–81.
23. Lafuma A, Brezin A, Fagnani F, Mimaud V, Mesbah M, Berdeaux G. Nonmedical economic consequences attributable to visual impairment. *The European Journal of Health Economics*. 2006;7(3):158–64.
24. McCarty CA, Nanjan MB, R TH. Vision impairment predicts 5 year mortality. *British Journal of Ophthalmology*. 2001;85(3):322–6.
25. Morse AR, Yatzkan E, Berberich B, Arons RR. Acute care hospital utilization by patients with visual impairment. *Archives of ophthalmology*. 1999;117(7):943–9.
26. Porz G, Scholl HPN, Holz FG, Finger RP. Methoden zur Ermittlung persönlicher Krankheitskosten am Beispiel retinaler Erkrankungen. *Der Ophthalmologe*. 2010;107(3):216–22.
27. Rein DB, Zhang P, E WK, Lee PP, Hoerger TJ, McCall N, et al. The economic burden of major adult visual disorders in the united states. *Archives of Ophthalmology*. 2006;124(12):1754–60.
28. Roberts CB, Hiratsuka Y, Yamada M, Pezzullo ML, Yates K, Takano S, et al. Economic cost of visual impairment in Japan. *Archives of ophthalmology*. 2010;128(6):766–71.
29. Schmier JK, Covert DW, Matthews GP, Zakov ZN. Impact of visual impairment on service and device use by individuals with diabetic retinopathy. *Disability and rehabilitation*. 2009;31(8):659–65.
30. Schmier JK, Halpern MT, Covert D, Delgado J, Sharma S. Impact of visual impairment on use of caregiving by individuals with age-related macular degeneration. *Retina (Philadelphia, Pa)*. 2006;26(9):1056–62.
31. Vu HTV, Keefe JE, McCarty CA, Taylor HR. Impact of unilateral and bilateral vision loss on quality of life. *British Journal of Ophthalmology*. 2005;89(3):360–3.
32. Wong EYH, Chou S-L, Lamoureux EL, Keefe JE. Personal costs of visual impairment by different eye diseases and severity of visual loss. *Ophthalmic epidemiology*. 2008;15(5):339–44.
33. Wood JM, Lacherez P, Black AA, Cole MH, Boon MY, Kerr GK. Risk of falls, injurious falls, and other injuries resulting from visual impairment among older adults with age-related macular degeneration. *Investigative ophthalmology & visual science*. 2011;52(8):5088–92.
34. Koster I, von Ferber L, Ihle P, Schubert I, Hauner H. The cost burden of diabetes mellitus: the evidence from Germany--the CoDiM study. *Diabetologia*. [Evaluation Studies Research Support, Non-U.S. Gov't]. 2006 Jul;49(7):1498-504.

- 1  
2  
3 35. Dewey HM, Thrift AG, Mihalopoulos C, Carter R, Macdonell RA, McNeil JJ, et al. Cost  
4 of stroke in Australia from a societal perspective: results from the North East Melbourne  
5 Stroke Incidence Study (NEMESIS). *Stroke*. [Research Support, Non-U.S. Gov't]. 2001  
6 Oct;32(10):2409-16.
- 7  
8 36. van Tulder MW, Koes BW, Bouter LM. A cost-of-illness study of back pain in The  
9 Netherlands. *Pain*. [Research Support, Non-U.S. Gov't]. 1995 Aug;62(2):233-40.
- 10  
11 37. Henriksson F, Jonsson B. Diabetes: the cost of illness in Sweden. *J Intern Med*.  
12 [Research Support, Non-U.S. Gov't]. 1998 Dec;244(6):461-8.
- 13  
14 38. Finger RP, Fenwick E, Chiang PP, Petrak M, Holz FG, Marella M, et al. The impact of  
15 the severity of vision loss on vision-specific functioning in a German outpatient population -  
16 an observational study. *Graefes Arch Clin Exp Ophthalmol*. 2011 Aug;249(8):1245-53.
- 17  
18 39. Finger RP, Fenwick E, Marella M, Dirani M, Holz FG, Chiang PP, et al. The impact of  
19 vision impairment on vision-specific quality of life in Germany. *Invest Ophthalmol Vis Sci*.  
20 2011 May;52(6):3613-9.
- 21  
22 40. Lamoureux EL, Chong E, Wang JJ, Saw SM, Aung T, Mitchell P, et al. Visual  
23 impairment, causes of vision loss, and falls: the singapore malay eye study. *Invest*  
24 *Ophthalmol Vis Sci*. 2008 Feb;49(2):528-33.
- 25  
26 41. Rovner BW, Casten RJ, Tasman WS. Effect of depression on vision function in age-  
27 related macular degeneration. *Archives of Ophthalmology*. 2002 Aug;120(8):1041-4.
- 28  
29 42. Tolman J, Hill RD, Kleinschmidt JJ, Gregg CH. Psychosocial adaptation to visual  
30 impairment and its relationship to depressive affect in older adults with age-related macular  
31 degeneration. *Gerontologist*. 2005 Dec;45(6):747-53.
- 32  
33 43. Horowitz A, Reinhardt JP, Boerner K, Travis LA. The influence of health, social  
34 support quality and rehabilitation on depression among disabled elders. *Aging & Mental*  
35 *Health*. 2003 Sep;7(5):342-50.
- 36  
37 44. Bloom BS, Bruno DJ, Maman DY, Jayadevappa R. Usefulness of US cost-of-illness  
38 studies in healthcare decision making. *PharmacoEconomics*. [Meta-Analysis].  
39 2001;19(2):207-13.
- 40  
41  
42  
43  
44  
45  
46  
47  
48  
49  
50  
51  
52  
53  
54  
55  
56  
57  
58  
59  
60



## FIGURES

Figure 1: Inclusion of articles

Figure 2: Quality rating of included studies

Figure 3: Kappa-index per study

For peer review only

1  
2  
3  
4  
5  
6  
7  
8  
9  
10  
11  
12  
13  
14  
15  
16  
17  
18  
19  
20  
21  
22  
23  
24  
25  
26  
27  
28  
29  
30  
31  
32  
33  
34  
35  
36  
37  
38  
39  
40  
41  
42  
43  
44  
45  
46  
47  
48  
49  
50  
51  
52  
53  
54  
55  
56  
57  
58  
59  
60

APPENDIX

Appendix 1: Quality checklist

Appendix 2: Cost categories reported in included studies.

For peer review only

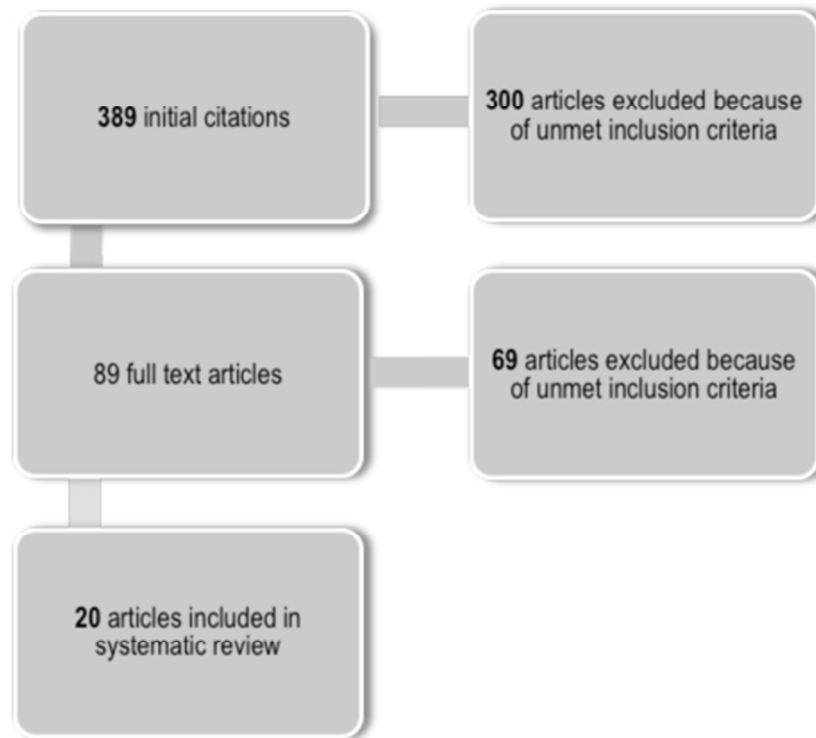

Inclusion of articles

view only

1  
2  
3  
4  
5  
6  
7  
8  
9  
10  
11  
12  
13  
14  
15  
16  
17  
18  
19  
20  
21  
22  
23  
24  
25  
26  
27  
28  
29  
30  
31  
32  
33  
34  
35  
36  
37  
38  
39  
40  
41  
42  
43  
44  
45  
46  
47  
48  
49  
50  
51  
52  
53  
54  
55  
56  
57  
58  
59  
60

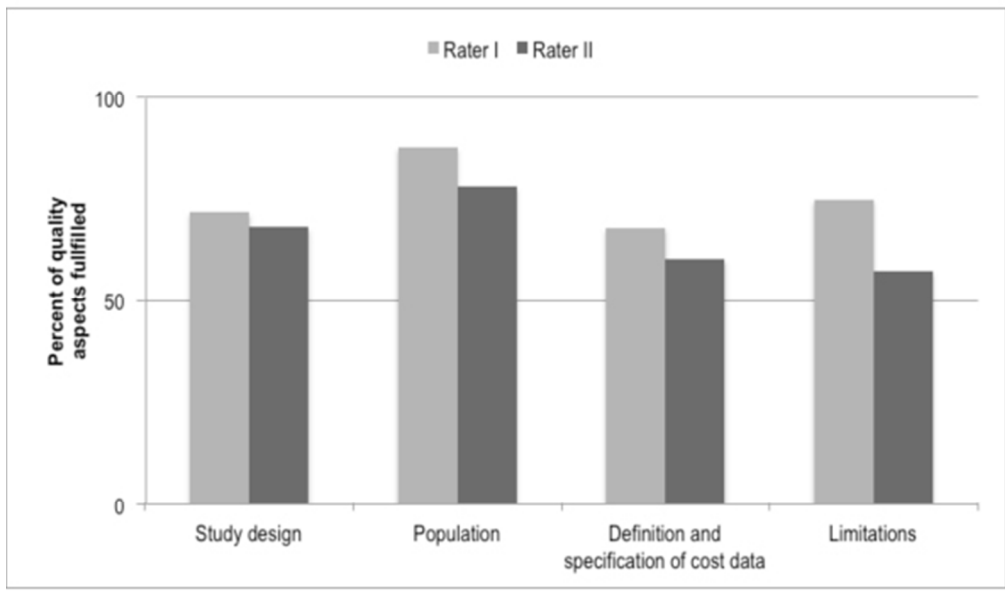

Quality rating of included studies  
208x169mm (72 x 72 DPI)

ew only

1  
2  
3  
4  
5  
6  
7  
8  
9  
10  
11  
12  
13  
14  
15  
16  
17  
18  
19  
20  
21  
22  
23  
24  
25  
26  
27  
28  
29  
30  
31  
32  
33  
34  
35  
36  
37  
38  
39  
40  
41  
42  
43  
44  
45  
46  
47  
48  
49  
50  
51  
52  
53  
54  
55  
56  
57  
58  
59  
60

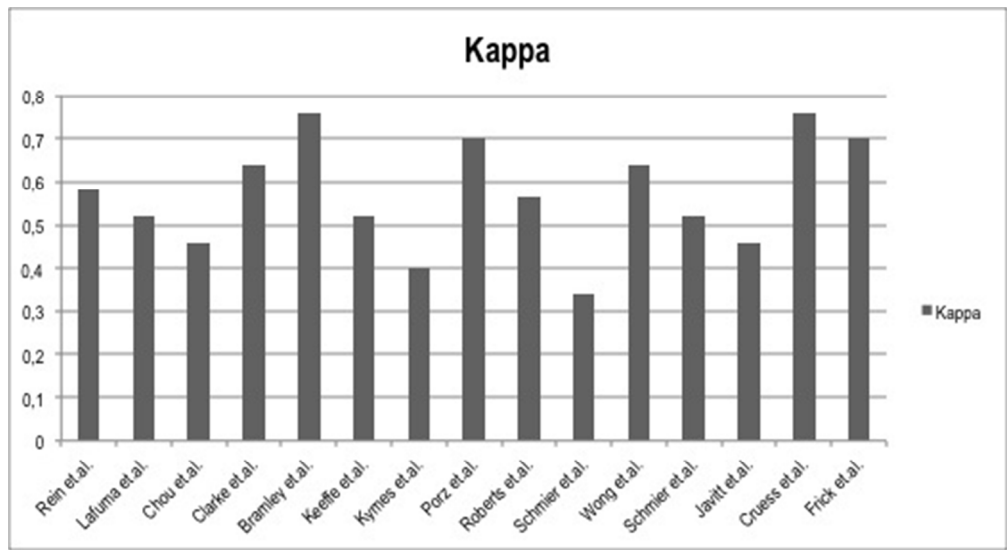

Kappa-index per study  
184x100mm (72 x 72 DPI)

review only

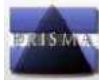

# PRISMA 2009 Checklist

1  
2  
3  
4  
5  
6  
7  
8  
9  
10  
11  
12  
13  
14  
15  
16  
17  
18  
19  
20  
21  
22  
23  
24  
25  
26  
27  
28  
29  
30  
31  
32  
33  
34  
35  
36  
37  
38  
39  
40  
41  
42  
43  
44  
45  
46  
47  
48  
49

| Section/topic                      | #  | Checklist item                                                                                                                                                                                                                                                                                              | Reported on page # |
|------------------------------------|----|-------------------------------------------------------------------------------------------------------------------------------------------------------------------------------------------------------------------------------------------------------------------------------------------------------------|--------------------|
| <b>TITLE</b>                       |    |                                                                                                                                                                                                                                                                                                             |                    |
| Title                              | 1  | Identify the report as a systematic review, meta-analysis, or both.                                                                                                                                                                                                                                         | 1                  |
| <b>ABSTRACT</b>                    |    |                                                                                                                                                                                                                                                                                                             |                    |
| Structured summary                 | 2  | Provide a structured summary including, as applicable: background; objectives; data sources; study eligibility criteria, participants, and interventions; study appraisal and synthesis methods; results; limitations; conclusions and implications of key findings; systematic review registration number. | 2                  |
| <b>INTRODUCTION</b>                |    |                                                                                                                                                                                                                                                                                                             |                    |
| Rationale                          | 3  | Describe the rationale for the review in the context of what is already known.                                                                                                                                                                                                                              | 3                  |
| Objectives                         | 4  | Provide an explicit statement of questions being addressed with reference to participants, interventions, comparisons, outcomes, and study design (PICOS).                                                                                                                                                  | 3                  |
| <b>METHODS</b>                     |    |                                                                                                                                                                                                                                                                                                             |                    |
| Protocol and registration          | 5  | Indicate if a review protocol exists, if and where it can be accessed (e.g., Web address), and, if available, provide registration information including registration number.                                                                                                                               | 3-4                |
| Eligibility criteria               | 6  | Specify study characteristics (e.g., PICOS, length of follow-up) and report characteristics (e.g., years considered, language, publication status) used as criteria for eligibility, giving rationale.                                                                                                      | 4                  |
| Information sources                | 7  | Describe all information sources (e.g., databases with dates of coverage, contact with study authors to identify additional studies) in the search and date last searched.                                                                                                                                  | 3-4                |
| Search                             | 8  | Present full electronic search strategy for at least one database, including any limits used, such that it could be repeated.                                                                                                                                                                               | 3                  |
| Study selection                    | 9  | State the process for selecting studies (i.e., screening, eligibility, included in systematic review, and, if applicable, included in the meta-analysis).                                                                                                                                                   | 3-4                |
| Data collection process            | 10 | Describe method of data extraction from reports (e.g., piloted forms, independently, in duplicate) and any processes for obtaining and confirming data from investigators.                                                                                                                                  | 3-4                |
| Data items                         | 11 | List and define all variables for which data were sought (e.g., PICOS, funding sources) and any assumptions and simplifications made.                                                                                                                                                                       | 3-4, 7-10          |
| Risk of bias in individual studies | 12 | Describe methods used for assessing risk of bias of individual studies (including specification of whether this was done at the study or outcome level), and how this information is to be used in any data synthesis.                                                                                      | Not done           |
| Summary measures                   | 13 | State the principal summary measures (e.g., risk ratio, difference in means).                                                                                                                                                                                                                               | 3-4                |
| Synthesis of results               | 14 | Describe the methods of handling data and combining results of studies, if done, including measures of consistency (e.g., $I^2$ for each meta-analysis).                                                                                                                                                    | Not done           |

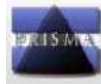

# PRISMA 2009 Checklist

Page 1 of 2

| Section/topic                 | #  | Checklist item                                                                                                                                                                                           | Reported on page # |
|-------------------------------|----|----------------------------------------------------------------------------------------------------------------------------------------------------------------------------------------------------------|--------------------|
| Risk of bias across studies   | 15 | Specify any assessment of risk of bias that may affect the cumulative evidence (e.g., publication bias, selective reporting within studies).                                                             | Not done           |
| Additional analyses           | 16 | Describe methods of additional analyses (e.g., sensitivity or subgroup analyses, meta-regression), if done, indicating which were pre-specified.                                                         | Not done           |
| <b>RESULTS</b>                |    |                                                                                                                                                                                                          |                    |
| Study selection               | 17 | Give numbers of studies screened, assessed for eligibility, and included in the review, with reasons for exclusions at each stage, ideally with a flow diagram.                                          | 5-6                |
| Study characteristics         | 18 | For each study, present characteristics for which data were extracted (e.g., study size, PICOS, follow-up period) and provide the citations.                                                             | 7-10               |
| Risk of bias within studies   | 19 | Present data on risk of bias of each study and, if available, any outcome level assessment (see item 12).                                                                                                | NA                 |
| Results of individual studies | 20 | For all outcomes considered (benefits or harms), present, for each study: (a) simple summary data for each intervention group (b) effect estimates and confidence intervals, ideally with a forest plot. | NA                 |
| Synthesis of results          | 21 | Present results of each meta-analysis done, including confidence intervals and measures of consistency.                                                                                                  | NA                 |
| Risk of bias across studies   | 22 | Present results of any assessment of risk of bias across studies (see Item 15).                                                                                                                          | NA                 |
| Additional analysis           | 23 | Give results of additional analyses, if done (e.g., sensitivity or subgroup analyses, meta-regression [see Item 16]).                                                                                    | NA                 |
| <b>DISCUSSION</b>             |    |                                                                                                                                                                                                          |                    |
| Summary of evidence           | 24 | Summarize the main findings including the strength of evidence for each main outcome; consider their relevance to key groups (e.g., healthcare providers, users, and policy makers).                     | 19-22              |
| Limitations                   | 25 | Discuss limitations at study and outcome level (e.g., risk of bias), and at review-level (e.g., incomplete retrieval of identified research, reporting bias).                                            | 21-22              |
| Conclusions                   | 26 | Provide a general interpretation of the results in the context of other evidence, and implications for future research.                                                                                  | 19-22              |
| <b>FUNDING</b>                |    |                                                                                                                                                                                                          |                    |
| Funding                       | 27 | Describe sources of funding for the systematic review and other support (e.g., supply of data); role of funders for the systematic review.                                                               | 22                 |

From: Moher D, Liberati A, Tetzlaff J, Altman DG, The PRISMA Group (2009). Preferred Reporting Items for Systematic Reviews and Meta-Analyses: The PRISMA Statement. PLoS Med 6(6): e1000097. doi:10.1371/journal.pmed1000097

For more information, visit: [www.prisma-statement.org](http://www.prisma-statement.org).

Page 2 of 2

For peer review only - <http://bmjopen.bmj.com/site/about/guidelines.xhtml>

**Study design**

1. Was the issue of research defined in a well answerable form?
2. Was the economic relevance of the research stated?
3. Was the medical context described well?
4. Were the perspectives of the study clearly described and justified?
5. Was the type of economic evaluation defined?
6. Was the valuation method stated (top-down, bottom-up, prevalence-based, incidence-based)?

**Population**

7. Was the study population described in detail?
8. Was the method of data acquisition explained (including evaluation of health states and further benefits)?
9. In case of estimations from subgroups, were the subgroups defined clearly in the beginning of the study?

**Definition and specification of cost data**

10. Were sources of data for consumption of resources exposed?
11. Was a justification stated for the selection of data sources?
12. Were all relevant (relating to the present issue of research) cost units identified?
13. Was the quantity of consumption and relevant prices mentioned separately?
14. Was the source of all relevant cost units exposed?
15. Were costs valued appropriately?
16. Were currencies and prices specified?
17. Were currency translations and price adjustments stated in detail?
18. Were price adjustments for inflation and deflation conducted adequately?
19. Is the year of currency declared?
20. Were economic productivity changes stated separately?
21. Were the changes in economic productivity changes discussed referred to the issue of research?
22. Is the data for productivity losses implicated correctly into the analysis?

**Limitations**

23. Were limitations stated and discussed?
24. Is the quality of data discussed critically?
25. Are biases described and discussed in manner and degree?



|                                  |                                                                                                                                                                   | Bramley, T. et al. | Brecht, A.P. et al. | Chiu, S.-L. et al. | Clarke, P. et al. | Cruise, A.F. et al. | Frick, K.D. et al. | Jarvis, J.C. et al. | Keefe, J.E. et al. | Kynas, S.M. et al. | Lafuria, A. et al. | McCarthy, C.A. et al. | Morse, A.R. et al. | Porz, G. et al. | Rein, D.B. et al. | Roberts, C.B. et al. | Schnier, J.K. et al. (2009) | Schnier, J.K. et al. (2009) | Vu, H.T. et al. | Wong, E.Y.H. et al. | Wood, J.M. et al. |   |
|----------------------------------|-------------------------------------------------------------------------------------------------------------------------------------------------------------------|--------------------|---------------------|--------------------|-------------------|---------------------|--------------------|---------------------|--------------------|--------------------|--------------------|-----------------------|--------------------|-----------------|-------------------|----------------------|-----------------------------|-----------------------------|-----------------|---------------------|-------------------|---|
| <b>direct medical costs</b>      |                                                                                                                                                                   |                    |                     |                    |                   |                     |                    |                     |                    |                    |                    |                       |                    |                 |                   |                      |                             |                             |                 |                     |                   |   |
|                                  | physician, outpatient                                                                                                                                             | x                  |                     |                    |                   | x                   | x                  | x                   | x                  |                    |                    |                       |                    |                 |                   |                      | x                           | x                           |                 |                     |                   |   |
|                                  | hospital, inpatient                                                                                                                                               | x                  |                     |                    | x                 | x                   | x                  | x                   |                    |                    |                    |                       |                    |                 |                   |                      | x                           | x                           |                 |                     |                   |   |
|                                  | rehabilitation                                                                                                                                                    | x                  |                     |                    |                   |                     | x                  |                     |                    |                    |                    |                       |                    |                 |                   |                      |                             |                             |                 | x                   |                   |   |
|                                  | hospice                                                                                                                                                           | x                  |                     |                    |                   |                     |                    |                     |                    | x                  |                    |                       |                    |                 |                   |                      |                             |                             |                 |                     |                   |   |
|                                  | counselling                                                                                                                                                       |                    |                     |                    | x                 |                     |                    |                     |                    |                    |                    |                       |                    |                 |                   |                      |                             |                             | x               |                     |                   |   |
|                                  | prescription drugs, vitamins and other medications                                                                                                                | x                  |                     |                    | x                 |                     |                    | x                   | x                  | x                  |                    |                       |                    |                 |                   | x                    | x                           | x                           |                 |                     | x                 |   |
|                                  | laboratory                                                                                                                                                        | x                  |                     |                    |                   |                     |                    |                     |                    | x                  |                    |                       |                    |                 |                   |                      |                             |                             |                 |                     |                   |   |
| <b>direct nonmedical costs</b>   |                                                                                                                                                                   |                    |                     |                    |                   |                     |                    |                     |                    |                    |                    |                       |                    |                 |                   |                      |                             |                             |                 |                     |                   |   |
|                                  | excess of stay in institutions                                                                                                                                    |                    |                     |                    |                   |                     |                    |                     |                    |                    |                    |                       | x                  |                 |                   |                      |                             |                             |                 |                     |                   |   |
| living in institutions           | long-term Care, nursing homes, skilled nursing facility                                                                                                           | x                  |                     |                    |                   |                     |                    |                     |                    | x                  |                    |                       |                    |                 |                   |                      | x                           |                             |                 |                     |                   |   |
| support in homely environment    | paid assistance / social support services / personal care services / home delivery services / home health care / independent living services / home-visit nursing | x                  |                     | x                  |                   |                     |                    |                     | x                  |                    |                    | x                     |                    |                 |                   | x                    | x                           | x                           | x               |                     | x                 |   |
| aids and devices                 | stick                                                                                                                                                             |                    |                     |                    |                   |                     |                    |                     |                    |                    |                    |                       | x                  |                 |                   |                      |                             |                             |                 |                     |                   |   |
|                                  | white stick                                                                                                                                                       |                    |                     |                    |                   |                     |                    |                     |                    |                    |                    |                       | x                  |                 |                   |                      |                             |                             |                 | x                   |                   |   |
|                                  | guide dogs / guide dog registration                                                                                                                               |                    |                     |                    | x                 |                     |                    |                     |                    |                    |                    |                       |                    |                 |                   |                      | x                           |                             |                 |                     | x                 |   |
|                                  | walking aids                                                                                                                                                      |                    |                     |                    |                   |                     |                    |                     |                    |                    |                    |                       | x                  |                 |                   |                      |                             |                             |                 |                     |                   |   |
|                                  | wheelchair                                                                                                                                                        |                    |                     |                    |                   |                     |                    |                     |                    |                    |                    |                       | x                  |                 |                   |                      |                             |                             |                 |                     |                   |   |
|                                  | optical assistance / low vision devices                                                                                                                           |                    |                     |                    | x                 |                     | x                  |                     |                    |                    |                    | x                     |                    |                 |                   | x                    |                             |                             |                 | x                   | x                 |   |
|                                  | television magnifier                                                                                                                                              |                    |                     |                    |                   |                     |                    |                     |                    |                    |                    |                       |                    |                 |                   |                      |                             |                             |                 | x                   |                   |   |
|                                  | low vision equipments                                                                                                                                             |                    |                     |                    |                   |                     |                    |                     |                    |                    |                    |                       |                    |                 |                   |                      |                             |                             |                 |                     | x                 |   |
| adaptation of living environment | furniture (toilet, kitchen, table, seat, bed, ramps, door opening device)                                                                                         |                    |                     |                    |                   |                     |                    |                     |                    |                    |                    |                       | x                  |                 |                   |                      |                             |                             |                 |                     |                   |   |
|                                  | extra lights / lamps                                                                                                                                              |                    |                     |                    |                   |                     |                    |                     |                    |                    |                    |                       |                    |                 |                   |                      |                             |                             |                 |                     | x                 |   |
|                                  | home modifications                                                                                                                                                |                    |                     |                    |                   |                     |                    |                     |                    |                    |                    |                       | x                  |                 |                   |                      |                             |                             |                 |                     |                   |   |
|                                  | move due to impairment                                                                                                                                            |                    |                     |                    |                   |                     |                    |                     |                    |                    |                    |                       | x                  |                 |                   |                      |                             |                             |                 |                     |                   |   |
| communication and media          | computer interface                                                                                                                                                |                    |                     |                    |                   |                     |                    |                     |                    |                    |                    |                       | x                  |                 |                   |                      |                             |                             |                 |                     |                   |   |
|                                  | software adapted for blindness                                                                                                                                    |                    |                     |                    | x                 |                     |                    |                     |                    |                    |                    |                       | x                  |                 |                   |                      |                             |                             |                 |                     | x                 |   |
|                                  | computer hardware / braille printer / talking books / tape recorder                                                                                               |                    |                     |                    | x                 |                     |                    |                     |                    |                    |                    |                       | x                  |                 |                   |                      |                             |                             |                 |                     | x                 |   |
|                                  | technical assistance                                                                                                                                              |                    |                     |                    |                   |                     |                    |                     |                    |                    |                    |                       |                    |                 |                   |                      |                             |                             |                 |                     |                   |   |
|                                  | national library service, library costs                                                                                                                           |                    |                     |                    |                   |                     |                    | x                   |                    |                    |                    |                       |                    |                 |                   |                      | x                           |                             |                 |                     |                   |   |
| transportation                   | taxi                                                                                                                                                              |                    |                     |                    | x                 |                     |                    |                     |                    |                    |                    |                       |                    |                 |                   |                      |                             |                             |                 |                     | x                 |   |
|                                  | public transport                                                                                                                                                  |                    |                     |                    | x                 |                     |                    |                     |                    |                    |                    |                       |                    |                 |                   |                      |                             |                             |                 |                     | x                 |   |
|                                  | transportation service                                                                                                                                            |                    |                     |                    |                   |                     |                    |                     |                    |                    |                    |                       |                    |                 |                   |                      |                             |                             |                 |                     | x                 |   |
|                                  | travel reimbursement                                                                                                                                              |                    |                     |                    |                   |                     |                    |                     |                    |                    |                    |                       |                    |                 |                   |                      | x                           |                             |                 |                     |                   |   |
| national budget                  | disability benefits and pension / aid to the blind                                                                                                                |                    |                     |                    |                   |                     |                    |                     |                    |                    |                    |                       |                    |                 |                   |                      | x                           |                             |                 |                     |                   |   |
|                                  | supplemental security income                                                                                                                                      |                    |                     |                    |                   |                     |                    |                     |                    |                    |                    |                       |                    |                 |                   |                      |                             | x                           |                 |                     |                   |   |
|                                  | food stamps                                                                                                                                                       |                    |                     |                    |                   |                     |                    |                     |                    |                    |                    |                       |                    |                 |                   |                      |                             | x                           |                 |                     |                   |   |
|                                  | committee for purchase from people who are blind or severely disabled                                                                                             |                    |                     |                    |                   |                     |                    |                     |                    |                    |                    |                       |                    |                 |                   |                      |                             |                             | x               |                     |                   |   |
|                                  | social security payments                                                                                                                                          |                    |                     |                    |                   |                     |                    | x                   |                    |                    |                    |                       |                    |                 |                   |                      |                             |                             |                 |                     |                   |   |
| insurances                       | accommodation allowance                                                                                                                                           |                    |                     |                    |                   |                     |                    |                     |                    |                    |                    |                       |                    |                 |                   |                      | x                           |                             |                 |                     |                   |   |
|                                  | long-term care insurance                                                                                                                                          |                    |                     |                    |                   |                     |                    |                     |                    |                    |                    |                       |                    |                 |                   |                      |                             |                             |                 | x                   |                   |   |
| other                            | social security disability insurance                                                                                                                              |                    |                     |                    |                   |                     |                    |                     |                    |                    |                    |                       |                    |                 |                   |                      |                             |                             |                 | x                   |                   |   |
|                                  | education expenses                                                                                                                                                |                    |                     |                    | x                 |                     |                    |                     |                    |                    |                    |                       |                    |                 |                   |                      |                             |                             |                 |                     | x                 |   |
|                                  | job training service                                                                                                                                              |                    |                     |                    |                   |                     |                    |                     |                    |                    |                    |                       |                    |                 |                   |                      |                             |                             |                 |                     | x                 |   |
| recreational services            |                                                                                                                                                                   |                    |                     |                    |                   |                     |                    |                     |                    |                    |                    |                       |                    |                 |                   |                      |                             |                             |                 | x                   |                   |   |
| <b>other direct costs</b>        |                                                                                                                                                                   |                    |                     |                    |                   |                     |                    |                     |                    |                    |                    |                       |                    |                 |                   |                      |                             |                             |                 |                     |                   |   |
|                                  | informal care                                                                                                                                                     |                    |                     |                    |                   |                     |                    |                     |                    |                    |                    |                       | x                  | x               |                   |                      |                             |                             |                 | x                   | x                 | x |
| <b>indirect costs</b>            |                                                                                                                                                                   |                    |                     |                    |                   |                     |                    |                     |                    |                    |                    |                       |                    |                 |                   |                      |                             |                             |                 |                     |                   |   |
|                                  | productivity losses                                                                                                                                               |                    |                     |                    |                   |                     |                    | x                   |                    |                    |                    |                       |                    |                 |                   |                      |                             |                             |                 |                     | x                 |   |
|                                  | decreased workforce participation, employment participation                                                                                                       |                    |                     |                    |                   |                     |                    | x                   |                    |                    |                    |                       |                    |                 |                   |                      |                             |                             |                 |                     | x                 |   |
|                                  | decreased wages                                                                                                                                                   |                    |                     |                    |                   |                     |                    |                     |                    |                    |                    |                       |                    |                 |                   |                      |                             |                             |                 |                     | x                 |   |
|                                  | Tax losses, Steuernachlass                                                                                                                                        |                    |                     |                    |                   |                     |                    | x                   |                    |                    |                    |                       |                    |                 |                   |                      | x                           | x                           |                 |                     |                   |   |
|                                  | loss of family revenue                                                                                                                                            |                    |                     |                    |                   |                     |                    |                     |                    |                    |                    |                       | x                  |                 |                   |                      |                             |                             |                 |                     |                   |   |
|                                  | loss of income                                                                                                                                                    |                    |                     |                    |                   |                     |                    |                     |                    |                    |                    |                       | x                  |                 |                   |                      |                             |                             |                 |                     |                   |   |
|                                  | time-losses of caregivers                                                                                                                                         |                    |                     |                    |                   |                     |                    | x                   |                    |                    |                    |                       | x                  |                 |                   |                      |                             |                             |                 |                     |                   |   |
|                                  | absenteeism/presenteeism                                                                                                                                          |                    |                     |                    |                   |                     |                    | x                   |                    |                    |                    |                       |                    |                 |                   |                      |                             |                             |                 |                     |                   |   |
| <b>intangible effects</b>        |                                                                                                                                                                   |                    |                     |                    |                   |                     |                    |                     |                    |                    |                    |                       |                    |                 |                   |                      |                             |                             |                 |                     |                   |   |
|                                  |                                                                                                                                                                   |                    |                     |                    |                   |                     |                    | x                   |                    |                    |                    |                       |                    |                 |                   |                      |                             |                             |                 |                     | x                 |   |



**THE ECONOMIC BURDEN OF VISUAL IMPAIRMENT AND  
BLINDNESS - A Systematic Review**

|                                    |                                                                                                                                                     |
|------------------------------------|-----------------------------------------------------------------------------------------------------------------------------------------------------|
| Journal:                           | <i>BMJ Open</i>                                                                                                                                     |
| Manuscript ID:                     | bmjopen-2013-003471.R1                                                                                                                              |
| Article Type:                      | Research                                                                                                                                            |
| Date Submitted by the Author:      | 28-Aug-2013                                                                                                                                         |
| Complete List of Authors:          | Köberlein, Juliane; University of Wuppertal,<br>Beifus, Karolina<br>Schaffert, Corinna<br>Finger, Robert; University of Bonn, Dept of Ophthalmology |
| <b>Primary Subject<br>Heading</b>: | Ophthalmology                                                                                                                                       |
| Secondary Subject Heading:         | Health economics                                                                                                                                    |
| Keywords:                          | visual impairment, blindness, cost of illness, HEALTH ECONOMICS                                                                                     |
|                                    |                                                                                                                                                     |

SCHOLARONE™  
Manuscripts

# THE ECONOMIC BURDEN OF VISUAL IMPAIRMENT AND BLINDNESS - A Systematic Review

*Juliane Köberlein<sup>1\*</sup>, Karolina Beifus<sup>1\*</sup>, Corinna Schaffert<sup>1</sup>, Robert P. Finger<sup>2</sup>*

Contact Address:

Juliane Köberlein, PhD

Karolina Beifus

Department of Health Economics und Health Care Management

University of Wuppertal

Rainer-Gruenter-Str. 21

42119 Wuppertal

Tel: +49 (0)202 439 1388

Fax: +49 (0)202 439 1384

e-mail: koeberlein@wiwi.uni.wuppertal.de

<sup>1</sup>Department of Health Economics und Health Care Management

University of Wuppertal

Germany

<sup>2</sup>Department of Ophthalmology, University of Bonn, Bonn, Germany

and

Centre of Eye Research Australia, Royal Victorian Eye and Ear Hospital,

University of Melbourne, Melbourne, Australia

\*JK and KB contributed equally to this article

**Keywords:** visual impairment, blindness, costs of illness, health economics

**Word Count:** 3450

## ABSTRACT

### Objectives

Visual impairment and blindness (VI&B) cause a considerable and increasing economic burden in all high income countries due to population ageing. Thus we conducted a review of the literature to better understand all relevant costs associated with VI&B and to develop a multi-perspective overview.

### Design

Systematic review. Two independent reviewers searched relevant literature and assessed studies for inclusion and exclusion criteria as well as quality.

### Eligibility criteria for included studies

Interventional, non-interventional and cost of illness studies, conducted prior to May 2012, investigating direct and indirect costs as well as intangible effects related to visual impairment and blindness were included.

### Methods

We followed the PRISMA statement approach to identify relevant studies. A meta-analysis was not performed due to the variability of reported cost categories and varying definition of visual impairment.

### Results

A total of 22 studies were included. Hospitalization and use of medical services around diagnosis and treatment at the onset of VI&B were the largest contributor to direct medical costs. Mean annual expenses per patient were found to be US\$ PPP 12,175-14,029 for moderate visual impairment, US\$ PPP 13,154-16,321 for severe visual impairment, and US\$ PPP 14,882-24,180 for blindness, almost twofold the costs for non-blind patients. Informal care was the major contributor to other direct costs, with the time spent by caregivers increasing from 5.8 hours/week (or US\$ PPP 263) for persons with vision > 20/32 up to 94.1 hours/week (or US\$ PPP 55,062) for persons with vision ≤ 20/250. VI&B caused considerable indirect costs due to productivity losses, premature mortality, and dead weight losses.

### Conclusions

VI&B cause a considerable economic burden for affected persons, their care givers and society at large, which increases with the degree of visual impairment. This review provides insight into the distribution of costs and the economic impact of VI&B.

## ARTICLE SUMMARY

### Article Focus

- To explore all relevant costs associated with visual impairment and blindness.

### Key Message

- We could demonstrate a considerable impact of visual impairment and blindness in terms of the associated direct and indirect costs, as well as intangible effects such as loss of well-being, independence and excess mortality.
- A large proportion of the direct costs reported in reviewed studies are not directly related to eye-related medical care, but to falls and other accidents due to visual impairment, exacerbation of diabetes due to a reduced ability to self-manage, depression related to loss of vision and further excess morbidity.
- All identified costs as well as intangible effects correlated with the degree of visual impairment with highest expenditures associated with blindness.

### Strengths and limitations

- This is the first international and multi-perspective overview of costs and intangible effects associated with visual impairment as well as blindness.
- The study synthesis of reviewed literature was limited as no two studies used the same methodology, reported exactly the same outcomes or used the same sample population. Therefore a meta-analysis could not be conducted.

## INTRODUCTION

Visual impairment and blindness are foremost a problem of older age in all high-income countries, and constantly increasing due to the ageing of populations [1]. Globally, the burden of disease related to vision disorders has increased by 47% from 12,858,000 Disability Adjusted Life Years (DALYs) in 1990 to 18,837,000 DALYs in 2010 [2]. In high-income countries, health-related quality of life in severely visually impaired persons has been shown to be similar or even lower and emotional distress higher compared with other serious chronic health conditions such as stroke or metastasised solid tumours [3]. Blindness and visual impairment impact not only the affected individual but also the family, caregivers and the community, leading to a significant cost burden. In Australia, the overall cost placed visual disorders seventh among diseases, ahead of coronary heart disease, diabetes, depression, and stroke in terms of economic burden on the health system [4].

As demands on healthcare continue to increase in all high-income countries, economic evaluations of disease, impairment and interventions have also become increasingly important [5]. This necessitates a clear understanding of all aspects of the direct and indirect costs and intangible effects related to blindness and severe visual impairment, as almost all interventions in this area are aiming to prevent these and are often measured as an incremental cost effectiveness ratio (ICER), i.e. the difference in cost compared to the difference in effectiveness. Similarly, faced with increasing demand and limited resources in healthcare, these resources need to be prioritized which again calls for a clear understanding of the economic impact of a disease or disorder. Against this background we conducted a systematic review of the literature, collating all data available on the economic impact of visual impairment and blindness.

## METHODS

The systematic review was conducted as suggested in the PRISMA statement which aims to improve the quality of systematic reviews by providing guidance and a 27-item checklist to aid in structuring methods and improving the reporting of results. It focuses on randomized trials, but can also be used as a basis for reporting systematic reviews of other types of research, for example health economic evaluation studies. However the checklist should not be used as a quality assessment instrument to measure the quality of included studies or the performed systematic review [47]. The completed PRISMA checklist for this review can be found in appendix three.

## Literature search

All economical and medical databases were searched from May to June 2012 via PubMed and OVID using the following terms:

*“low vision”, “visual impairment”, “visually impaired”, “blindness”, “blind”, “visual loss”, “costs”, “costs of illness”.*

Subsequently, a second search was conducted using the main causes of visual impairment and blindness. Search terms were: *“low vision”, “visual impairment”, “visually impaired”, “blindness”, “blind”, “visual loss”, “costs”* combined with *“age-related macular degeneration”, “glaucoma”, “diabetic retinopathy”, “cataract”, “corneal opacities”, “childhood blindness”* separated by *“or”*.

Supplemental sources including references contained in identified articles were used in addition.

Two independent researchers screened identified articles using the following inclusion or exclusion criteria:

### Inclusion:

- data for direct and indirect costs related to visual impairment and blindness. Cost-of-illness – or in this case cost-of-impairment – studies can be divided into disease-specific and general studies. Both types of studies were included if they contained relevant data,
- studies with outcomes related to intangible effects due to visual impairment and blindness,
- overall data for burden of illness related to affected persons and carers.

### Exclusion:

- costs pertaining to underlying diseases only with no specification of visual impairment levels,
- economic studies conducted in developing countries.

As we were interested in the burden of VI&B in high-income countries only, we excluded economic studies conducted in developing countries. Health services provision and treatment options differ vastly between high-income and middle- or low-income countries, making a comparison of cost categories unfeasible.

## Cost classification

All included articles were assessed as to which cost aspects they reported. Broadly, costs were divided into direct costs, indirect costs, and intangible effects [6].

1  
2  
3 Direct costs are defined as the actual expenses related to an illness and contain medical  
4 costs, non-medical costs and other direct costs [5]. Medical costs measure the cost of re-  
5 sources used for treating a particular illness. Non-medical costs are costs caused by the dis-  
6 ease but not attributed to medical treatment. In case of visual impairment and blindness the-  
7 se are supporting services, assistive devices, home care, residential care or transportation  
8 (travel expenses). Other direct costs comprise informal care, time spent in treatment by pa-  
9 tients or caregivers, or time spent in rehabilitation, training, self-help groups or preventative  
10 activities [5].

11  
12 Indirect costs are defined as the value of lost output caused by reduced productivity due to  
13 illness or disability [7]. Both, patients and caregivers are affected by indirect costs due to  
14 allowances (financial support for income, residence, benefits), productivity losses (absentee-  
15 ism, salary losses, part-time employment, loss of work), and dead weight losses as well as  
16 years of life lost. Dead weight loss, also known as an excess burden, is not a clearly defined  
17 concept. In a purely economic sense, deadweight loss describes the costs to society created  
18 by market inefficiency. In the context of our study we refer to it as an excess financial burden  
19 on society caused by VI&B.

20  
21 Intangible costs or effects refer to the burden of illness of affected persons and caregivers,  
22 and comprise amongst others loss of well being or loss of quality of life. It can be captured  
23 using questionnaires and expressed in DALYs. As this aspect of costs is difficult to quantify,  
24 DALYs or other measures of intangible effects are rarely assigned a monetary value.

25  
26 Commonly, cost categories considered in a particular study depend on the perspective the  
27 study is conducted from, i.e. a healthcare payer's (direct medical and non-medical costs on-  
28 ly) or the patient's perspective, or a societal perspective (all costs).

29  
30 As cost categories varied considerably between all cost-of-illness studies all different direct  
31 and indirect cost categories were listed in appendix two prior to being categorized into our  
32 broader categories as outlined above.

### 33 34 35 36 37 38 39 40 41 42 43 44 45 Quality of included studies

46  
47 A checklist, based on the assessment tool of Emmert and colleagues [8] and extended by  
48 several questions covering relevant cost-of-illness aspects (see **Appendix 1**), was generated  
49 to assess the overall quality of included studies reporting direct or indirect costs of illness.  
50 The checklist contained sections on the study design, population, definition and specification  
51 of cost data and its limitations, including a total of 25 questions. Studies were rated from 0 –  
52 100 for each of these categories. Two independent reviewers conducted the assessment and  
53 interrater-reliability was assessed using Kappa ( $\kappa_n$ ) as suggested by Brennan and Prediger  
54 [9] for every study. The interpretation of agreement was based on the agreement scale by  
55  
56  
57  
58  
59  
60



1  
2  
3 Landis and Koch [10]. which indicates fair agreement at Kappa levels between 0.21 and  
4 0.40, moderate agreement between 0.41 and 0.60, substantial between 0.61 and 0.80 and  
5 almost perfect agreement 0.81 and above.  
6  
7

### 8 9 Conversion of Cost-of-illness study results

10 For better comparison of costs across studies, the data were transformed: (1) costs were  
11 inflated to 2011 using country specific gross domestic product deflator, which takes fluctuat-  
12 ing exchange rates, different purchasing power of currencies and the rate of inflation into  
13 account [11 12], and (2) converted to USD using purchasing power parities (PPP) [13]. Pur-  
14 chasing power parities account for differences in price levels between countries, and convert  
15 local currencies into international dollars taking purchasing power of different national cur-  
16 rencies into account and eliminating differences in price levels between countries. The trans-  
17 formed values are presented in million units (million US\$-PPP) for total expenditures report-  
18 ed and in US\$-PPP for costs per person.  
19  
20  
21  
22  
23  
24  
25  
26

## 27 RESULTS

28 The search yielded a total of 390 articles. After applying all inclusion and exclusion criteria,  
29 22 studies were included in the systematic review (**Figure 1**). Altogether there were nine  
30 studies conducted in the USA, six studies conducted in Australia, two studies from France  
31 and Canada, and one study from each of the following countries: Germany,, the UK, Japan..  
32  
33 All included studies are summarized in **Table 1**.  
34  
35  
36  
37  
38  
39  
40  
41  
42  
43  
44  
45  
46  
47  
48  
49  
50  
51  
52  
53  
54  
55  
56  
57  
58  
59  
60

Table 1: Characteristics of included studies

| Author                                                                | Country   | Design and Population                                                                                                                                                                                                                                                                                                                                                                                                      | Cost components evaluated                                                          | Objective                                                                                                                                       | Vision categories                                                                         |
|-----------------------------------------------------------------------|-----------|----------------------------------------------------------------------------------------------------------------------------------------------------------------------------------------------------------------------------------------------------------------------------------------------------------------------------------------------------------------------------------------------------------------------------|------------------------------------------------------------------------------------|-------------------------------------------------------------------------------------------------------------------------------------------------|-------------------------------------------------------------------------------------------|
| Bramley et al. 2008 [14]                                              | USA       | retrospective cohort analysis of nationally representative Medicare 5% random sample; patients older than 65 years with newly diagnosed glaucoma; regression analysis                                                                                                                                                                                                                                                      | direct medical costs, intangible effects                                           | to measure costs of visual impairment due to progressing glaucoma                                                                               | no vision loss, moderate vision loss, severe vision loss, blindness                       |
| Brezin et al. 2005 [15]                                               | France    | national survey of a random stratified sample; 16, 945 affected persons answered questionnaires; 4,091 caregiver answered questionnaires;                                                                                                                                                                                                                                                                                  | indirect costs; intangible effects                                                 | to document the prevalence of self-reported visual impairment and its association with disabilities, handicaps, and socioeconomic consequences. | blind or light perception only, low vision, other visual problems, and no visual problems |
| Chou et al. 2006 [16]                                                 | Australia | 150 persons completed cost diaries for 12 months and were evaluated; costs categorized into four sections: 1. medicines, products and equipment, 2. health and community services, 3. informal care and support, 4. other expenses                                                                                                                                                                                         | direct medical costs, direct non-medical costs                                     | to describe and evaluate the process used to collect personal costs (out-of-pocket) associated with vision impairment using diaries             | ≥ 6/12with restricted fields; <6/12–6/18; <6/18–6/60; <6/60–3/60; <3/60                   |
| Clarke et al. 2003 [17]                                               | UK        | regression-based approach to estimate the short-term and long-term annual hospital and non-hospital costs associated with seven major diabetes-related complications in the UK Prospective Diabetes Study (UKPDS): myocardial infarction (MI); stroke, angina or ischemic heart disease (IHD); heart failure; blindness in one eye; amputation and cataract extraction; 5102 patients with newly diagnosed type 2 diabetes | direct medical costs                                                               | to estimate the immediate and long-term healthcare costs associated with seven diabetes-related complications                                   | blind in one eye                                                                          |
| Cruess et al. 2011 [18] (in combination with Gordon et al. 2011 [19]) | Canada    | prevalence-based approach, population projections for the whole population were compiled using data from the Statistics Canada 2006 Population Projections for Canada, Provinces and Territories 2001-2031                                                                                                                                                                                                                 | direct medical costs, direct non medical costs, indirect costs, intangible effects | to investigate costs of vision loss in Canada to inform healthcare planning                                                                     | no details                                                                                |
| Frick et al. 2008 [20]                                                | USA       | retrospective cohort study; patients with blindness matched to non-blind selected from managed care claims database                                                                                                                                                                                                                                                                                                        | direct medical costs                                                               | to evaluate total and condition related charges incurred by blind patients in a managed care population in the US                               | blind, non blind                                                                          |

|                                                 |                          |           |                                                                                                                                                                                                                                          |                                                                                        |                                                                                                                                                                                     |                                                                                                |
|-------------------------------------------------|--------------------------|-----------|------------------------------------------------------------------------------------------------------------------------------------------------------------------------------------------------------------------------------------------|----------------------------------------------------------------------------------------|-------------------------------------------------------------------------------------------------------------------------------------------------------------------------------------|------------------------------------------------------------------------------------------------|
| 1<br>2<br>3<br>4<br>5<br>6<br>7<br>8<br>9<br>10 | Frick et al. 2007 [21]   | USA       | data from the medical expenditure panel survey 1996 – 2002 for adults older than 40 years with visual impairment or blindness                                                                                                            | direct medical costs; direct non medical costs; other direct costs; intangible effects | to estimate the economic impact of visual impairment and blindness in persons aged 40 years and older in the US                                                                     | visual impairment; blindness                                                                   |
| 11<br>12<br>13<br>14                            | Javitt et al. 2007 [22]  | USA       | retrospective cohort analysis of nationally representative Medicare 5% random sample, excluding Medicare managed-care enrollees                                                                                                          | direct medical costs                                                                   | to assess and identify the costs to the Medicare program for patients with either stable or progressive vision loss and estimate the impact on eye-related and non-eye related care | mild, moderate, severe vision loss (VA $\leq$ 20/200), blindness (VA $\leq$ 20/400)            |
| 15<br>16<br>17<br>18<br>19                      | Keeffe et al. 2009 [23]  | Australia | 114 participants of the Melbourne Visual Impairment Project completed diaries for 12 month; the burden of caregiver and opportunity costs for losses in work time was calculated (in combination with methods and data from Chou et.al.) | other direct costs                                                                     | to analyse prospective data on providers, types and costs of care for people with impaired vision in Australia                                                                      | VA < 20/40                                                                                     |
| 20<br>21<br>22<br>23                            | Kymes et al. 2010 [24]   | USA       | decision analytic approach; Markov model to replicate health events over the remaining lifetime of someone newly diagnosed with glaucoma                                                                                                 | incremental costs of illness                                                           | to evaluate the incremental cost of primary open-angle glaucoma considering both visual and non-visual medical costs over a lifetime                                                | no details                                                                                     |
| 24<br>25<br>26<br>27<br>28<br>29                | Lafuma et al. 2006 [25]  | France    | interviews with sample population (665,000) from a national survey of persons living in institutions or in the community (with caregiver at home)                                                                                        | direct non medical costs, other direct costs, indirect costs                           | to estimate the annual national non medical costs due to visual impairment and blindness                                                                                            | blind (light perception), low vision (better than light perception??, low vision, and controls |
| 30<br>31<br>32<br>33                            | McCarty et al. 2001 [26] | Australia | population-based study; evaluation of the data from Melbourne Visual impairment project; population $\geq$ 40 years was analyzed in causes of death                                                                                      | intangible effects                                                                     | to describe predictors of mortality in the 5 year follow up of Melbourne Visual impairment project;                                                                                 | visual acuity < 6/12                                                                           |
| 34<br>35<br>36<br>37                            | Morse et al. 1999 [27]   | USA       | 2.552.350 discharges from hospital in state of NY -> 5.764 patients had visual impairment                                                                                                                                                | direct medical costs                                                                   | to assess whether visual impairment contributes to average length of stay within inpatient care facilities                                                                          | no details                                                                                     |
| 38<br>39<br>40<br>41<br>42<br>43<br>44<br>45    | Porz et al. 2010 [28]    | Germany   | retrospective study of 66 patients using a cost and a vision-related quality of life questionnaire (Impact of vision Impairment                                                                                                          | direct non medical costs, intangible                                                   | to capture costs for medicines, aids and equipment, support in everyday life and social bene-                                                                                       | Visual acuity (VA) $\geq$ 0,3, Visual acuity < 0,3                                             |

|                          |           |                                                                                                                                                                                                                                           |                                                                                       |                                                                                                                                                                                                                                                                                                              |                                                                                                                                          |
|--------------------------|-----------|-------------------------------------------------------------------------------------------------------------------------------------------------------------------------------------------------------------------------------------------|---------------------------------------------------------------------------------------|--------------------------------------------------------------------------------------------------------------------------------------------------------------------------------------------------------------------------------------------------------------------------------------------------------------|------------------------------------------------------------------------------------------------------------------------------------------|
|                          |           | questionnaire)                                                                                                                                                                                                                            | effects                                                                               | fits, as well as vision- related quality of life                                                                                                                                                                                                                                                             |                                                                                                                                          |
| Rein, et al. 2006 [29]   | USA       | private insurance and Medicare claims data                                                                                                                                                                                                | direct non medical costs, indirect costs                                              | to estimate the societal economic burden and the governmental budgetary impact of the following visual disorders among US adults aged 40 years and older: visual impairment, blindness, refractive error, age-related macular degeneration, cataracts, diabetic retinopathy, and primary open angle glaucoma | refractive errors                                                                                                                        |
| Roberts et al. 2010 [30] | Japan     | prevalence-based approach; adopted using data on visual impairment, the national health system, and indirect costs                                                                                                                        | direct medical costs, direct non medical costs, indirect costs and intangible effects | to quantify the total economic cost of visual impairment in Japan                                                                                                                                                                                                                                            | low vision 6/12-6/60;<br>blind < 6/60;<br>visual impairment = >6/12                                                                      |
| Schmier et al. 2009 [31] | USA       | using a questionnaire that included items on demographic and clinical characteristics and on the use of services, assistive devices, and caregiving; 761 persons were included                                                            | direct non medical costs, other direct costs                                          | to assess the use of devices and caregiving among individuals with diabetic retinopathy and to evaluate the impact of visual acuity on use                                                                                                                                                                   | group 1 (20/20 or better),<br>group 2 (20/ 25–20/30),<br>group 3 (20/40–20/50),<br>group 4 (20/60–20/70), or<br>group 5 (20/80 or worse) |
| Schmier et al. 2006 [32] | USA       | survey with interviews on Daily Living Tasks Dependent on Vision Questionnaire;803 respondents                                                                                                                                            | other direct costs,                                                                   | to assess the patient-reported use of caregiving among individuals with age-related macular degeneration (AMD) and evaluation of impact of visual impairment level on this use                                                                                                                               | 1. VA > 20/32;<br>2. VA 20/32 - > 20/50;<br>3. VA 20/50 - >20/80;<br>4. VA 20/80 - > 20/150;<br>5. 20/150 - >20/250;<br>6. VA ≤ 20/250   |
| Vu, et al. 2005 [33]     | Australia | stratified random sample of 3040 participants from the Melbourne Visual Impairment Project; 2530 attended the follow-up study                                                                                                             | intangible effects                                                                    | to investigate whether unilateral vision loss reduces any aspects of quality of life in comparison with normal vision                                                                                                                                                                                        | unilateral and bilateral vision loss (correctable and non-correctable)                                                                   |
| Wong et al. 2008 [34]    | Australia | prospective cohort study; participants of any age to complete a diary for 12 months answering four categories: 1) medicines, products and equipment, 2) health and community services, 3) informal care and support and 4) other expenses | direct costs (medical and non medical), other direct costs                            | to determine the personal out-of-pocket costs of visual impairment and to examine the expenditure pattern related to eye diseases and the severity of visual impairment                                                                                                                                      | visual acuity ≥6/18 with constricted. fields;<br>< 6/18-6/60;<br>< 6/60                                                                  |

1  
2  
3  
4  
5  
6  
7  
8  
9  
10  
11  
12  
13  
14  
15  
16  
17  
18  
19  
20  
21  
22  
23  
24  
25  
26  
27  
28  
29  
30  
31  
32  
33  
34  
35  
36  
37  
38  
39  
40  
41  
42  
43  
44  
45  
46  
47  
48  
49

|                          |           |                                                                                                    |                                                   |                                                                                                                                          |                                                                               |
|--------------------------|-----------|----------------------------------------------------------------------------------------------------|---------------------------------------------------|------------------------------------------------------------------------------------------------------------------------------------------|-------------------------------------------------------------------------------|
| Wood et al. 2011<br>[35] | Australia | 76 community-dwelling individuals with a range of severity of AMD; completing a diary for 12 month | intangible effects;<br>costs of adverse<br>events | to explore the relationship between AMD, fall<br>risk, and other injuries and identified visual risk<br>factors for these adverse events | binocular visual acuity,<br>contrast sensitivity, and<br>merged visual fields |
|--------------------------|-----------|----------------------------------------------------------------------------------------------------|---------------------------------------------------|------------------------------------------------------------------------------------------------------------------------------------------|-------------------------------------------------------------------------------|

For peer review only

1  
2  
3 All 17 of 22 studies dealing with direct or indirect costs of illness were rated above 50 for all  
4 four main quality aspects, indicating a sufficient level of quality, and consequently were in-  
5 cluded into the review (see **Figure 2**). The interrater-reliability was consistently high and only  
6 a few discrepancies had to be settled by a discussion between the two raters. Kappa scores  
7 ranged from 0.34 to 0.76 (**Figure 3**).  
8  
9

10  
11 Of all included studies twelve captured direct medical cost, ten direct non-medical costs, and  
12 six other direct costs. Six studies report data on indirect costs and ten on intangible effects.  
13 All cost components reported by studies within each cost category are summarized in **Ap-  
14 pendix 2**, highlighting the considerable variability in obtaining and reporting cost aspects  
15 related to visual impairment and blindness between all studies.  
16  
17  
18  
19

### 20 21 22 Direct medical costs

23 Direct medical costs occurred mostly due to hospitalization, the use of medical services and  
24 medical products, and were reported either as incremental costs or, in some studies, provid-  
25 ed as the length of hospital stay (**Table 2**).  
26  
27

28 At the onset of visual impairment and blindness, the two major contributors to direct medical  
29 costs are hospitalizations and costs due to increased use of medical services around diag-  
30 nosis and treatment [17 18 20 21 27 30]. Costs related to recurrent hospitalizations and on-  
31 going, but less frequent use of medical services, remain major cost components in persons  
32 with visual impairment and blindness in the long term. Costs related to drugs, however, did  
33 not emerge as a major direct cost factor [16 34]. All identified costs correlated with the de-  
34 gree of visual impairment leading to the highest expenditures being associated with blind-  
35 ness. The considerable differences in study methods and reported outcomes makes a head  
36 to head comparison of results by study or country or aggregation of data in terms of meta-  
37 analyses for direct medical costs very difficult. Several studies based on representative sam-  
38 ples of Medicare beneficiaries in the USA reported mean annual expenses per patient to be  
39 US\$ PPP 12,175-14,029 for moderate visual impairment, US\$ PPP 13,154-16,321 for severe  
40 visual impairment, and US\$ PPP 14,882-24,180 for blindness, which is almost a 100% ex-  
41 cess of the estimated mean annual cost for non-blind patients at the upper end of the range  
42 (**Table 2**).  
43  
44  
45  
46  
47  
48  
49  
50  
51  
52  
53  
54  
55  
56  
57  
58  
59  
60

Table 2: Results for direct medical costs.

| Study                                        | cost outcomes                                                                                                                                        | US\$ PPP in 2011        |
|----------------------------------------------|------------------------------------------------------------------------------------------------------------------------------------------------------|-------------------------|
| Bramley et al. 2008 <sup>14</sup>            | annual costs per patient compared in degrees of vision impairment from no vision loss and onset of moderate or severe vision impairment or blindness |                         |
|                                              | no vision loss <b>US\$ 8,157</b>                                                                                                                     | <b>8,695</b>            |
|                                              | moderate visual impairment <b>US\$13,162</b>                                                                                                         | <b>14,029</b>           |
|                                              | severe visual impairment <b>US\$ 15,312</b>                                                                                                          | <b>16,321</b>           |
|                                              | blindness <b>US\$ 18,670</b>                                                                                                                         | <b>19,900</b>           |
| Frick et al. 2007 <sup>21</sup>              | total expenditures on health care in blind and visual impaired persons ≥ 40 years                                                                    |                         |
|                                              | blindness <u>individual</u> excess medical expenditures <b>US\$ 2,157</b>                                                                            | <b>2,621</b>            |
|                                              | <u>total</u> excess medical expenditures <b>US\$ 2,454 million</b>                                                                                   | <b>2,982 million</b>    |
|                                              | visual impairment <u>individual</u> excess medical exp. <b>US\$ 1,037</b>                                                                            | <b>1,260</b>            |
|                                              | <u>total</u> excess medical expenditure <b>US\$ 2,661 million</b>                                                                                    | <b>3,233 million</b>    |
|                                              | total annual monetary impact for VI and blindness (primary owing to home care) <b>US\$ 5,100 million</b>                                             | <b>6,197 million</b>    |
| Frick et al. 2008 <sup>20</sup>              | cohort with legally blind patients matched to equal sample cohort with non-blind patients (annual costs per patient in the first year)               |                         |
|                                              | blind persons mean costs <b>US\$ 20,677</b>                                                                                                          | <b>24,180</b>           |
|                                              | median costs <b>US\$ 6,854</b>                                                                                                                       | <b>8,015</b>            |
|                                              | non blind mean costs <b>US\$ 13,321</b>                                                                                                              | <b>15,578</b>           |
|                                              | median costs <b>US\$ 371</b>                                                                                                                         | <b>434</b>              |
| Javitt et al. 2007 <sup>22</sup>             | patients with normal vision compared to moderate or severe visual impairment or blindness regarding eye-related and non-eye-related care             |                         |
|                                              | mean annual costs for eye-related care                                                                                                               |                         |
|                                              | normal vision <b>US\$ 370</b>                                                                                                                        | <b>445</b>              |
|                                              | moderate visual impairment <b>US\$ 345</b>                                                                                                           | <b>415</b>              |
|                                              | severe visual impairment <b>US\$ 407</b>                                                                                                             | <b>490</b>              |
|                                              | blindness <b>US\$ 237</b>                                                                                                                            | <b>285</b>              |
|                                              | mean annual values for non eye related costs                                                                                                         |                         |
|                                              | normal vision <b>US\$ 7,928</b>                                                                                                                      | <b>9,537</b>            |
| moderate visual impairment <b>US\$ 2,193</b> | <b>2,638</b>                                                                                                                                         |                         |
| severe visual impairment <b>US\$ 3,301</b>   | <b>3,971</b>                                                                                                                                         |                         |
| blindness <b>US\$ 4,443</b>                  | <b>5,345</b>                                                                                                                                         |                         |
| Kymes et al. 2010 <sup>24</sup>              | lifetime costs of POAG (primary open-angle glaucoma) to non POAG patients                                                                            |                         |
|                                              | incidence costs <b>US\$ 41,039</b>                                                                                                                   | <b>46,456</b>           |
|                                              | prevalence costs <b>US\$ 19,268</b>                                                                                                                  | <b>21,811</b>           |
|                                              | drug costs <b>US\$ 7,098</b>                                                                                                                         | <b>8,035</b>            |
|                                              | incremental incidence costs <b>US\$ 27,326</b>                                                                                                       | <b>30,933</b>           |
|                                              | incremental prevalence costs <b>US\$ 5,555</b>                                                                                                       | <b>6,288</b>            |
|                                              | incremental drug costs <b>US\$ 4,179</b>                                                                                                             | <b>4,731</b>            |
| Morse et al. 1999 <sup>27</sup>              | extension of average length of stay in hospitals due to visual impairment                                                                            |                         |
|                                              | <b>5.2 days</b> longer stay                                                                                                                          |                         |
| Cruess et al. 2011 <sup>18</sup>             | financial burden of vision loss to Canadian health care system                                                                                       |                         |
|                                              | hospital <b>CAN\$ 1,497.7 million</b>                                                                                                                | <b>1,934.72 million</b> |
|                                              | physicians <b>CAN\$ 866.5 million</b>                                                                                                                | <b>1,119.34 million</b> |
|                                              | vision care <b>CAN\$ 3,483.7 million</b>                                                                                                             | <b>4,500.24 million</b> |
| Chou et al. 2006 <sup>16</sup>               | the out-of-pocket expenses for medicines and products per person annually                                                                            |                         |
|                                              | <b>AUS \$ 206</b>                                                                                                                                    | <b>456</b>              |
| Wong et al. 2008 <sup>34</sup>               | annual costs for medicine and products per patient                                                                                                   |                         |
|                                              | Visual acuity (VA) ≥ 6/18 with restr. field <b>AUS\$ 285</b>                                                                                         | <b>632</b>              |
|                                              | < 6/18 – 6/60 = <b>AUS\$ 233</b>                                                                                                                     | <b>516</b>              |
|                                              | < 6/60 = <b>AUS\$ 147</b>                                                                                                                            | <b>326</b>              |
| Clarke et al. 2003 <sup>17</sup>             | short-term and long-term annual hospital and non-hospital costs due to major diabetes-related complications                                          |                         |
|                                              | blindness in one eye (in 20% of patients) <b>£ 4,370</b>                                                                                             | <b>4,086</b>            |
|                                              | mean hospital in-patient costs <b>£ 872</b>                                                                                                          | <b>815</b>              |
| Roberts et al. 2010 <sup>30</sup>            | total economic costs of visual impairment                                                                                                            |                         |
|                                              | General medical expenditure <b>US\$ 8.102 billion</b>                                                                                                | <b>8,636 million</b>    |
|                                              | Inpatient <b>US\$ 1.808 billion</b>                                                                                                                  | <b>1,927 million</b>    |
|                                              | Outpatient <b>US\$ 6.294 billion</b>                                                                                                                 | <b>6,709 million</b>    |
|                                              | Drugs <b>US\$ 1.395 billion</b>                                                                                                                      | <b>1,487 million</b>    |

### Direct non medical costs

Assistive devices and aids, home modifications, costs for health care services like home-based nursing or nursing home placements were the major contributors to direct non-medical costs (**Table 3**). With worsening visual acuity direct non-medical costs for support services and assistive devices increased, from US\$ PPP 53.90 for a person with visual acuity  $\geq 20/20$  up to US\$ PPP 608.71 for a person with visual acuity  $\leq 20/80$  [31]. Nursing home-placements and professional care costs incurred the highest expenditures followed by domestic modifications. These costs however, were highest initially shortly after the loss of vision and in the majority only incurred once (**Table 3**).



Table 3: Results for direct non medical costs.

| Study                             | cost outcomes                                                                                                                                                                                               | US\$ PPP in 2011                               |                       |                      |
|-----------------------------------|-------------------------------------------------------------------------------------------------------------------------------------------------------------------------------------------------------------|------------------------------------------------|-----------------------|----------------------|
| Frick et al. 2007 <sup>21</sup>   | total health care expenditures for adults $\geq$ 40 years (excess costs)                                                                                                                                    |                                                |                       |                      |
|                                   | blindness home health agencies <b>US\$ 4,988</b>                                                                                                                                                            | <b>6060</b>                                    |                       |                      |
|                                   | low vision home health agencies <b>US\$ 3,105</b><br>expenditures for private home health providers was <b>US\$ 1,200 more</b> for blind than visually impaired persons                                     | <b>3,773</b>                                   |                       |                      |
| Rein et al. 2006 <sup>29</sup>    | total annual costs for visual impairment and blindness for adults $\geq$ 40 years                                                                                                                           |                                                |                       |                      |
|                                   | nursing placements of <b>US\$ 10.96 billion</b>                                                                                                                                                             | <b>12,818 million</b>                          |                       |                      |
|                                   | guide dogs <b>US\$ 0.062 billion</b><br>independent living <b>US\$ 0.029 billion</b>                                                                                                                        | <b>72.5 million</b><br><b>33.9 million</b>     |                       |                      |
| Schmier et al. 2009 <sup>31</sup> | annual costs for use of services and devices related to the degree of visual impairment per person                                                                                                          |                                                |                       |                      |
|                                   | devices (glasses, sticks, computer software, etc. <b>US\$ 109.79</b>                                                                                                                                        | <b>120</b>                                     |                       |                      |
|                                   | rehabilitation <b>US\$ 7.09</b>                                                                                                                                                                             | <b>7.78</b>                                    |                       |                      |
| Chou et al. 2006 <sup>16</sup>    | annual costs for health and community services per person                                                                                                                                                   |                                                |                       |                      |
|                                   | health care, home help, personal affairs, personal care, communication, transport, social activities <b>AUS \$ 872</b>                                                                                      | <b>1,932.50</b>                                |                       |                      |
|                                   | expenditure for taxi, public transport, education expenses, guide dog <b>AUS \$ 321</b>                                                                                                                     | <b>711</b>                                     |                       |                      |
| Cruess et al. 2011 <sup>18</sup>  | financial burden of vision loss to Canadian health care system                                                                                                                                              |                                                |                       |                      |
|                                   | care costs <b>CAN\$ 693 million</b>                                                                                                                                                                         | <b>895.21 million</b>                          |                       |                      |
|                                   | aids and modification <b>CAN\$ 305 million</b>                                                                                                                                                              | <b>394 million</b>                             |                       |                      |
| Wong et al. 2008 <sup>34</sup>    | annual personal costs for health and community services and other expenses per patient                                                                                                                      |                                                |                       |                      |
|                                   | median total costs <b>AUS\$ 1,768</b>                                                                                                                                                                       | <b>3,919</b>                                   |                       |                      |
|                                   | mean total costs <b>AUS \$ 3,376</b>                                                                                                                                                                        | <b>7,482</b>                                   |                       |                      |
| Roberts et al. 2010 <sup>30</sup> | total economic costs of visual impairment                                                                                                                                                                   |                                                |                       |                      |
|                                   | meal service on admission <b>US\$ 0.149 billion</b>                                                                                                                                                         | <b>158.81 million</b>                          |                       |                      |
|                                   | home-visit nursing <b>US\$ 0.013 billions</b>                                                                                                                                                               | <b>13.86 million</b>                           |                       |                      |
|                                   | health care administration <b>US\$ 0.475 billion</b>                                                                                                                                                        | <b>506.30 million</b>                          |                       |                      |
|                                   | Community care <b>US\$ 6.608 billion</b>                                                                                                                                                                    | <b>7,043 million</b>                           |                       |                      |
|                                   | Institutional care <b>US\$ 0.238 billion</b><br>Vision aids <b>US\$ 0.2 billion</b>                                                                                                                         | <b>253.68 million</b><br><b>213.18 million</b> |                       |                      |
| Porz et al. 2010 <sup>28</sup>    | financial and psychological burden of retinal diseases divided into health economic relevant categories; annual expenses per person                                                                         |                                                |                       |                      |
|                                   | aids for VA $\geq$ 0.3 = <b>€ 96.65</b>                                                                                                                                                                     | <b>77.39</b>                                   |                       |                      |
|                                   | VA < 0.3 = <b>€ 83.58</b>                                                                                                                                                                                   | <b>66.92</b>                                   |                       |                      |
|                                   | personal assistance VA $\geq$ 0.3 = <b>€ 454.96</b>                                                                                                                                                         | <b>364.28</b>                                  |                       |                      |
|                                   | VA < 0.3 = <b>€ 667.77</b>                                                                                                                                                                                  | <b>534.68</b>                                  |                       |                      |
| Lafuma et al. 2006 <sup>25</sup>  | national survey with estimation on costs of low vision and blindness for persons living in institutions <sup>1</sup> or in the community <sup>2</sup> (declared annually per person and total expenditures) |                                                |                       |                      |
|                                   | <b>low vision</b>                                                                                                                                                                                           | <b>blindness</b>                               | <b>low vision</b>     | <b>blindness</b>     |
|                                   | home modifications <sup>1</sup> <b>€ 36.65 pp/ year</b>                                                                                                                                                     | <b>€ 926.96 pp/ y</b>                          | <b>37.87</b>          | <b>957.90</b>        |
|                                   | <b>€ 3.27 million total</b>                                                                                                                                                                                 | <b>€ 9.63 million total</b>                    | <b>3.375 million</b>  | <b>9.95 million</b>  |
|                                   | devices <sup>1</sup> <b>€ 184.14 pp/ year</b>                                                                                                                                                               | <b>€ 387.35 pp/ y</b>                          | <b>190.29</b>         | <b>400.28</b>        |
|                                   | <b>€ 16.43 million total</b>                                                                                                                                                                                | <b>€ 4.03 million total</b>                    | <b>16.98 million</b>  | <b>4.165 million</b> |
|                                   | home modification <sup>2</sup> <b>€ 42.23 pp/ y</b>                                                                                                                                                         | <b>€ 121.12 pp/y</b>                           | <b>43.64</b>          | <b>125.16</b>        |
|                                   | <b>€ 16.43 million total</b>                                                                                                                                                                                | <b>€ 7.02 million total</b>                    | <b>16.98 million</b>  | <b>7.25 million</b>  |
|                                   | devices <sup>2</sup> <b>€ 376.39</b>                                                                                                                                                                        | <b>€ 363.14 pp/ y</b>                          | <b>388.95</b>         | <b>375.26</b>        |
|                                   | <b>€ 420 million total</b>                                                                                                                                                                                  | <b>€ 21.04 million total</b>                   | <b>434.02 million</b> | <b>21.74 million</b> |
|                                   | paid assistance <sup>2</sup> <b>€ 1,463.59 pp/ y</b>                                                                                                                                                        | <b>€ 6750.66 pp/ y</b>                         | <b>1,512.44</b>       | <b>6,976</b>         |
|                                   | <b>€ 1,635 million</b>                                                                                                                                                                                      | <b>€ 391 million total</b>                     | <b>1,690 million</b>  | <b>404 million</b>   |

### Other direct costs

Six of the included studies reported costs caused by informal care. Time spent on caring for or assisting visually impaired persons was related to the degree of visual impairment, with blind persons requiring the most assistance. The time spent by caregivers ranged from 5.8 hours per week for a person with a visual acuity of > 20/32 and a cost of US\$ PPP 263 up to 94.1 hours per week and costs of US\$ PPP 55,062 for persons with a visual acuity of ≤ 20/250 [32]. All studies differed slightly as to the nature of direct costs assessed. Some studies reported on governmental, out-of-pocket expenses as well as opportunity costs, others considered only one or two of these. The wide range of time and resources spent on informal care provision demonstrates the broad economic impact and considerable burden of informal care provision with concurrent expenses at a personal and societal level. Again, reported cost aspects and methodologies differ considerably, with, for example, Keeffe and colleagues[23] reporting out-of-pocket expenses and Lafuma and colleagues[25] reporting time spent on caring using an hourly rate. The multitude of differing approaches in each study does not allow for a head-to-head comparison but gives a comprehensive impression of the complex cost situation and highlights the importance of providing assistance to visually impaired and blind persons (**Table 4**).

Table 4: Results for other direct costs.

| Study                             | cost outcomes                                                                                                                                                                       |                            | US\$ PPP in 2011      |                    |
|-----------------------------------|-------------------------------------------------------------------------------------------------------------------------------------------------------------------------------------|----------------------------|-----------------------|--------------------|
| Frick et al. 2007 <sup>21</sup>   | the economic impact of blindness and visual impairment on adults ≥ 40 years                                                                                                         |                            |                       |                    |
|                                   | blindness causes mean individual excess informal care days 5.2                                                                                                                      |                            |                       |                    |
|                                   | visual impairment causes mean individual excess informal care days 1.2                                                                                                              |                            |                       |                    |
|                                   | blindness causes total excess informal care costs <b>US\$ 242 million</b>                                                                                                           |                            | <b>294.03 million</b> |                    |
|                                   | visual impairment total excess informal care costs <b>US\$ 124 million</b>                                                                                                          |                            | <b>150.66 million</b> |                    |
| Schmier et al. 2009 <sup>31</sup> | annual costs for caregiver time spent in supporting patients with macular degeneration                                                                                              |                            |                       |                    |
|                                   | <b>US\$ 5,038</b>                                                                                                                                                                   |                            | <b>5,526</b>          |                    |
| Schmier et al. 2006 <sup>32</sup> | annual costs for quantity of caregiver time addicted to the degree of visual impairment per patient diabetic retinopathy                                                            |                            |                       |                    |
|                                   | mean 5.7 hours a day 5 days a week                                                                                                                                                  |                            |                       |                    |
|                                   | overall amount of <b>US\$ 9572.77</b>                                                                                                                                               |                            | <b>11,194.40</b>      |                    |
| Keeffe et al. 2009 <sup>23</sup>  | personal out-of-pocket expenses regarding the burden of caregiver                                                                                                                   |                            |                       |                    |
|                                   | median annual opportunity costs for worktime spent on caregiving <b>AUS\$ 915</b>                                                                                                   |                            | <b>2,244.60</b>       |                    |
| Wong et al. 2008 <sup>34</sup>    | annual median personal costs for informal care and assistance in activities of daily living                                                                                         |                            |                       |                    |
|                                   | e.g. meal preparing, dressing, shopping, transportation <b>AUS\$ 2,911</b>                                                                                                          |                            | <b>6,451</b>          |                    |
| Lafuma et al. 2006 <sup>25</sup>  | national survey with estimation on costs for time caregiver spent on of low vision and blindness for persons in the community (declared annually per person and total expenditures) |                            |                       |                    |
|                                   | <b>low vision</b>                                                                                                                                                                   | <b>blindness</b>           | <b>low vision</b>     | <b>blindness</b>   |
|                                   | informal care <b>€ 1881.80 pp/ year</b>                                                                                                                                             | <b>€ 7,316.26 pp/ y</b>    | <b>1,944</b>          | <b>7,560.48</b>    |
|                                   | <b>€ 2,101 million total</b>                                                                                                                                                        | <b>€ 424 million total</b> | <b>2,171 million</b>  | <b>438 million</b> |

## Indirect costs

Studies of indirect costs demonstrate high expenditures related to productivity losses, changes in employment (employer and/or area of work), loss of income, premature mortality, and dead weight losses (**Table 5**). Received social allowances were detailed in one study, but not counted towards the overall costs as they were considered transfer costs.[28] One study included the loss of caregivers' time, which is spent on support in terms of productivity loss but also as a loss of personal time and time to engage in leisure activities.[25] Equal to other cost components indirect costs correlated with the degree of visual impairment, with the highest indirect costs reported for blind persons. Compared to all other cost categories indirect costs due to productivity losses, lower employment rates and losses of income in patients as well as caregivers caused the highest economic burden. Annual estimates of productivity losses and absenteeism due to visual impairment and blindness in the USA and Canada range from US\$ PPP 4,974-5,724 million, and are estimated to be US\$ PPP 7,367 million for an overall decrease in workforce participation in the USA (**Table 5**).

**Table 5: Results for indirect costs**

| Study                             | cost outcomes                                                                                                                                                                                                                              | US\$ PPP in 2011      |                   |                  |
|-----------------------------------|--------------------------------------------------------------------------------------------------------------------------------------------------------------------------------------------------------------------------------------------|-----------------------|-------------------|------------------|
| Rein et al. 2006 <sup>29</sup>    | total annual indirect costs caused by visual disorders                                                                                                                                                                                     |                       |                   |                  |
|                                   | decreased work force participation <b>US\$ 6.3 billion</b>                                                                                                                                                                                 | 7,367 million         |                   |                  |
|                                   | decreased wages <b>US\$ 1.73 billion</b>                                                                                                                                                                                                   | 2,023 million         |                   |                  |
| Roberts et al. 2010 <sup>30</sup> | indirect costs for visual impairment and blindness                                                                                                                                                                                         |                       |                   |                  |
|                                   | productivity losses <b>US\$ 4.667 billion</b>                                                                                                                                                                                              | 4,974 million         |                   |                  |
|                                   | lower employment <b>US\$ 4.230 billion</b>                                                                                                                                                                                                 | 4,509 million         |                   |                  |
|                                   | absenteeism <b>US\$ 0.384 billion</b>                                                                                                                                                                                                      | 409 million           |                   |                  |
|                                   | premature mortality <b>US\$ 0.053 billion</b>                                                                                                                                                                                              | 56.5 million          |                   |                  |
| Lafuma et al. 2006 <sup>25</sup>  | national survey with estimation on indirect costs for losses of income in persons with low vision and blindness living in institutions <sup>1</sup> or in the community <sup>2</sup> (declared annually per person and total expenditures) |                       |                   |                  |
|                                   | <b>low vision</b>                                                                                                                                                                                                                          | <b>blindness</b>      | <b>low vision</b> | <b>blindness</b> |
|                                   | losses of incomes <sup>1</sup> € 120.00 pp/y                                                                                                                                                                                               | € 180.00 pp/y         | 124               | 186              |
|                                   | € 10.71 million total                                                                                                                                                                                                                      | € 1.87 million total  | 11.07 million     | 1.93 million     |
|                                   | losses of incomes <sup>2</sup> € 3,912.00 pp/y                                                                                                                                                                                             | € 3,168.00 pp/y       | 4,042             | 3,273            |
|                                   | € 4,369 million total                                                                                                                                                                                                                      | € 183.6 million total | 4,515 million     | 189.72 million   |
| Brezin et al. 2005 <sup>15</sup>  | prevalence and burden of blindness, low vision and visual impairment in the French community (estimation of monthly average value)                                                                                                         |                       |                   |                  |
|                                   | <b>low vision</b>                                                                                                                                                                                                                          | <b>blindness</b>      | <b>low vision</b> | <b>blindness</b> |
|                                   | social allowances € 87                                                                                                                                                                                                                     | € 364                 | 92                | 384              |
|                                   | total household income € 1,525                                                                                                                                                                                                             | € 1,587               | 1,607             | 1,673            |
|                                   | household income no VI € 1,851                                                                                                                                                                                                             |                       | 1,951             |                  |
| Cruess et al. 2011 <sup>18</sup>  | indirect costs for Canada caused by vision loss                                                                                                                                                                                            |                       |                   |                  |
|                                   | employment participation, absenteeism, presenteeism <b>CAN \$ 4,431 million</b>                                                                                                                                                            | 5,724 million         |                   |                  |
|                                   | dead weight losses <b>CAN \$ 1,757 million</b>                                                                                                                                                                                             | 2,270 million         |                   |                  |

## Intangible effects

Most studies used personal burden such as depression, emotional distress, loss of independency, loss of quality of life, limitations in activities of daily living or hazards such as falls and injuries to capture intangible effects of visual impairment and blindness. Two studies, set in Japan and Canada, reported a loss of well being as DALYs and an associated cost of US\$ PPP 51.8 billion and US\$ PPP 15.11 billion per year respectively.[18 30] Every reviewed study reported a high burden caused by multiple individual restrictions in patients and also in caregivers, which was found to be increasing with the degree of visual impairment (**Table 6**). Mortality associated with visual impairment was reported to increase linearly from 4.5% in persons with normal visual acuity ( $\geq 20/20$ ) to 22.2% in blind persons (visual acuity of  $< 20/200$ ) [26]. Measured as a restriction in care givers, Brezin and colleagues [15] reported a increases from 1.6% of caregivers of non-visually impaired persons, who reported restrictions in going out during the day, up to 12% for caregivers of blind patients.

Table 6: Results for intangible effects

| Study                             | Outcomes                                                                                                                                                                                                                                                                                                                                                     |
|-----------------------------------|--------------------------------------------------------------------------------------------------------------------------------------------------------------------------------------------------------------------------------------------------------------------------------------------------------------------------------------------------------------|
| Bramley et al. 2008 <sup>14</sup> | incidences of depression occur in 17% more than patients with no vision loss, placements in nursing homes are demanded in 25.3% more, injuries happen in 33.4% more cases and femur fractures in 67.4% more cases                                                                                                                                            |
| Cruess et al. 2011 <sup>18</sup>  | loss of well-being and loss in quality of life evokes 77,306 DALYs or rather CAN\$ 11.7 billion in 2007 (US\$ PPP 15.11 billion in 2011)                                                                                                                                                                                                                     |
| Vu et al. 2005 <sup>33</sup>      | non-correctable unilateral vision loss was addicted to independent living and reduced safety; bilateral non-correctable vision loss was associated with nursing homes, emotional wellbeing, use of community services, and activities of daily living                                                                                                        |
| Wood et al. 2008 <sup>35</sup>    | increased visual impairment was significantly associated with an increased incidence of falls and other injuries. 54% of participants had at least one fall, 30% had more than fall, and 63% of falls ended in injuries                                                                                                                                      |
| McCarty et al. 2001 <sup>26</sup> | a linear increase of 5-year mortality correlating with degree of visual impairmen was detected; even mild visual impairment is related to a more than twofold risk of death                                                                                                                                                                                  |
| Brezin et al. 2005 <sup>15</sup>  | burden in patients occurs because of inability to undertake daily activities; need of assistance correlates with degree of visual impairment; burden on caregiver was caused by limited by restricted possibilities for going out for different periods or losing social contacts, affected physical and mental welfare and modified professional activities |
| Porz et al. 2010 <sup>28</sup>    | in a questionnaire with score scale 0-100 points patients with VA $\geq 0.3$ achieved 79.32 for mobility and independency, 69.64 for emotional well-being and 73.86 for reading and achievement of information; persons with VA $< 0.3$ were rated with scores 46.84, 61.43, 44.25 respectively                                                              |
| Roberts et al. 2010 <sup>30</sup> | loss of well-being was measured in DALYs; converted into a monetary value this results in total annual costs of US\$ 48.598 billion (US\$ PPP 51.8 billion in 2011) and costs per capita of US\$ 29,690 per year (US\$ PPP 31,647)                                                                                                                           |
| Frick et al. 2007 <sup>21</sup>   | the cases of blindness and visual impairment more than 209,000 QALY were projected to lost each year, this amounts to a monetary value of US\$ 10,000 million (US\$ PPP 12,150 in 2011)                                                                                                                                                                      |

## DISCUSSION

In this first systematic review of costs associated with visual impairment and blindness we could demonstrate a considerable impact of visual impairment and blindness in terms of the associated direct and indirect costs, as well as intangible effects such as loss of well-being, independence and excess mortality. The highest costs are caused by productivity losses in visually impaired and blind persons as well as their carers, followed by formal and informal care giving, recurrent hospitalizations and the use of medical and supportive services in the visually impaired and blind. A much larger economic impact was due to intangible effects such as loss of independence, quality of life and excess morbidity. However, these are very difficult to quantify in monetary terms and only a small number of studies attempted this. All highlighted cost components as well as intangible effects which contribute to the overall economic impact of visual impairment and blindness need to be considered in economic evaluations not only of visual impairment and blindness but also of interventions aimed at averting these, depending on the focus of the economic evaluation.

A large proportion of the direct costs reported in reviewed studies are not directly related to eye-related medical care, but to falls and other accidents due to visual impairment, exacerbation of diabetes due to a reduced ability to self-manage, depression related to loss of vision and further excess morbidity.[22] Drug costs were not a major contributor to overall costs, which is mirrored in studies investigating chronic diseases such as diabetes mellitus, where – despite its ongoing use – hypoglycaemic drugs constitute only a small proportion of overall direct medical costs.[36] Annual mean costs of other potentially incapacitating chronic diseases such as diabetes mellitus (Euros 5,262 or USD 6,889) [36] or the first year after a stroke (USD 14,361)[37] were much lower for diabetes and similar for the stroke estimate compared to mean annual costs of severe visual impairment and blindness.[14 22] This is likely due to the average diabetic not requiring professional care giving of a scale required during the first year after a stroke or in severely visually impaired and blind persons. In severely visually impaired or blind persons, however, these costs are incurred every year following the loss of vision, and do not decrease significantly over the following years unlike reported annual costs for stroke.[37] Javitt and colleagues report all direct medical cost caused by visual impairment to amount to US\$ 2.14 billion in 2003 in all non-institutionalized Medicare beneficiaries 69 years and older, and postulate a much higher cost for the whole of the US population.[22] With the introduction of anti-Vascular-Endothelial-Growth-Factor treatment for a number of potentially blinding eye diseases such as neovascular age-related macular degeneration, diabetic macular edema or macular edema in retinal vein occlusions since all reviewed studies were conducted, the overall direct medical costs associated with visual impairment can be expected to be much higher today. This increase in cost is exacer-



1  
2  
3 bated by the ageing of populations in all developed countries as all major blinding diseases  
4 are age-related.[29]  
5  
6

7  
8 Our finding that indirect costs are much higher than direct costs caused by visual impairment  
9 and blindness is mirrored by virtually all other cost-of-illness studies assessing the economic  
10 impact of diseases or impairments which result in absenteeism and reduced ability to work  
11 [38-39]. Back pain, for example, was found to cause considerable absenteeism and disable-  
12 ment, which – despite its significant hospital cost – lead to indirect cost constituting 93% of  
13 the overall cost in 1991 in the Netherlands.[38] Even in treatment and healthcare resource  
14 intensive chronic diseases such as diabetes mellitus, indirect costs pose more than half of  
15 the overall costs caused by the illness.[39]  
16  
17  
18  
19

20  
21 All studies which assessed intangible effects in economic terms reported these to be the  
22 largest contributor to the overall economic impact of visual impairment and blindness. Con-  
23 sidering the adverse impact of losing vision on quality of life, independence and the ability  
24 to participate in society, this is not surprising. We and others have previously reported that  
25 even mild visual impairment ( $0.3 < \text{LogMAR} < 0.5$ ) has a significant and independent impact on  
26 vision-specific functioning.[40-42] Similarly, emotional well-being is affected in patients with  
27 even mild vision impairment.[41] Depression is considered to result in further functional de-  
28 cline in this group by reducing motivation, initiative and resiliency. [43-45] Even unilateral  
29 vision loss had a measurable impact on falling and some other activities of independent liv-  
30 ing, with increased odds of having problems in many activities of daily life in a study con-  
31 ducted by Vu and colleagues.[33] All this very adversely impacts the ability to participate in  
32 society, and contributes to the considerable economic impact of intangible effects caused by  
33 visual impairment and blindness.  
34  
35  
36  
37  
38  
39  
40  
41

42  
43 There are several limitations which necessitate a careful interpretation of the overall findings.  
44 Using key words to identify relevant literature always bears the potential of a too narrow fo-  
45 cus, and not all relevant literature may have been included. As we were interested in the  
46 economic burden of VI&B in high-income countries, we did not include (uncorrected) refrac-  
47 tive error into our search terms as this is mostly a problem of middle- and low-income coun-  
48 tries, and excluded studies conducted in middle- and low-income countries which limits our  
49 results to high-income countries. Based on the searches conducted, as well as the cross-  
50 searching performed based on references, the authors are confident that the vast majority of  
51 relevant literature could be included. To the authors' knowledge, a standardized quality  
52 checklist has not been used to assess economic evaluations of the impact of visual impair-  
53 ment and blindness prior to inclusion into a systematic review to date. This further increases  
54  
55  
56  
57  
58  
59  
60

1  
2  
3 the overall quality of our review. The study synthesis of reviewed literature was limited as no  
4 two studies used the same methodology, lacking a standardized definition and specification  
5 of cost components (see Appendix 2). Furthermore no two studies reported exactly the same  
6 outcomes or used the same sample population. These problems have been reported for  
7 cost-of-illness - or in this case cost-of-impairment – studies in other areas, and adherence to  
8 existing cost-of-illness study guidelines recommended.[11 12 46] Unfortunately, none of the  
9 reviewed studies seem to have adhered to any of the available international standards, and  
10 thus the overall comparability is limited. Similar to cost-of-illness studies in other areas, stud-  
11 ies are summarized mostly descriptively, or at a high level of aggregation.[11] The same ap-  
12 plies to the chosen categories of visual impairment used in all studies which differ considera-  
13 bly and further limit our ability to collate results (**Table 1**).The perspective (affected person,  
14 healthcare payer, societal) of the study was only described in a minority of studies, and as  
15 highlighted in the results section, most studies were conducted in the USA and Australia,  
16 making inferences to other countries and healthcare systems difficult. However, this is the  
17 only systematic review of the economic impact of visual impairment and blindness to date,  
18 highlighting the very broad economic impact and outlining the considerable scope a compre-  
19 hensive economic evaluation in this area should ideally have.  
20  
21  
22  
23  
24  
25  
26  
27  
28  
29

30 In conclusion, visual impairment and blindness cause a considerable economic burden for  
31 affected persons, their care givers and society at large, which increases with the degree of  
32 visual impairment for all assessed cost categories as well as intangible effects. This review  
33 highlights a large amount of cost categories which should be considered in economic evalua-  
34 tions in eye health, and future cost-of illness or cost-of-impairment studies should adhere to  
35 available guidelines to improve comparability. The review highlights the considerable amount  
36 of resources spent on caring for visually impaired and blind persons in the absence of a cure.  
37  
38  
39  
40  
41  
42

## 43 FINANCIAL DISCLOSURE

44 The study was supported by the German Research Council (DFG FI 1540/5-5, grant to RPF),  
45 by an unconditional grant from Novartis Pharma Germany and by the Australian National  
46 Health and Medical Research Council Centre for Clinical Research Excellence #529923 -  
47 Translational Clinical Research in Major Eye Diseases. CERA receives Operational Infra-  
48 structure Support from the Victorian Government. The funders had no role in study design,  
49 data collection and analysis, decision to publish, or preparation of the manuscript.  
50  
51  
52  
53  
54

## 55 COMPETING INTERESTS

56 Authors declared that there are no competing interests.  
57  
58  
59  
60

## AUTHORS' CONTRIBUTION

All authors contributed to the design of the review, KB and CS searched databases and extracted references, KB, CS and JK collated studies, and KB, JK and RF drafted the manuscript, all authors critically revised the manuscript.

## REFERENCES

For peer review only



1. Finger RP FR, Holz FG, Scholl HP. Incidence of Blindness and Severe Visual Impairment in Germany: Projections for 2030. *Invest Ophthalmol Vis Sci* 2011
2. Murray CJ VT, Lozano R, Naghavi M, Flaymann AD, Michaud C, et al. Disability-adjusted life years (DALYs) for 291 diseases and injuries in 21 regions, 1990-2010: a systematic analysis for the Global Burden of Disease Study 2010. *Lancet* 2012;**380**(9859):2197-223
3. Williams RA TR, Kaplan RM, Brown SI. The psychological impact of macular degeneration. *Archives of Ophthalmology* 1998;**116**(4):514-20
4. Taylor HR, Pezzullo ML, Keffee JE. The economic impact and cost of visual impairment in Australia. *British Journal of Ophthalmology* 2006;**90**(3):272-5
5. Drummond MF. *Methods for the economic evaluation of health care programmes*. 3 ed. Oxford: Oxford University Press, 2005.
6. Luce BR, Anne E. Estimating costs in the economic evaluation of medical technologies. *International Journal of Technology Assessment in Health Care* 1990(6):57–75
7. Ament AES. Cost of illness studies in health care: a comparison of two cases. *Health policy (Amsterdam, Netherlands)* 1993(26)
8. Emmert M, Huber M, Schöffski O. Eine Aggregation von Instrumenten zur Qualitätsbewertung gesundheitsökonomischer Evaluationsstudien. *PharmacoEconomics* 2011(9):11–30
9. Brennan RL, Prediger DJ. Coefficient Kappa: Some uses, misuses, and alternatives. 1981(41):687–99
10. Landis JR, Koch GG. The measurement of observer agreement for categorical data. *Biometrics* 1977(33):159–74
11. The World Bank: GDP deflator - World development Indicators. Access date: 2013-04-08  
Secondary The World Bank: GDP deflator - World development Indicators. Access date: 2013-04-08 2013. <http://data.worldbank.org/indicator/NY.GDP.DEFL.KD.ZG/countries>.
12. Frick KK, S. Lee, P. Matchar, D. Pezzullo, L. Rein, B. Taylor, H. The cost of visual impairment: purposes, perspectives and guidance. *Investigative Ophthalmology & Visual Science* 2010;**51**(4):1801-05
13. OECD. Health policies and data: OECD Health Data 2012, 2012.
14. Bramley T, Peeples P, Walt JG, et al. Impact of vision loss on costs and outcomes in medicare beneficiaries with glaucoma. *Archives of ophthalmology* 2008;**126**(6):849–56 doi: 10.1001/archophth.126.6.849[published Online First: Epub Date]].

- 1  
2  
3 15. Brézin AP, Lafuma A, Fagnani F, et al. Prevalence and burden of self-reported blindness,  
4 low vision, and visual impairment in the french community: A nationwide survey. Archives of  
5 Ophthalmology 2005;**123**(8):1117–24 doi: 10.1001/archophth.123.8.1117[published Online  
6 First: Epub Date]].  
7  
8  
9 16. Chou S-L, Lamoureux E, Keeffe J. Methods for measuring personal costs associated  
10 with vision impairment. Ophthalmic epidemiology 2006;**13**(6):355–63 doi:  
11 10.1080/09286580600966623[published Online First: Epub Date]].  
12  
13 17. Clarke P, Gray A, Legood R, et al. The impact of diabetes-related complications on  
14 healthcare costs: results from the United Kingdom Prospective Diabetes Study (UKPDS  
15 Study No. 65). Diabetic medicine : a journal of the British Diabetic Association  
16 2003;**20**(6):442–50  
17  
18 18. Cruess AF, Gordon KD, Bellan L, et al. The cost of vision loss in Canada. 2. Results.  
19 Canadian journal of ophthalmology 2011;**46**(4):315–18 doi:  
20 10.1016/j.jcjo.2011.06.006[published Online First: Epub Date]].  
21  
22 19. Gordon KD, Cruess AF, Bellan L, et al. The cost of vision loss in Canada. 1.  
23 Methodology. Canadian journal of ophthalmology 2011;**46**(4):310–14 doi:  
24 10.1016/j.jcjo.2011.07.001[published Online First: Epub Date]].  
25  
26 20. Frick KD, Walt JG, Chiang TH, et al. Direct costs of blindness experienced by patients  
27 enrolled in managed care. Ophthalmology 2008;**115**(1):11–17 doi:  
28 10.1016/j.ophtha.2007.02.007[published Online First: Epub Date]].  
29  
30 21. Frick KG, E.W. Kempen, J.H. Wolff, J. Economic Impact of visual impairment and  
31 blindness in the United States. Arch Ophthalmol 2007;**125**:544-50  
32  
33 22. Javitt JC, Zhou Z, Willke RJ. Association between vision loss and higher medical care  
34 costs in Medicare beneficiaries costs are greater for those with progressive vision loss.  
35 Ophthalmology 2007;**114**(2):238–45 doi: 10.1016/j.ophtha.2006.07.054[published Online  
36 First: Epub Date]].  
37  
38 23. Keeffe JE, Chou S-L, Lamoureux EL. The cost of care for people with impaired vision in  
39 Australia. Archives of ophthalmology 2009;**127**(10):1377–81 doi:  
40 10.1001/archophthalmol.2009.242[published Online First: Epub Date]].  
41  
42 24. Kymes SM, Plotzke MR, Li JZ, et al. The increased cost of medical services for people  
43 diagnosed with primary open-angle glaucoma: a decision analytic approach. American  
44 journal of ophthalmology 2010;**150**(1):74–81 doi: 10.1016/j.ajo.2010.01.037[published Online  
45 First: Epub Date]].  
46  
47  
48  
49  
50  
51  
52  
53  
54  
55  
56  
57  
58  
59  
60

- 1  
2  
3 25. Lafuma A, Brezin A, Fagnani F, et al. Nonmedical economic consequences attributable  
4 to visual impairment. *The European Journal of Health Economics* 2006;**7**(3):158–64 doi:  
5 10.1007/s10198-006-0346-1[published Online First: Epub Date]].  
6  
7  
8 26. McCarty CA, Nanjan MB, R TH. Vision impairment predicts 5 year mortality. *British*  
9 *Journal of Ophthalmology* 2001;**85**(3):322–26 doi: 10.1136/bjo.85.3.322[published Online  
10 First: Epub Date]].  
11  
12  
13 27. Morse AR, Yatzkan E, Berberich B, et al. Acute care hospital utilization by patients with  
14 visual impairment. *Archives of ophthalmology* 1999;**117**(7):943–49  
15  
16  
17 28. Porz G, Scholl HPN, Holz FG, et al. Methoden zur Ermittlung persönlicher  
18 Krankheitskosten am Beispiel retinaler Erkrankungen. *Der Ophthalmologe* 2010;**107**(3):216–  
19 22 doi: 10.1007/s00347-009-2036-8[published Online First: Epub Date]].  
20  
21  
22 29. Rein DB, Zhang P, E WK, et al. The economic burden of major adult visual disorders in  
23 the united states. *Archives of Ophthalmology* 2006;**124**(12):1754–60 doi:  
24 10.1001/archophth.124.12.1754[published Online First: Epub Date]].  
25  
26  
27 30. Roberts CB, Hiratsuka Y, Yamada M, et al. Economic cost of visual impairment in Japan.  
28 *Archives of ophthalmology* 2010;**128**(6):766–71 doi:  
29 10.1001/archophthalmol.2010.86[published Online First: Epub Date]].  
30  
31  
32 31. Schmier JK, Covert DW, Matthews GP, et al. Impact of visual impairment on service and  
33 device use by individuals with diabetic retinopathy. *Disability and rehabilitation*  
34 2009;**31**(8):659–65 doi: 10.1080/09638280802239391[published Online First: Epub Date]].  
35  
36  
37 32. Schmier JK, Halpern MT, Covert D, et al. Impact of visual impairment on use of  
38 caregiving by individuals with age-related macular degeneration. *Retina (Philadelphia, Pa*  
39 2006;**26**(9):1056–62 doi: 10.1097/01.iae.0000254890.48272.5a[published Online First: Epub  
40 Date]].  
41  
42  
43 33. Vu HTV, Keeffe JE, McCarty CA, et al. Impact of unilateral and bilateral vision loss on  
44 quality of life. *British Journal of Ophthalmology* 2005;**89**(3):360–63 doi:  
45 10.1136/bjo.2004.047498[published Online First: Epub Date]].  
46  
47  
48 34. Wong EYH, Chou S-L, Lamoureux EL, et al. Personal costs of visual impairment by  
49 different eye diseases and severity of visual loss. *Ophthalmic epidemiology* 2008;**15**(5):339–  
50 44 doi: 10.1080/09286580802227394[published Online First: Epub Date]].  
51  
52  
53 35. Wood JM, Lacherez P, Black AA, et al. Risk of falls, injurious falls, and other injuries  
54 resulting from visual impairment among older adults with age-related macular degeneration.  
55 *Investigative ophthalmology & visual science* 2011;**52**(8):5088–92 doi: 10.1167/iovs.10-  
56 6644[published Online First: Epub Date]].  
57  
58  
59  
60

- 1  
2  
3 36. Koster I, von Ferber L, Ihle P, et al. The cost burden of diabetes mellitus: the evidence  
4 from Germany--the CoDiM study. *Diabetologia* 2006;**49**(7):1498-504 doi: 10.1007/s00125-  
5 006-0277-5[published Online First: Epub Date]].  
6  
7  
8 37. Dewey HM, Thrift AG, Mihalopoulos C, et al. Cost of stroke in Australia from a societal  
9 perspective: results from the North East Melbourne Stroke Incidence Study (NEMESIS).  
10 *Stroke* 2001;**32**(10):2409-16  
11  
12  
13 38. van Tulder MW, Koes BW, Bouter LM. A cost-of-illness study of back pain in The  
14 Netherlands. *Pain* 1995;**62**(2):233-40  
15  
16  
17 39. Henriksson F, Jonsson B. Diabetes: the cost of illness in Sweden. *J Intern Med*  
18 1998;**244**(6):461-8  
19  
20  
21 40. Finger RP, Fenwick E, Chiang PP, et al. The impact of the severity of vision loss on  
22 vision-specific functioning in a German outpatient population - an observational study.  
23 *Graefes Arch Clin Exp Ophthalmol* 2011;**249**(8):1245-53 doi: 10.1007/s00417-011-1646-  
24 4[published Online First: Epub Date]].  
25  
26  
27 41. Finger RP, Fenwick E, Marella M, et al. The impact of vision impairment on vision-  
28 specific quality of life in Germany. *Invest Ophthalmol Vis Sci* 2011;**52**(6):3613-9 doi: iovs.10-  
29 7127 [pii] 10.1167/iov.10-7127[published Online First: Epub Date]].  
30  
31  
32 42. Lamoureux EL, Chong E, Wang JJ, et al. Visual impairment, causes of vision loss, and  
33 falls: the singapore malay eye study. *Invest Ophthalmol Vis Sci* 2008;**49**(2):528-33 doi:  
34 49/2/528 [pii] 10.1167/iov.07-1036[published Online First: Epub Date]].  
35  
36  
37 43. Rovner BW, Casten RJ, Tasman WS. Effect of depression on vision function in age-  
38 related macular degeneration. *Archives of Ophthalmology* 2002;**120**(8):1041-44  
39  
40  
41 44. Tolman J, Hill RD, Kleinschmidt JJ, et al. Psychosocial adaptation to visual impairment  
42 and its relationship to depressive affect in older adults with age-related macular  
43 degeneration. *Gerontologist* 2005;**45**(6):747-53  
44  
45  
46 45. Horowitz A, Reinhardt JP, Boerner K, et al. The influence of health, social support quality  
47 and rehabilitation on depression among disabled elders. *Aging & Mental Health*  
48 2003;**7**(5):342-50  
49  
50  
51 46. Bloom BS, Bruno DJ, Maman DY, et al. Usefulness of US cost-of-illness studies in  
52 healthcare decision making. *Pharmacoeconomics* 2001;**19**(2):207-13  
53  
54  
55 47. Moher D, Liberati A, Tetzlaff J, et al. Preferred reporting items for systematic reviews and  
56 meta-analyses: the PRISMA statement. *PLoS Medicine* 2006; **6**(7): e10000097  
57  
58  
59  
60

1  
2  
3  
4  
5  
6  
7  
8  
9  
10  
11  
12  
13  
14  
15  
16  
17  
18  
19  
20  
21  
22  
23  
24  
25  
26  
27  
28  
29  
30  
31  
32  
33  
34  
35  
36  
37  
38  
39  
40  
41  
42  
43  
44  
45  
46  
47  
48  
49  
50  
51  
52  
53  
54  
55  
56  
57  
58  
59  
60

## FIGURES

Figure 1: Flow chart of the literature search

Figure 2: Quality rating of included studies

Figure 3: Kappa-index per study

For peer review only

1  
2  
3 APPENDIX  
4

5 Appendix 1: Quality checklist  
6

7 Appendix 2: Cost categories reported in included studies.  
8

9 Appendix 3: PRISMA checklist  
10  
11  
12  
13  
14  
15  
16  
17  
18  
19  
20  
21  
22  
23  
24  
25  
26  
27  
28  
29  
30  
31  
32  
33  
34  
35  
36  
37  
38  
39  
40  
41  
42  
43  
44  
45  
46  
47  
48  
49  
50  
51  
52  
53  
54  
55  
56  
57  
58  
59  
60

For peer review only

1  
2  
3  
4  
5  
6  
7  
8  
9  
10  
11  
12  
13  
14  
15  
16  
17  
18  
19  
20  
21  
22  
23  
24  
25  
26  
27  
28  
29  
30  
31  
32  
33  
34  
35  
36  
37  
38  
39  
40  
41  
42  
43  
44  
45  
46  
47  
48  
49  
50  
51  
52  
53  
54  
55  
56  
57  
58  
59  
60

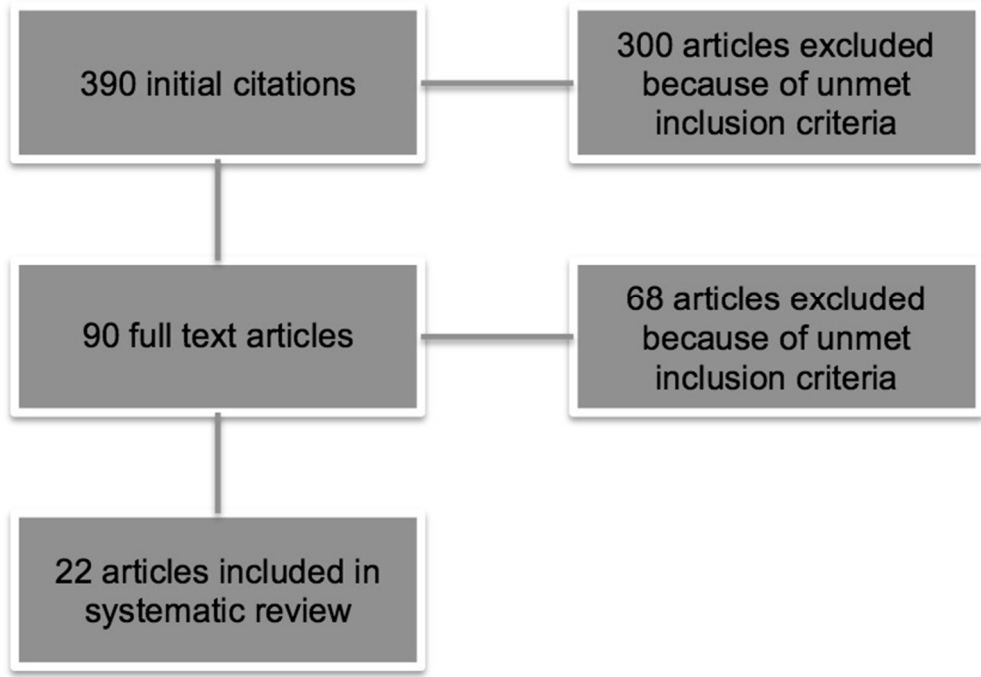

Figure 1: Flow chart of the literature search  
295x206mm (72 x 72 DPI)

view only

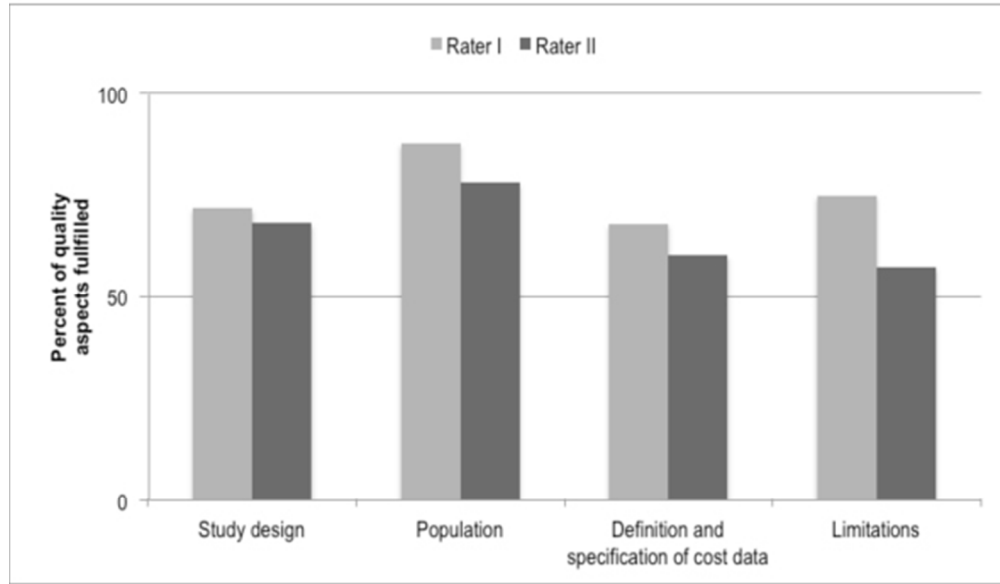

Figure 2: Quality rating of included studies  
208x169mm (72 x 72 DPI)

ew only



1  
2  
3  
4  
5  
6  
7  
8  
9  
10  
11  
12  
13  
14  
15  
16  
17  
18  
19  
20  
21  
22  
23  
24  
25  
26  
27  
28  
29  
30  
31  
32  
33  
34  
35  
36  
37  
38  
39  
40  
41  
42  
43  
44  
45  
46  
47  
48  
49  
50  
51  
52  
53  
54  
55  
56  
57  
58  
59  
60

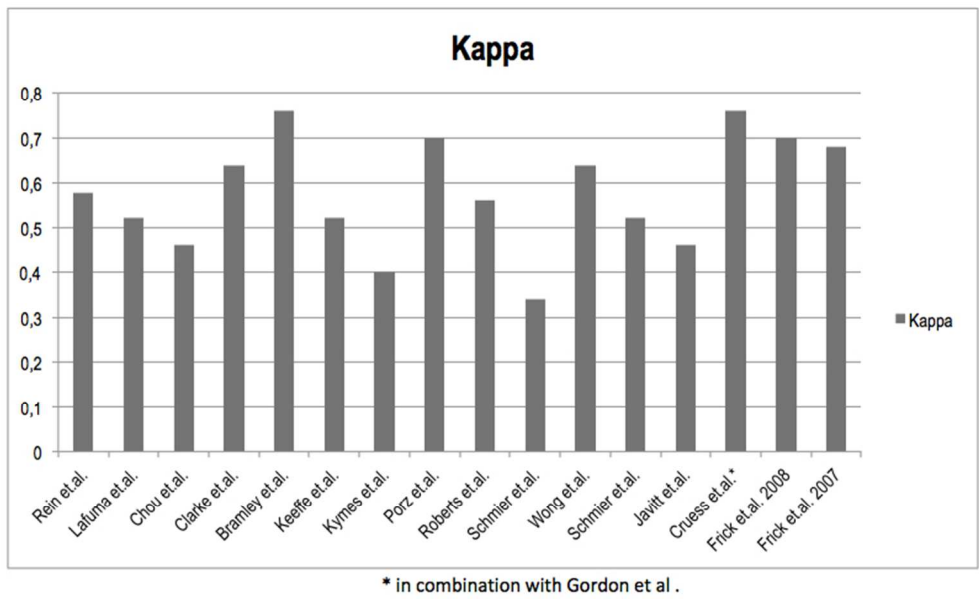

Figure 3: Kappa-index per study  
286x174mm (72 x 72 DPI)

Review only

**Study design**

1. Was the issue of research defined in a well answerable form?
2. Was the economic relevance of the research stated?
3. Was the medical context described well?
4. Were the perspectives of the study clearly described and justified?
5. Was the type of economic evaluation defined?
6. Was the valuation method stated (top-down, bottom-up, prevalence-based, incidence-based)?

**Population**

7. Was the study population described in detail?
8. Was the method of data acquisition explained (including evaluation of health states and further benefits)?
9. In case of estimations from subgroups, were the subgroups defined clearly in the beginning of the study?

**Definition and specification of cost data**

10. Were sources of data for consumption of resources exposed?
11. Was a justification stated for the selection of data sources?
12. Were all relevant (relating to the present issue of research) cost units identified?
13. Was the quantity of consumption and relevant prices mentioned separately?
14. Was the source of all relevant cost units exposed?
15. Were costs valued appropriately?
16. Were currencies and prices specified?
17. Were currency translations and price adjustments stated in detail?
18. Were price adjustments for inflation and deflation conducted adequately?
19. Is the year of currency declared?
20. Were economic productivity changes stated separately?
21. Were the changes in economic productivity changes discussed referred to the issue of research?
22. Is the data for productivity losses implicated correctly into the analysis?

**Limitations**

23. Were limitations stated and discussed?
24. Is the quality of data discussed critically?
25. Are biases described and discussed in manner and degree?

1  
2  
3  
4  
5  
6  
7  
8  
9  
10  
11  
12  
13  
14  
15  
16  
17  
18  
19  
20  
21  
22  
23  
24  
25  
26  
27  
28  
29  
30  
31  
32  
33  
34  
35  
36  
37  
38  
39  
40  
41  
42  
43  
44  
45  
46  
47  
48  
49  
50  
51  
52  
53  
54  
55  
56  
57  
58  
59  
60

|                                               |                                                                                                                                                                   | Blaney, T. et al. | Bresh, A.P. et al. | Chou, S.-L. et al. | Clarke, P. et al. | Criess, A.F. et al. | Gordon, K.D. et al. | Frick, K.D. et al. 2006 | Frick, K.D. et al. 2008 | Jiwaji, J.C. et al. | Keefe, J.E. et al. | Kynes, S.M. et al. | Laluma, A. et al. | McCarthy, C.A. et al. | Moise, A.R. et al. | Porz, G. et al. | Renn, D.B. et al. | Roberts, C.B. et al. | Schmitt, J.K. et al. (2006) | Schmitt, J.K. et al. (2009) | Vu, H.T.V. et al. | Wong, E.Y.H. et al. | Wood, J.M. et al. |
|-----------------------------------------------|-------------------------------------------------------------------------------------------------------------------------------------------------------------------|-------------------|--------------------|--------------------|-------------------|---------------------|---------------------|-------------------------|-------------------------|---------------------|--------------------|--------------------|-------------------|-----------------------|--------------------|-----------------|-------------------|----------------------|-----------------------------|-----------------------------|-------------------|---------------------|-------------------|
| <b>direct medical costs</b>                   |                                                                                                                                                                   |                   |                    |                    |                   |                     |                     |                         |                         |                     |                    |                    |                   |                       |                    |                 |                   |                      |                             |                             |                   |                     |                   |
|                                               | physician, outpatient                                                                                                                                             | x                 |                    |                    |                   | x                   | x                   | x                       | x                       | x                   | x                  |                    |                   |                       |                    |                 |                   |                      |                             | x                           |                   |                     |                   |
|                                               | hospital, inpatient                                                                                                                                               | x                 | x                  | x                  | x                 | x                   | x                   | x                       | x                       | x                   | x                  |                    |                   |                       |                    |                 | x*                |                      |                             | x                           |                   |                     |                   |
|                                               | rehabilitation                                                                                                                                                    | x                 |                    |                    |                   |                     | x                   | x                       |                         |                     |                    |                    |                   |                       |                    |                 |                   |                      |                             |                             |                   |                     |                   |
|                                               | hospice                                                                                                                                                           | x                 |                    |                    |                   |                     |                     |                         |                         |                     | x                  |                    |                   |                       |                    |                 |                   |                      |                             |                             |                   |                     |                   |
|                                               | counselling                                                                                                                                                       |                   |                    | x                  |                   |                     |                     |                         |                         |                     |                    |                    |                   |                       |                    |                 |                   |                      |                             |                             |                   |                     |                   |
|                                               | prescription drugs, vitamins and other medications                                                                                                                | x                 | x                  |                    |                   |                     | x                   | x                       | x                       | x                   | x                  |                    |                   |                       |                    |                 |                   |                      |                             | x                           |                   |                     | x                 |
|                                               | laboratory                                                                                                                                                        | x                 |                    |                    |                   |                     |                     |                         |                         |                     | x                  |                    |                   |                       |                    |                 |                   |                      |                             |                             |                   |                     |                   |
| <b>direct non-medical costs</b>               |                                                                                                                                                                   |                   |                    |                    |                   |                     |                     |                         |                         |                     |                    |                    |                   |                       |                    |                 |                   |                      |                             |                             |                   |                     |                   |
|                                               | excess of stay in institutions                                                                                                                                    |                   |                    |                    |                   |                     |                     |                         |                         |                     |                    |                    |                   |                       | x                  |                 |                   |                      |                             |                             |                   |                     |                   |
| living in institutions                        | long-term Care, nursing homes, skilled nursing facility                                                                                                           |                   |                    |                    |                   |                     |                     |                         |                         |                     |                    |                    |                   |                       |                    |                 |                   |                      |                             | x                           |                   |                     |                   |
| support in homely environment                 | paid assistance / social support services / personal care services / home delivery services / home health care / independent living services / home-visit nursing |                   |                    |                    | x                 |                     |                     |                         |                         | x                   |                    |                    | x                 |                       |                    |                 | x                 | x                    | x                           |                             |                   |                     | x                 |
| aids and devices                              | stick                                                                                                                                                             |                   |                    |                    |                   |                     |                     |                         |                         |                     |                    |                    |                   |                       | x                  |                 |                   |                      |                             |                             |                   |                     |                   |
|                                               | white stick                                                                                                                                                       |                   |                    |                    |                   |                     |                     |                         |                         |                     |                    |                    |                   |                       | x                  |                 |                   |                      |                             |                             |                   | x                   |                   |
|                                               | guide dogs / guide dog registration                                                                                                                               |                   |                    |                    | x                 |                     |                     |                         |                         |                     |                    |                    |                   |                       | x                  |                 |                   | x                    |                             |                             |                   |                     | x                 |
|                                               | walking aids                                                                                                                                                      |                   |                    |                    |                   |                     |                     |                         |                         |                     |                    |                    |                   |                       | x                  |                 |                   |                      |                             |                             |                   |                     |                   |
|                                               | wheelchair                                                                                                                                                        |                   |                    |                    |                   |                     |                     |                         |                         |                     |                    |                    |                   |                       | x                  |                 |                   |                      |                             |                             |                   |                     |                   |
|                                               | optical assistance / low vision devices                                                                                                                           |                   |                    |                    | x                 |                     | x                   | x                       |                         | x                   |                    |                    |                   |                       | x                  |                 |                   |                      |                             |                             | x                 |                     | x                 |
|                                               | television magnifier                                                                                                                                              |                   |                    |                    |                   |                     |                     |                         |                         |                     |                    |                    |                   |                       |                    |                 |                   |                      |                             |                             | x                 |                     |                   |
|                                               | low vision equipments                                                                                                                                             |                   |                    |                    |                   |                     |                     |                         |                         |                     | x                  |                    |                   |                       |                    |                 |                   |                      |                             |                             |                   |                     | x                 |
| adaptation of living environment              | furniture (toilet, kitchen, table, seat, bed, ramps, door opening device)                                                                                         |                   |                    |                    |                   |                     |                     |                         |                         |                     |                    |                    |                   |                       | x                  |                 |                   |                      |                             |                             |                   |                     |                   |
|                                               | extra lights / lamps                                                                                                                                              |                   |                    |                    |                   |                     |                     |                         |                         |                     |                    |                    |                   |                       |                    |                 |                   |                      |                             |                             |                   | x                   |                   |
|                                               | home modifications                                                                                                                                                |                   |                    |                    |                   |                     |                     |                         |                         |                     |                    |                    |                   |                       | x                  |                 |                   |                      |                             |                             |                   |                     |                   |
|                                               | move due to impairment                                                                                                                                            |                   |                    |                    |                   |                     |                     |                         |                         |                     |                    |                    |                   |                       | x                  |                 |                   |                      |                             |                             |                   |                     |                   |
| communication and media                       | computer interface                                                                                                                                                |                   |                    |                    |                   |                     |                     |                         |                         |                     |                    |                    |                   |                       | x                  |                 |                   |                      |                             |                             |                   |                     |                   |
|                                               | software adapted for blindness                                                                                                                                    |                   |                    |                    | x                 |                     |                     |                         |                         |                     |                    |                    |                   |                       | x                  |                 |                   |                      |                             |                             |                   | x                   |                   |
|                                               | computer hardware / braille printer / talking books / tape recorder                                                                                               |                   |                    |                    | x                 |                     |                     |                         |                         |                     |                    |                    |                   |                       | x                  |                 |                   |                      |                             |                             |                   | x                   |                   |
|                                               | technical assistance                                                                                                                                              |                   |                    |                    |                   |                     |                     |                         |                         |                     |                    |                    |                   |                       | x                  |                 |                   |                      |                             |                             |                   |                     |                   |
|                                               | national library service, library costs                                                                                                                           |                   |                    |                    |                   |                     | x                   | x                       |                         |                     |                    |                    |                   |                       |                    |                 |                   |                      | x                           |                             |                   |                     |                   |
| american printing house large print materials |                                                                                                                                                                   |                   |                    |                    |                   |                     |                     |                         |                         |                     |                    |                    |                   |                       |                    |                 |                   |                      | x                           |                             |                   | x                   |                   |
| transportation                                | taxi                                                                                                                                                              |                   |                    |                    | x                 |                     |                     |                         |                         |                     |                    |                    |                   |                       |                    |                 |                   |                      |                             |                             |                   |                     | x                 |
|                                               | public transport                                                                                                                                                  |                   |                    |                    | x                 |                     |                     |                         |                         |                     |                    |                    |                   |                       |                    |                 |                   |                      |                             |                             |                   |                     | x                 |
|                                               | transportation service                                                                                                                                            |                   |                    |                    |                   |                     |                     |                         |                         |                     |                    |                    |                   |                       |                    |                 |                   |                      |                             |                             |                   | x                   | x                 |
|                                               | travel reimbursement                                                                                                                                              |                   |                    |                    |                   |                     |                     |                         |                         |                     |                    |                    |                   |                       |                    |                 |                   |                      |                             | x                           |                   |                     |                   |
| national budget                               | disability benefits and pension / aid to the blind                                                                                                                |                   |                    |                    |                   |                     |                     |                         |                         |                     |                    |                    |                   |                       |                    |                 |                   |                      | x                           |                             |                   |                     |                   |
|                                               | supplemental security income                                                                                                                                      |                   |                    |                    |                   |                     |                     |                         |                         |                     |                    |                    |                   |                       |                    |                 |                   |                      |                             |                             | x                 |                     |                   |
|                                               | food stamps                                                                                                                                                       |                   |                    |                    |                   |                     |                     |                         |                         |                     |                    |                    |                   |                       |                    |                 |                   |                      |                             |                             | x                 |                     |                   |
|                                               | committee for purchase from people who are blind or severely disabled                                                                                             |                   |                    |                    |                   |                     |                     |                         |                         |                     |                    |                    |                   |                       |                    |                 |                   |                      |                             |                             | x                 |                     |                   |
|                                               | social security payments                                                                                                                                          |                   |                    |                    |                   |                     | x                   | x                       |                         |                     |                    |                    |                   |                       |                    |                 |                   |                      |                             |                             |                   |                     |                   |
|                                               | accommodation allowance                                                                                                                                           |                   |                    |                    |                   |                     |                     |                         |                         |                     |                    |                    |                   |                       |                    |                 |                   |                      |                             | x                           |                   |                     |                   |
| insurances                                    | long-term care insurance                                                                                                                                          |                   |                    |                    |                   |                     |                     |                         |                         |                     |                    |                    |                   |                       |                    |                 |                   |                      |                             |                             | x                 |                     |                   |
|                                               | social security disability insurance                                                                                                                              |                   |                    |                    |                   |                     |                     |                         |                         |                     |                    |                    |                   |                       |                    |                 |                   |                      |                             |                             | x                 |                     |                   |
| other                                         | education expenses                                                                                                                                                |                   |                    |                    | x                 |                     |                     |                         |                         |                     |                    |                    |                   |                       |                    |                 |                   |                      |                             |                             |                   |                     | x                 |
|                                               | job training service                                                                                                                                              |                   |                    |                    |                   |                     |                     |                         |                         |                     |                    |                    |                   |                       |                    |                 |                   |                      |                             |                             |                   |                     | x                 |
|                                               | recreational services                                                                                                                                             |                   |                    |                    |                   |                     |                     |                         |                         |                     |                    |                    |                   |                       |                    |                 |                   |                      |                             |                             |                   |                     | x                 |
| <b>other direct costs</b>                     |                                                                                                                                                                   |                   |                    |                    |                   |                     |                     |                         |                         |                     |                    |                    |                   |                       |                    |                 |                   |                      |                             |                             |                   |                     |                   |
|                                               | informal care                                                                                                                                                     |                   |                    |                    |                   |                     |                     |                         |                         |                     | x                  | x                  | x                 |                       |                    |                 |                   |                      |                             |                             | x                 | x                   | x                 |
| <b>indirect costs</b>                         |                                                                                                                                                                   |                   |                    |                    |                   |                     |                     |                         |                         |                     |                    |                    |                   |                       |                    |                 |                   |                      |                             |                             |                   |                     |                   |
|                                               | productivity losses                                                                                                                                               |                   |                    |                    |                   |                     | x                   | x                       |                         |                     |                    |                    |                   |                       |                    |                 |                   |                      |                             | x                           | x                 |                     |                   |
|                                               | decreased workforce participation, employment participation                                                                                                       |                   |                    |                    |                   |                     | x                   | x                       |                         |                     |                    |                    |                   |                       |                    |                 |                   |                      |                             | x                           |                   |                     |                   |
|                                               | decreased wages                                                                                                                                                   |                   |                    |                    |                   |                     |                     |                         |                         |                     |                    |                    |                   |                       |                    |                 |                   |                      |                             | x                           |                   |                     |                   |
|                                               | tax losses                                                                                                                                                        |                   |                    |                    |                   |                     | x                   | x                       |                         |                     |                    |                    |                   |                       |                    |                 |                   |                      |                             | x                           | x                 |                     |                   |
|                                               | loss of family revenue                                                                                                                                            |                   |                    |                    |                   |                     |                     |                         |                         |                     |                    |                    |                   |                       | x                  |                 |                   |                      |                             |                             |                   |                     |                   |
|                                               | loss of income                                                                                                                                                    |                   |                    |                    | x                 |                     |                     |                         |                         |                     |                    |                    |                   |                       | x                  |                 |                   |                      |                             |                             |                   |                     |                   |
|                                               | time-losses of caregivers                                                                                                                                         |                   |                    |                    |                   |                     | x                   | x                       |                         |                     |                    |                    |                   |                       | x                  |                 |                   |                      |                             |                             |                   |                     |                   |
|                                               | absenteeism/presenteeism                                                                                                                                          |                   |                    |                    |                   |                     | x                   | x                       |                         |                     |                    |                    |                   |                       |                    |                 |                   |                      |                             |                             | x                 |                     |                   |
| <b>intangible effects</b>                     |                                                                                                                                                                   |                   |                    |                    |                   |                     |                     |                         |                         |                     |                    |                    |                   |                       |                    |                 |                   |                      |                             |                             |                   |                     |                   |
|                                               |                                                                                                                                                                   |                   | x                  | x                  |                   |                     | x                   | x                       | x                       |                     |                    |                    |                   |                       | x                  | x               | x                 |                      |                             |                             |                   | x                   | x                 |

\* inpatient costs were reported in days not in cost units

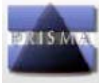

# PRISMA 2009 Checklist

| Section/topic                      | #  | Checklist item                                                                                                                                                                                                                                                                                              | Reported on page # |
|------------------------------------|----|-------------------------------------------------------------------------------------------------------------------------------------------------------------------------------------------------------------------------------------------------------------------------------------------------------------|--------------------|
| <b>TITLE</b>                       |    |                                                                                                                                                                                                                                                                                                             |                    |
| Title                              | 1  | Identify the report as a systematic review, meta-analysis, or both.                                                                                                                                                                                                                                         | 1                  |
| <b>ABSTRACT</b>                    |    |                                                                                                                                                                                                                                                                                                             |                    |
| Structured summary                 | 2  | Provide a structured summary including, as applicable: background; objectives; data sources; study eligibility criteria, participants, and interventions; study appraisal and synthesis methods; results; limitations; conclusions and implications of key findings; systematic review registration number. | 2                  |
| <b>INTRODUCTION</b>                |    |                                                                                                                                                                                                                                                                                                             |                    |
| Rationale                          | 3  | Describe the rationale for the review in the context of what is already known.                                                                                                                                                                                                                              | 3                  |
| Objectives                         | 4  | Provide an explicit statement of questions being addressed with reference to participants, interventions, comparisons, outcomes, and study design (PICOS).                                                                                                                                                  | 3                  |
| <b>METHODS</b>                     |    |                                                                                                                                                                                                                                                                                                             |                    |
| Protocol and registration          | 5  | Indicate if a review protocol exists, if and where it can be accessed (e.g., Web address), and, if available, provide registration information including registration number.                                                                                                                               | 3-4                |
| Eligibility criteria               | 6  | Specify study characteristics (e.g., PICOS, length of follow-up) and report characteristics (e.g., years considered, language, publication status) used as criteria for eligibility, giving rationale.                                                                                                      | 4                  |
| Information sources                | 7  | Describe all information sources (e.g., databases with dates of coverage, contact with study authors to identify additional studies) in the search and date last searched.                                                                                                                                  | 3-4                |
| Search                             | 8  | Present full electronic search strategy for at least one database, including any limits used, such that it could be repeated.                                                                                                                                                                               | 3                  |
| Study selection                    | 9  | State the process for selecting studies (i.e., screening, eligibility, included in systematic review, and, if applicable, included in the meta-analysis).                                                                                                                                                   | 3-4                |
| Data collection process            | 10 | Describe method of data extraction from reports (e.g., piloted forms, independently, in duplicate) and any processes for obtaining and confirming data from investigators.                                                                                                                                  | 3-4                |
| Data items                         | 11 | List and define all variables for which data were sought (e.g., PICOS, funding sources) and any assumptions and simplifications made.                                                                                                                                                                       | 3-4, 7-10          |
| Risk of bias in individual studies | 12 | Describe methods used for assessing risk of bias of individual studies (including specification of whether this was done at the study or outcome level), and how this information is to be used in any data synthesis.                                                                                      | Not done           |
| Summary measures                   | 13 | State the principal summary measures (e.g., risk ratio, difference in means).                                                                                                                                                                                                                               | 3-4                |
| Synthesis of results               | 14 | Describe the methods of handling data and combining results of studies, if done, including measures of consistency (e.g., $I^2$ ) for each meta-analysis.                                                                                                                                                   | Not done           |

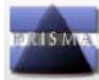

# PRISMA 2009 Checklist

| Section/topic                 | #  | Checklist item                                                                                                                                                                                           | Reported on page # |
|-------------------------------|----|----------------------------------------------------------------------------------------------------------------------------------------------------------------------------------------------------------|--------------------|
| Risk of bias across studies   | 15 | Specify any assessment of risk of bias that may affect the cumulative evidence (e.g., publication bias, selective reporting within studies).                                                             | Not done           |
| Additional analyses           | 16 | Describe methods of additional analyses (e.g., sensitivity or subgroup analyses, meta-regression), if done, indicating which were pre-specified.                                                         | Not done           |
| <b>RESULTS</b>                |    |                                                                                                                                                                                                          |                    |
| Study selection               | 17 | Give numbers of studies screened, assessed for eligibility, and included in the review, with reasons for exclusions at each stage, ideally with a flow diagram.                                          | 5-6                |
| Study characteristics         | 18 | For each study, present characteristics for which data were extracted (e.g., study size, PICOS, follow-up period) and provide the citations.                                                             | 7-10               |
| Risk of bias within studies   | 19 | Present data on risk of bias of each study and, if available, any outcome level assessment (see item 12).                                                                                                | NA                 |
| Results of individual studies | 20 | For all outcomes considered (benefits or harms), present, for each study: (a) simple summary data for each intervention group (b) effect estimates and confidence intervals, ideally with a forest plot. | NA                 |
| Synthesis of results          | 21 | Present results of each meta-analysis done, including confidence intervals and measures of consistency.                                                                                                  | NA                 |
| Risk of bias across studies   | 22 | Present results of any assessment of risk of bias across studies (see Item 15).                                                                                                                          | NA                 |
| Additional analysis           | 23 | Give results of additional analyses, if done (e.g., sensitivity or subgroup analyses, meta-regression [see Item 16]).                                                                                    | NA                 |
| <b>DISCUSSION</b>             |    |                                                                                                                                                                                                          |                    |
| Summary of evidence           | 24 | Summarize the main findings including the strength of evidence for each main outcome; consider their relevance to key groups (e.g., healthcare providers, users, and policy makers).                     | 19-22              |
| Limitations                   | 25 | Discuss limitations at study and outcome level (e.g., risk of bias), and at review-level (e.g., incomplete retrieval of identified research, reporting bias).                                            | 21-22              |
| Conclusions                   | 26 | Provide a general interpretation of the results in the context of other evidence, and implications for future research.                                                                                  | 19-22              |
| <b>FUNDING</b>                |    |                                                                                                                                                                                                          |                    |
| Funding                       | 27 | Describe sources of funding for the systematic review and other support (e.g., supply of data); role of funders for the systematic review.                                                               | 22                 |

From: Moher D, Liberati A, Tetzlaff J, Altman DG, The PRISMA Group (2009). Preferred Reporting Items for Systematic Reviews and Meta-Analyses: The PRISMA Statement. PLoS Med 6(6): e1000097. doi:10.1371/journal.pmed1000097

For more information, visit: [www.prisma-statement.org](http://www.prisma-statement.org).

1  
2  
3  
4  
5  
6  
7  
8  
9  
10  
11  
12  
13  
14  
15  
16  
17  
18  
19  
20  
21  
22  
23  
24  
25  
26  
27  
28  
29  
30  
31  
32  
33  
34  
35  
36  
37  
38  
39  
40  
41  
42  
43  
44  
45  
46  
47  
48  
49  
50  
51  
52  
53  
54  
55  
56  
57  
58  
59  
60

## THE ECONOMIC BURDEN OF SEVERE VISUAL IMPAIRMENT AND BLINDNESS - A Systematic Review

*Juliane Köberlein<sup>1\*</sup>, Karolina Beifus<sup>1\*</sup>, Corinna Schaffert<sup>1</sup>, Robert P. Finger<sup>2</sup>*

Contact Address:

Juliane Köberlein, PhD

Karolina Beifus

Department of Health Economics und Health Care Management

University of Wuppertal

Rainer-Gruenter-Str. 21

42119 Wuppertal

Tel: +49 (0)202 439 1388

Fax: +49 (0)202 439 1384

e-mail: koeberlein@wiwi.uni.wuppertal.de

<sup>1</sup>Department of Health Economics und Health Care Management

University of Wuppertal

Germany

<sup>2</sup>Department of Ophthalmology, University of Bonn, Bonn, Germany

and

Centre of Eye Research Australia, Royal Victorian Eye and Ear Hospital,

University of Melbourne, Melbourne, Australia

\*JK and KB contributed equally to this article

**Keywords:** visual impairment, blindness, costs of illness, health economics

**Word Count:** 3450

## ABSTRACT

### Objectives

Visual impairment and blindness (VI&B) cause a considerable and increasing economic burden in all high income countries due to population ageing. Thus we conducted a review of the literature to better understand all relevant costs associated with VI&B and to develop a multi-perspective overview.

### Design

Systematic review. Two independent reviewers searched relevant literature and assessed studies for inclusion and exclusion criteria as well as quality [aspects](#)

### Eligibility criteria for included studies

Interventional, non-interventional and cost of illness studies, conducted prior [to](#) May 2012, investigating [direct](#) and indirect costs as well as intangible effects related to visual impairment and blindness, were included.

### Methods

We followed the PRISMA statement approach to identify relevant studies. A meta-analysis was not performed, due to the variability of reported cost categories [and varying definition of visual impairment](#).

### Results

A total of 22 studies were included. Hospitalization and use of medical services around diagnosis and treatment at the onset of VI&B were the largest contributor to direct medical costs. Mean annual expenses [per patient](#) were found to be US\$ PPP 12,175-14,029 for moderate visual impairment, US\$ PPP 13,154-16,321 for severe visual impairment, and US\$ PPP 14,882-24,180 for blindness, almost twofold the costs for non-blind patients. Informal care was the major contributor to other direct costs, with the time spent by caregivers increasing from 5.8 hours/week (or US\$ PPP 263) for persons [with](#) vision > 20/32 up to 94.1 hours/week (or US\$ PPP 55,062) for persons with vision ≤ 20/250. VI&B caused considerable indirect costs due to productivity losses, premature mortality, and dead weight losses.

### Conclusions

VI&B cause a considerable economic burden for affected persons, their care givers and society at large, which increases with the degree of visual impairment. This review provides insight into the distribution of costs and the economic impact of VI&B.

## ARTICLE SUMMARY

### Article Focus

- To explore all relevant costs associated with visual impairment and blindness.

### Key Message

- We could demonstrate a considerable impact of visual impairment and blindness in terms of the associated direct and indirect costs, as well as intangible effects such as loss of well-being, independence and excess mortality.
- A large proportion of the direct costs reported in reviewed studies are not directly related to eye-related medical care, but to falls and other accidents due to visual impairment, exacerbation of diabetes due to a reduced ability to self-manage, depression related to loss of vision and further excess morbidity.
- All identified costs as well as intangible effects correlated with the degree of visual impairment with highest expenditures associated with blindness.

### Strengths and limitations

- This is the first ~~review exploring an~~ international and multi-perspective overview of costs and intangible effects associated with visual impairment as well as blindness.
- The study synthesis of reviewed literature was limited as no two studies used the same methodology, reported exactly the same outcomes or used the same sample population. Therefore a meta-analysis ~~was could~~ not ~~be~~ conducted.



## INTRODUCTION

Visual impairment and blindness are foremost a problem of older age in all high-income countries, and constantly increasing due to the ageing of populations ~~in these countries~~ [1]. Globally, the burden of disease related to vision disorders has increased by 47% from 12,858,000 Disability Adjusted Life Years (DALYs) in 1990 to 18,837,000 DALYs in 2010 [2]. ~~In high-income countries,~~ ~~H~~health-related quality of life in severely visually impaired persons has been shown to be similar or even lower and emotional distress higher compared with other serious chronic health conditions such as stroke or metastasised solid tumours [3]. Blindness and visual impairment impact not only the affected individual but also the family, caregivers and the community, leading to a significant cost burden. In Australia, the overall cost placed visual disorders seventh among diseases, ahead of coronary heart disease, diabetes, depression, and stroke in terms of economic burden on the health system [4]. As demands on healthcare continue to increase in all high-income countries, economic evaluations of disease, impairment and interventions have also become increasingly important [5]. This necessitates a clear understanding of all aspects of the direct and indirect costs and intangible effects related to blindness and severe visual impairment, as almost all interventions in this area are aiming to prevent these and are often measured as an incremental cost effectiveness ratio (ICER), i.e. the difference in cost compared to the difference in effectiveness. Similarly, faced with increasing demand and limited resources in healthcare, these resources need to be prioritized which again calls for a clear understanding of the economic impact of a disease or disorder. ~~-~~Against this background we conducted a systematic review of the literature, collating all data available on the economic impact of visual impairment and blindness.

## METHODS

~~The systematic review was conducted as suggested in the We followed the PRISMA statement which aims to improve the quality of systemtic reviews by providing guidance and a 27-item checklist to aid in statement approach to conduct this systematic review. This statement consists amongst others of a 27 item checklist and intends to help authors of systematic reviews to structreing their methods and improving thee reporting of results. It focuses on randomized trials, but can also be used as a basis for reporting systematic reviews of other types of research, for example health economic evaluation studies. However the checklist should not be used as a quality assessment instrument to measure the quality of a systemat-ic review~~ included studies or the performed systematic review [47]. The completed ~~For higher transparency Appendix 3 displays the PRISMA checklist which we completed alongside our review process~~for this review can be found in appendix three.

Field Code Changed

Formatted: English (U.S.)

## Literature search

All economical and medical databases were searched from May to June 2012 via PubMed and OVID using the following terms:

*“low vision”, “visual impairment”, “visually impaired”, “blindness”, “blind”, “visual loss”, “costs”, “costs of illness”.*

Subsequently, a second search was conducted using the main causes of visual impairment and blindness. Search terms were: *“low vision”, “visual impairment”, “visually impaired”, “blindness”, “blind”, “visual loss”, “costs”* combined with *“age-related macular degeneration”, “glaucoma”, “diabetic retinopathy”, “cataract”, “corneal opacities”, “childhood blindness”* separated by *“or”*.

Supplemental sources including references contained in identified articles were used in addition.

Two independent researchers screened identified articles using the following inclusion or exclusion criteria:

### Inclusion:

— data for direct and indirect costs related to visual impairment and blindness. Cost-of-illness – or in this case cost-of-impairment – studies can be divided into disease-specific and general studies. Both types of studies were included if they contained relevant data.

—

—

- studies with outcomes related to intangible effects due to visual impairment and blindness,
- overall data for burden of illness related to affected persons and carers.

### Exclusion:

- costs pertaining to underlying diseases only with no specification of visual impairment levels,
- economic studies conducted in developing countries.

As we were interested in the burden of VI&B in high-income countries only, we We have excluded economic studies conducted in developing countries. Health services provision and treatment options differ vastly between high-income and middle- or low-income countries, making a comparison of cost categories unfeasible. because generally treatment pathways show a high degree of heterogeneity and access to care is highly different. Both aspects make comparisons to developed countries more difficult.

Formatted

Formatted: List Paragraph, Bulleted + Level: 1 + Aligned at: 0.25" + Indent at: 0.5"

Formatted: Font: 11 pt

### ~~Data extraction strategy & Cost classification~~

All included articles were assessed as to which cost aspects they reported. Broadly, costs were divided into direct costs, indirect costs, and intangible effects [6].

Direct costs are defined as the actual expenses related to an illness and contain medical costs, non-medical costs and other direct costs [5]. Medical costs measure the cost of resources used for treating a particular illness. Non-medical costs are costs caused by the disease but not attributed to medical treatment. In case of visual impairment and blindness these are supporting services, assistive devices, home care, residential care or transportation (travel expenses). Other direct costs comprise informal care, time spent in treatment by patients or caregivers, or time spent in rehabilitation, training, self-help groups or preventative activities [5].

Indirect costs are defined as the value of lost output caused by reduced productivity due to illness or disability [7]. Both, patients and caregivers are affected by indirect costs due to allowances (financial support for income, residence, benefits), productivity losses (absenteeism, salary losses, part-time employment, loss of work), and dead weight losses ~~or as well as~~ years of life lost.

Dead weight loss, also known as an excess burden, is not a clearly defined concept. In a purely economic sense, deadweight loss describes the costs to society created by market inefficiency. In the context of our study we refer to it as an excess financial burden on society caused by VI&B.

Dead weight loss is defined ...

Intangible costs or effects refer to the burden of illness of affected persons and caregivers, and comprise amongst others loss of well being or loss of quality of life. It can be captured using questionnaires and expressed in DALYs. As this aspect of costs is difficult to quantify, DALYs or other measures of intangible effects are rarely-rarely assigned a monetary value. Commonly, cost categories considered in a particular study depend on the perspective the study is conducted from, i.e. a healthcare payer's (direct medical and non-medical costs only) or the patient's perspective, or a societal perspective (all costs).

As cost categories varied considerably between all ~~Furthermore cost-of-illness studies were varying within reported cost components~~ all different direct and indirect cost categories were listed in appendix two prior to being categorized into our broader categories as outlined above. For example ~~whereas one study reported all components of direct costs another cost-of-illness study described only outpatient cost and rehabilitation expenditures. To achieve a transparent reporting of costs we provide in Appendix 2 a schedule of all included studies dealing with direct and indirect costs and their reported cost categories.~~

Field Code Changed

Field Code Changed

Field Code Changed

Formatted: Line spacing: 1.5 lines

Field Code Changed

Formatted: English (U.S.)

Formatted: Tab stops: 1.94", Left

Formatted: Font: 11 pt, Bold

~~Cost of illness or in this case cost of impairment studies can be divided into disease specific and general studies. Both types of studies were included if they contained relevant data.~~

### Quality of included studies

A checklist, based on the assessment tool of Emmert and colleagues [8] and extended by several questions covering relevant cost-of-illness aspects (see **Appendix 1**), was generated to assess the overall quality of ~~all 16~~ included studies ~~dealing with reporting direct or indirect costs of illness~~. The checklist contained sections on the study design, population, definition and specification of cost data and its limitations, including a total of 25 questions. Studies were rated from 0 – 100 for each of these categories. Two independent reviewers conducted the assessment and interrater-reliability was assessed using Kappa ( $\kappa_n$ ) as suggested by Brennan and Prediger [9] for every study. The interpretation of agreement was based on the agreement scale by Landis and Koch [10]. ~~According to these authors Kappa values which indicates fair agreement at Kappa levels between 0.21 and 0.40, moderate agreement are correlated to a fair agreement, values between 0.41 and 0.60, substantial to a moderate, values between 0.61 and 0.80 and almost perfect agreement to a substantial and a score of more than 0.81 to an almost perfect agreement and above.~~

Field Code Changed

Field Code Changed

Field Code Changed

### Conversion of Cost-of-illness study results

For better comparison of costs across studies, the data were transformed: (1) costs were inflated to 2011 using country specific gross domestic product deflator, which takes fluctuating exchange rates, different purchasing power of currencies and the rate of inflation into account [11, 12], and (2) converted to USD using purchasing power parities (PPP) [13]. Purchasing power parities account for differences in price levels between countries, and convert local currencies into international dollars taking purchasing power of different national currencies into account and eliminating differences in price levels between countries. The transformed values are presented in million units (million US\$-PPP) for total expenditures reported and in US\$-PPP for costs per person.

Field Code Changed

Field Code Changed

Field Code Changed

## RESULTS

The search yielded a total of ~~389-390400~~ articles. After applying all inclusion and exclusion criteria, 22 studies were included in the systematic review (**Figure 1**). Altogether there were ~~nine~~ eight studies conducted in the USA, six studies conducted in Australia, two studies from France ~~and~~ Canada, and one study from each of the following countries: Germany, ~~Canada~~,

1  
2  
3  
4  
5  
6  
7  
8  
9  
10  
11  
12  
13  
14  
15  
16  
17  
18  
19  
20  
21  
22  
23  
24  
25  
26  
27  
28  
29  
30  
31  
32  
33  
34  
35  
36  
37  
38  
39  
40  
41  
42  
43  
44  
45  
46  
47  
48  
49  
50  
51  
52  
53  
54  
55  
56  
57  
58  
59  
60

the UK,<sup>7</sup> Japan,<sup>8</sup> India and one study with a global perspective.<sup>9</sup> All included studies are summarized in **Table 1**.

For peer review only

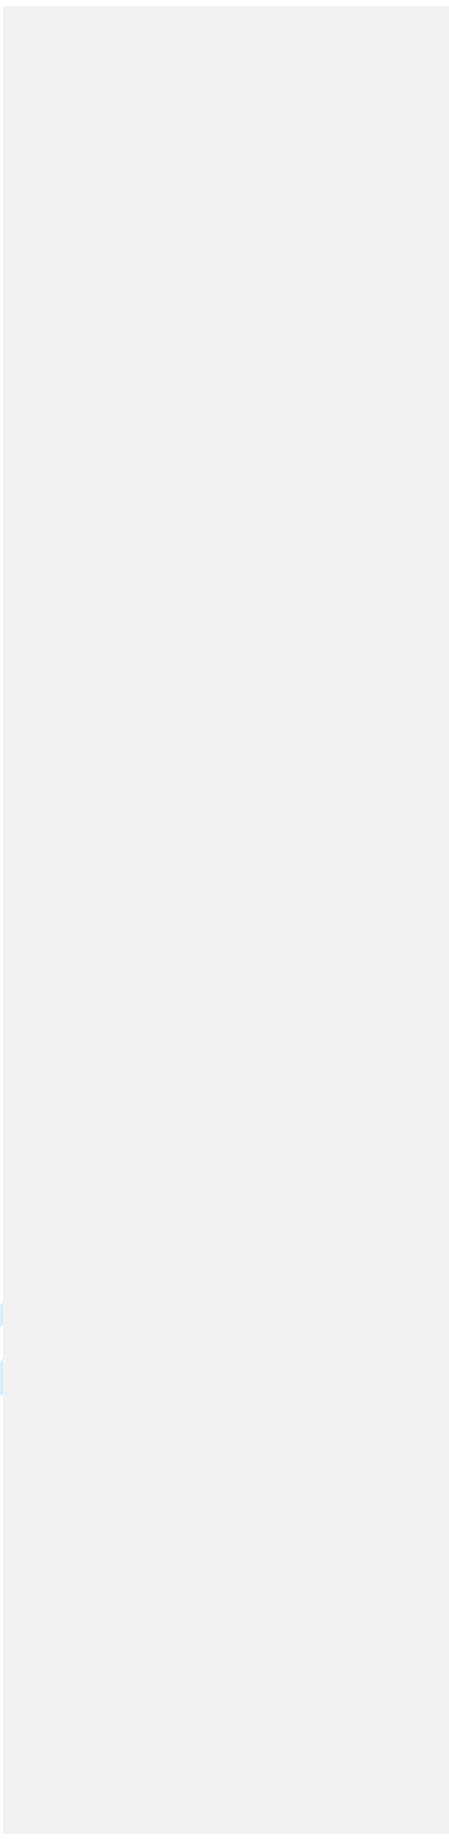

Table 1: Characteristics of included studies

| Author                                                                | Country   | Design and Population                                                                                                                                                                                                                                                                                                                                                                                                      | Cost components evaluated                                                          | Objective                                                                                                                                       | Vision categories                                                                         |
|-----------------------------------------------------------------------|-----------|----------------------------------------------------------------------------------------------------------------------------------------------------------------------------------------------------------------------------------------------------------------------------------------------------------------------------------------------------------------------------------------------------------------------------|------------------------------------------------------------------------------------|-------------------------------------------------------------------------------------------------------------------------------------------------|-------------------------------------------------------------------------------------------|
| Bramley et al. 2008 [14]                                              | USA       | retrospective cohort analysis of nationally representative Medicare 5% random sample; patients older than 65 years with newly diagnosed glaucoma; regression analysis                                                                                                                                                                                                                                                      | direct medical costs, intangible effects                                           | to measure costs of visual impairment due to progressing glaucoma                                                                               | no vision loss, moderate vision loss, severe vision loss, blindness                       |
| Brezin et al. 2005 [15]                                               | France    | national survey of a random stratified sample; 16, 945 affected persons answered questionnaires; 4,091 caregiver answered questionnaires;                                                                                                                                                                                                                                                                                  | indirect costs; intangible effects                                                 | to document the prevalence of self-reported visual impairment and its association with disabilities, handicaps, and socioeconomic consequences. | blind or light perception only, low vision, other visual problems, and no visual problems |
| Chou et al. 2006 [16]                                                 | Australia | 150 persons completed cost diaries for 12 months and were evaluated; costs categorized into four sections: 1. medicines, products and equipment, 2. health and community services, 3. informal care and support, 4. other expenses                                                                                                                                                                                         | direct medical costs, direct non-medical costs                                     | to describe and evaluate the process used to collect personal costs (out-of pocket) associated with vision impairment using diaries             | ≥ 6/12with restricted fields; <6/12-6/18; <6/18-6/60; <6/60-3/60; <3/60                   |
| Clarke et al. 2003 [17]                                               | UK        | regression-based approach to estimate the short-term and long-term annual hospital and non-hospital costs associated with seven major diabetes-related complications in the UK Prospective Diabetes Study (UKPDS): myocardial infarction (MI); stroke, angina or ischemic heart disease (IHD); heart failure; blindness in one eye; amputation and cataract extraction; 5102 patients with newly diagnosed type 2 diabetes | direct medical costs                                                               | to estimate the immediate and long-term healthcare costs associated with seven diabetes-related complications                                   | blind in one eye                                                                          |
| Cruess et al. 2011 [18] (in combination with Gordon et al. 2011 [19]) | Canada    | prevalence-based approach, population projections for the whole population were compiled using data from the Statistics Canada 2006 Population Projections for Canada, Provinces and Territories 2001-2031                                                                                                                                                                                                                 | direct medical costs, direct non medical costs, indirect costs, intangible effects | to investigate costs of vision loss in Canada to inform healthcare planning                                                                     | no details                                                                                |
| Frick et al. 2008 [20]                                                | USA       | retrospective cohort study; patients with blindness matched to non-blind selected from managed care claims database                                                                                                                                                                                                                                                                                                        | direct medical costs                                                               | to evaluate total and condition related charges incurred by blind patients in a managed care population in the US                               | blind, non blind                                                                          |

Field Code Changed

Field Code Changed

|                          |           |                                                                                                                                                                                                                                          |                                                                                                        |                                                                                                                                                                                     |                                                                                                |
|--------------------------|-----------|------------------------------------------------------------------------------------------------------------------------------------------------------------------------------------------------------------------------------------------|--------------------------------------------------------------------------------------------------------|-------------------------------------------------------------------------------------------------------------------------------------------------------------------------------------|------------------------------------------------------------------------------------------------|
| Frick et al. 2007 [21]   | USA       | <a href="#">data from the medical expenditure panel survey 1996 – 2002 for adults older than 40 years with visual impairment or blindness</a>                                                                                            | <a href="#">direct medical costs; direct non medical costs; other direct costs; intangible effects</a> | <a href="#">to estimate the economic impact of visual impairment and blindness in persons aged 40 years and older in the US</a>                                                     | <a href="#">visual impairment, blindness</a>                                                   |
| Javitt et al. 2007 [22]  | USA       | retrospective cohort analysis of nationally representative Medicare 5% random sample, excluding Medicare managed-care enrollees                                                                                                          | direct medical costs                                                                                   | to assess and identify the costs to the Medicare program for patients with either stable or progressive vision loss and estimate the impact on eye-related and non-eye related care | mild, moderate, severe vision loss (VA $\leq$ 20/200), blindness (VA $\leq$ 20/400)            |
| Keeffe et al. 2009 [23]  | Australia | 114 participants of the Melbourne Visual Impairment Project completed diaries for 12 month; the burden of caregiver and opportunity costs for losses in work time was calculated (in combination with methods and data from Chou et.al.) | other direct costs                                                                                     | to analyse prospective data on providers, types and costs of care for people with impaired vision in Australia                                                                      | VA < 20/40                                                                                     |
| Kymes et al. 2010 [24]   | USA       | decision analytic approach; Markov model to replicate health events over the remaining lifetime of someone newly diagnosed with glaucoma                                                                                                 | incremental costs of illness                                                                           | to evaluate the incremental cost of primary open-angle glaucoma considering both visual and non-visual medical costs over a lifetime                                                | no details                                                                                     |
| Lafuma et al. 2006 [25]  | France    | interviews with sample population (665,000) from a national survey of persons living in institutions or in the community (with caregiver at home)                                                                                        | direct non medical costs, other direct costs, indirect costs                                           | to estimate the annual national non medical costs due to visual impairment and blindness                                                                                            | blind (light perception), low vision (better than light perception??, low vision, and controls |
| McCarty et al. 2001 [26] | Australia | population-based study; evaluation of the data from Melbourne Visual impairment project; population $\geq$ 40 years was analyzed in causes of death                                                                                      | intangible effects                                                                                     | to describe predictors of mortality in the 5 year follow up of Melbourne Visual impairment project;                                                                                 | visual acuity < 6/12                                                                           |
| Morse et al. 1999 [27]   | USA       | 2.552.350 discharges from hospital in state of NY -> 5.764 patients had visual impairment                                                                                                                                                | direct medical costs                                                                                   | to assess whether visual impairment contributes to average length of stay within inpatient care facilities                                                                          | no details                                                                                     |
| Porz et al. 2010 [28]    | Germany   | retrospective study of 66 patients using a cost and a vision-related quality of life questionnaire (Impact of vision Impairment                                                                                                          | direct non medical costs, intangible ef-                                                               | to capture costs for medicines, aids and equipment, support in everyday life and social bene-                                                                                       | Visual acuity (VA) $\geq$ 0,3, Visual acuity < 0,3                                             |

|                          |           | questionnaire)                                                                                                                                                                                                                            | facts                                                                                                                            | fits, as well as vision- related quality of life                                                                                                                                                                                                                                                                                                                                                                                   |                                                                                                                                          |
|--------------------------|-----------|-------------------------------------------------------------------------------------------------------------------------------------------------------------------------------------------------------------------------------------------|----------------------------------------------------------------------------------------------------------------------------------|------------------------------------------------------------------------------------------------------------------------------------------------------------------------------------------------------------------------------------------------------------------------------------------------------------------------------------------------------------------------------------------------------------------------------------|------------------------------------------------------------------------------------------------------------------------------------------|
| Rein, et al. 2006 [29]   | USA       | private insurance and Medicare claims data                                                                                                                                                                                                | direct non medical costs, indirect costs                                                                                         | to estimate the societal economic burden and the governmental budgetary impact of the following visual disorders among US adults aged 40 years and older: <a href="#">visual impairment</a> , <a href="#">blindness</a> , <a href="#">refractive error</a> , <a href="#">age-related macular degeneration</a> , <a href="#">cataracts</a> , <a href="#">diabetic retinopathy</a> , and <a href="#">primary open angle glaucoma</a> | refractive errors                                                                                                                        |
| Roberts et al. 2010 [30] | Japan     | prevalence-based approach; adopted using data on visual impairment, the national health system, and indirect costs                                                                                                                        | direct medical costs, direct non medical costs, <del>indirect costs</del> , <del>other direct costs</del> and intangible effects | to quantify the total economic cost of visual impairment in Japan                                                                                                                                                                                                                                                                                                                                                                  | low vision 6/12-6/60;<br>blind < 6/60;<br>visual impairment = >6/12                                                                      |
| Schmier et al. 2009 [31] | USA       | using a questionnaire that included items on demographic and clinical characteristics and on the use of services, assistive devices, and caregiving; 761 persons were included                                                            | direct non medical costs, other direct costs                                                                                     | to assess the use of devices and caregiving among individuals with diabetic retinopathy and to evaluate the impact of visual acuity on use                                                                                                                                                                                                                                                                                         | group 1 (20/20 or better),<br>group 2 (20/ 25–20/30),<br>group 3 (20/40–20/50),<br>group 4 (20/60–20/70), or<br>group 5 (20/80 or worse) |
| Schmier et al. 2006 [32] | USA       | survey with interviews on Daily Living Tasks Dependent on Vision Questionnaire;803 respondents                                                                                                                                            | other direct costs,                                                                                                              | to assess the patient-reported use of caregiving among individuals with age-related macular degeneration (AMD) and evaluation of impact of visual impairment level on this use                                                                                                                                                                                                                                                     | 1. VA > 20/32;<br>2. VA 20/32 - > 20/50;<br>3. VA 20/50 - >20/80;<br>4. VA 20/80 - > 20/150;<br>5. 20/150 - >20/250;<br>6. VA ≤ 20/250   |
| Vu, et al. 2005 [33]     | Australia | stratified random sample of 3040 participants from the Melbourne Visual Impairment Project; 2530 attended the follow-up study                                                                                                             | intangible effects                                                                                                               | to investigate whether unilateral vision loss reduces any aspects of quality of life in comparison with normal vision                                                                                                                                                                                                                                                                                                              | unilateral and bilateral vision loss (correctable and non-correctable)                                                                   |
| Wong et al. 2008 [34]    | Australia | prospective cohort study; participants of any age to complete a diary for 12 months answering four categories: 1) medicines, products and equipment, 2) health and community services, 3) informal care and support and 4) other expenses | direct costs (medical and non medical), other direct costs                                                                       | to determine the personal out-of-pocket costs of visual impairment and to ex-amine the expenditure pattern related to eye diseases and the severity of visual impairment                                                                                                                                                                                                                                                           | visual acuity ≥6/18 with constricted. fields;<br>< 6/18-6/60;<br>< 6/60                                                                  |



1  
2  
3  
4  
5  
6  
7  
8  
9  
10  
11  
12  
13  
14  
15  
16  
17  
18  
19  
20  
21  
22  
23  
24  
25  
26  
27  
28  
29  
30  
31  
32  
33  
34  
35  
36  
37  
38  
39  
40  
41  
42  
43  
44  
45  
46  
47  
48  
49

|                          |           |                                                                                                    |                                             |                                                                                                                                    |                                                                         |
|--------------------------|-----------|----------------------------------------------------------------------------------------------------|---------------------------------------------|------------------------------------------------------------------------------------------------------------------------------------|-------------------------------------------------------------------------|
| Wood et al. 2011<br>[35] | Australia | 76 community-dwelling individuals with a range of severity of AMD; completing a diary for 12 month | intangible effects; costs of adverse events | to explore the relationship between AMD, fall risk, and other injuries and identified visual risk factors for these adverse events | binocular visual acuity, contrast sensitivity, and merged visual fields |
|--------------------------|-----------|----------------------------------------------------------------------------------------------------|---------------------------------------------|------------------------------------------------------------------------------------------------------------------------------------|-------------------------------------------------------------------------|

For peer review only

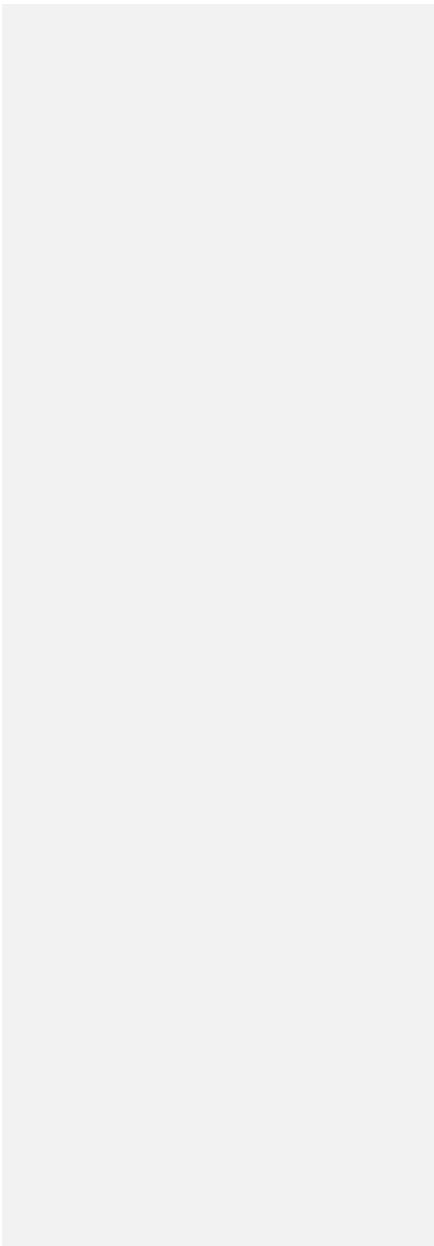

1  
2  
3  
4  
5  
6  
7 All ~~176~~ of ~~22~~ studies dealing with direct or indirect costs of illness were rated above 50 for all  
8 four main quality aspects, indicating a sufficient level of quality, and consequently were in-  
9 cluded into the review (see **Figure 2**). The interrater-reliability was consistently high and only  
10 a few discrepancies had to be settled by a discussion between the two raters. Kappa scores  
11 ranged from 0.34 to 0.76 (**Figure 3**).

12  
13  
14 Of all included studies ~~eleven-twelve~~ captured direct medical cost, ~~tenseven~~ direct non-  
15 medical costs, and six other direct costs. ~~Seven-Six~~ studies report data on indirect costs and  
16 ten on intangible effects. All cost components reported by studies within each cost category  
17 are summarized in **Appendix 2**, highlighting the considerable variability in obtaining and re-  
18 porting cost aspects related to visual impairment and blindness between all studies.

#### 21 Direct medical costs

22  
23 Direct medical costs occurred mostly due to hospitalization, the use of medical services and  
24 medical products, and were reported either as incremental costs or, in some studies, provid-  
25 ed as the length of hospital stay (**Table 2**).

26  
27 At the onset of visual impairment and blindness, the two major contributors to direct medical  
28 costs are hospitalizations and costs due to increased use of medical services around diag-  
29 nosis and treatment [17,18,20,21,27,30]. Costs related to recurrent hospitalizations and on-  
30 going, but less frequent use of medical services, remain major cost components in persons  
31 with visual impairment and blindness in the long term. Costs related to drugs, however, did  
32 not emerge as a major direct cost factor [16,34]. All identified costs correlated with the de-  
33 gree of visual impairment leading to the highest expenditures being associated with blind-  
34 ness. The considerable differences in study methods and reported outcomes makes a head  
35 to head comparison of results by study or country or aggregation of data in terms of meta-  
36 analyses for direct medical costs very difficult. Several studies based on representative sam-  
37 ples of Medicare beneficiaries in the USA reported mean annual expenses per patient to be  
38 US\$ PPP 12,175-14,029 for moderate visual impairment, US\$ PPP 13,154-16,321 for severe  
39 visual impairment, and US\$ PPP 14,882-24,180 for blindness, which is almost a 100% ex-  
40 cess of the estimated mean annual cost for non-blind patients at the upper end of the range  
41 (**Table 2**).

Field Code Changed

Table 2: [Outcomes-Results](#) for direct medical costs.

| Study                             | cost outcomes                                                                                                                                        | US\$ PPP in 2011 |
|-----------------------------------|------------------------------------------------------------------------------------------------------------------------------------------------------|------------------|
| Bramley et al. 2008 <sup>14</sup> | annual costs per patient compared in degrees of vision impairment from no vision loss and onset of moderate or severe vision impairment or blindness |                  |
|                                   | no vision loss <b>US\$ 8,157</b>                                                                                                                     | 8,695            |
|                                   | moderate visual impairment <b>US\$ 13,162</b>                                                                                                        | 14,029           |
|                                   | severe visual impairment <b>US\$ 15,312</b>                                                                                                          | 16,321           |
|                                   | blindness <b>US\$ 18,670</b>                                                                                                                         | 19,900           |
| Frick et al. 2007 <sup>21</sup>   | total expenditures on health care in blind and visual impaired persons ≥ 40 years                                                                    |                  |
|                                   | blindness <b>individual</b> excess medical expenditures <b>US\$ 2,157</b>                                                                            | 2,621            |
|                                   | <b>total</b> excess medical expenditures <b>US\$ 2,454 million</b>                                                                                   | 2,982 million    |
|                                   | visual impairment <b>individual</b> excess medical exp. <b>US\$ 1,037</b>                                                                            | 1,260            |
|                                   | <b>total</b> excess medical expenditure <b>US\$ 2,661 million</b>                                                                                    | 3,233 million    |
| Frick et al. 2008 <sup>20</sup>   | total annual monetary impact for VI and blindness (primary owing to home care) <b>US\$ 5,100 million</b>                                             | 6,197 million    |
|                                   | cohort with legally blind patients matched to equal sample cohort with non-blind patients (annual costs per patient in the first year)               |                  |
|                                   | blind persons mean costs <b>US\$ 20,677</b>                                                                                                          | 24,180           |
|                                   | median costs <b>US\$ 6,854</b>                                                                                                                       | 8,015            |
|                                   | non blind mean costs <b>US\$ 13,321</b>                                                                                                              | 15,578           |
| Javitt et al. 2007 <sup>22</sup>  | median costs <b>US\$ 371</b>                                                                                                                         | 434              |
|                                   | patients with normal vision compared to moderate or severe visual impairment or blindness regarding eye-related and non-eye-related care             |                  |
|                                   | mean annual costs for eye-related care                                                                                                               |                  |
|                                   | normal vision <b>US\$ 370</b>                                                                                                                        | 445              |
|                                   | moderate visual impairment <b>US\$ 345</b>                                                                                                           | 415              |
| Kymes et al. 2010 <sup>24</sup>   | severe visual impairment <b>US\$ 407</b>                                                                                                             | 490              |
|                                   | blindness <b>US\$ 237</b>                                                                                                                            | 285              |
|                                   | mean annual values for non eye related costs                                                                                                         |                  |
|                                   | normal vision <b>US\$ 7,928</b>                                                                                                                      | 9,537            |
|                                   | moderate visual impairment <b>US\$ 2,193</b>                                                                                                         | 2,638            |
| Morse et al. 1999 <sup>27</sup>   | severe visual impairment <b>US\$ 3,301</b>                                                                                                           | 3,971            |
|                                   | blindness <b>US\$ 4,443</b>                                                                                                                          | 5,345            |
|                                   | lifetime costs of POAG (primary open-angle glaucoma) to non POAG patients                                                                            |                  |
|                                   | incidence costs <b>US\$ 41,039</b>                                                                                                                   | 46,456           |
|                                   | prevalence costs <b>US\$ 19,268</b>                                                                                                                  | 21,811           |
| Cruess et al. 2011 <sup>18</sup>  | drug costs <b>US\$ 7,098</b>                                                                                                                         | 8,035            |
|                                   | incremental incidence costs <b>US\$ 27,326</b>                                                                                                       | 30,933           |
|                                   | incremental prevalence costs <b>US\$ 5,555</b>                                                                                                       | 6,288            |
|                                   | incremental drug costs <b>US\$ 4,179</b>                                                                                                             | 4,731            |
|                                   | extension of average length of stay in hospitals due to visual impairment <b>5.2 days</b> longer stay                                                |                  |
| Chou et al. 2006 <sup>16</sup>    | financial burden of vision loss to Canadian health care system                                                                                       |                  |
|                                   | hospital <b>CAN\$ 1,497.7 million</b>                                                                                                                | 1,934.72 million |
|                                   | physicians <b>CAN\$ 866.5 million</b>                                                                                                                | 1,119.34 million |
| Wong et al. 2008 <sup>34</sup>    | vision care <b>CAN\$ 3,483.7 million</b>                                                                                                             | 4,500.24 million |
|                                   | the out-of-pocket expenses for medicines and products per person annually                                                                            |                  |
|                                   | <b>AUS \$ 206</b>                                                                                                                                    | 456              |
| Clarke et al. 2003 <sup>17</sup>  | annual costs for medicine and products per patient                                                                                                   |                  |
|                                   | Visual acuity (VA) ≥ 6/18 with restr. field <b>AUS\$ 285</b>                                                                                         | 632              |
|                                   | < 6/18 – 6/60 = <b>AUS\$ 233</b>                                                                                                                     | 516              |
| Roberts et al. 2010 <sup>30</sup> | < 6/60 = <b>AUS\$ 147</b>                                                                                                                            | 326              |
|                                   | short-term and long-term annual hospital and non-hospital costs due to major diabetes-related complications                                          |                  |
|                                   | blindness in one eye (in 20% of patients) <b>£ 4,370</b>                                                                                             | 4,086            |
| Roberts et al. 2010 <sup>30</sup> | mean hospital in-patient costs <b>£ 872</b>                                                                                                          | 815              |
|                                   | total economic costs of visual impairment                                                                                                            |                  |
|                                   | General medical expenditure <b>US\$ 8.102 billion</b>                                                                                                | 8,636 million    |
|                                   | Inpatient <b>US\$ 1.808 billion</b>                                                                                                                  | 1,927 million    |
| Roberts et al. 2010 <sup>30</sup> | Outpatient <b>US\$ 6.294 billion</b>                                                                                                                 | 6,709 million    |
|                                   | Drugs <b>US\$ 1.395 billion</b>                                                                                                                      | 1,487 million    |

Formatted: Font: 11 pt

1  
2  
3  
4  
5  
6  
7 Direct non medical costs

8 Assistive devices and aids, home modifications, costs for health care services like home-  
9 based nursing or nursing home placements were the major contributors to direct non-medical  
10 costs (**Table 3**). With worsening visual acuity direct non-medical costs for support services  
11 and assistive devices increased, from US\$ PPP 53.90 for a person with visual acuity  $\geq 20/20$   
12 up to US\$ PPP 608.71 for a person with visual acuity  $\leq 20/80$  [31]. Nursing home-  
13 placements and professional care costs incurred the highest expenditures followed by do-  
14 mestic modifications. These costs however, were highest initially shortly after the loss of vi-  
15 sion and in the majority only ~~a one off~~ incurred once (**Table 3**).  
16  
17  
18  
19  
20  
21  
22  
23  
24  
25  
26  
27  
28  
29  
30  
31  
32  
33  
34  
35  
36  
37  
38  
39  
40  
41  
42  
43  
44  
45  
46  
47  
48  
49  
50  
51  
52  
53  
54  
55  
56  
57  
58  
59  
60

Field Code Changed

Table 3: [Outcomes-Results](#) for direct non medical costs.

| Study                             | cost outcomes                                                                                                                                                                                               | US\$ PPP in 2011                                      |                           |                         |
|-----------------------------------|-------------------------------------------------------------------------------------------------------------------------------------------------------------------------------------------------------------|-------------------------------------------------------|---------------------------|-------------------------|
| Frick et al. 2007 <sup>21</sup>   | total health care expenditures for adults ≥ 40 years (excess costs)                                                                                                                                         |                                                       |                           |                         |
|                                   | blindness home health agencies <b>US\$ 4,988</b>                                                                                                                                                            | 6060                                                  |                           |                         |
|                                   | low vision home health agencies <b>US\$ 3,105</b><br>expenditures for private home health providers was <b>US\$ 1,200 more</b> for blind than visually impaired persons                                     | 3,773                                                 |                           |                         |
| Rein et al. 2006 <sup>29</sup>    | total annual costs for visual impairment and blindness for adults ≥40 years                                                                                                                                 |                                                       |                           |                         |
|                                   | nursing placements of <b>US\$ 10.96 billion</b>                                                                                                                                                             | 12,818 million                                        |                           |                         |
|                                   | guide dogs <b>US\$ 0.062 billion</b><br>independent living <b>US\$ 0.029 billion</b>                                                                                                                        | 72.5 million<br>33.9 million                          |                           |                         |
| Schmier et al. 2009 <sup>31</sup> | annual costs for use of services and devices related to the degree of visual impairment per person                                                                                                          |                                                       |                           |                         |
|                                   | devices (glasses, sticks, computer software, etc. <b>US\$ 109.79</b> )                                                                                                                                      | 120                                                   |                           |                         |
|                                   | rehabilitation <b>US\$ 7.09</b>                                                                                                                                                                             | 7.78                                                  |                           |                         |
| Chou et al. 2006 <sup>16</sup>    | annual costs for health and community services per person                                                                                                                                                   |                                                       |                           |                         |
|                                   | health care, home help, personal affairs, personal care, communication, transport, social activities <b>AUS \$ 872</b>                                                                                      | 1,932.50                                              |                           |                         |
|                                   | expenditure for taxi, public transport, education expenses, guide dog <b>AUS \$ 321</b>                                                                                                                     | 711                                                   |                           |                         |
| Cruess et al. 2011 <sup>18</sup>  | financial burden of vision loss to Canadian health care system                                                                                                                                              |                                                       |                           |                         |
|                                   | care costs <b>CAN\$ 693 million</b>                                                                                                                                                                         | 895.21 million                                        |                           |                         |
|                                   | aids and modification <b>CAN\$ 305 million</b>                                                                                                                                                              | 394 million                                           |                           |                         |
| Wong et al. 2008 <sup>34</sup>    | annual personal costs for health and community services and other expenses per patient                                                                                                                      |                                                       |                           |                         |
|                                   | median total costs <b>AUS\$ 1,768</b>                                                                                                                                                                       | 3,919                                                 |                           |                         |
|                                   | mean total costs <b>AUS \$ 3,376</b>                                                                                                                                                                        | 7,482                                                 |                           |                         |
| Roberts et al. 2010 <sup>30</sup> | total economic costs of visual impairment                                                                                                                                                                   |                                                       |                           |                         |
|                                   | meal service on admission <b>US\$ 0.149 billion</b>                                                                                                                                                         | 158.81 million                                        |                           |                         |
|                                   | home-visit nursing <b>US\$ 0.013 billions</b>                                                                                                                                                               | 13.86 million                                         |                           |                         |
|                                   | health care administration <b>US\$ 0.475 billion</b>                                                                                                                                                        | 506.30 million                                        |                           |                         |
|                                   | Community care <b>US\$ 6.608 billion</b>                                                                                                                                                                    | 7,043 million                                         |                           |                         |
|                                   | Institutional care <b>US\$ 0.238 billion</b><br>Vision aids <b>US\$ 0.2 billion</b>                                                                                                                         | 253.68 million<br>213.18 million                      |                           |                         |
| Porz et al. 2010 <sup>28</sup>    | financial and psychological burden of retinal diseases divided into health economic relevant categories; annual expenses per person                                                                         |                                                       |                           |                         |
|                                   | aids for VA ≥ 0.3 = <b>€ 96.65</b><br>VA < 0.3 = <b>€ 83.58</b>                                                                                                                                             | 77.39<br>66.92                                        |                           |                         |
|                                   | personal assistance VA ≥ 0.3 = <b>€ 454.96</b><br>VA < 0.3 = <b>€ 667.77</b>                                                                                                                                | 364.28<br>534.68                                      |                           |                         |
|                                   |                                                                                                                                                                                                             |                                                       |                           |                         |
| Lafuma et al. 2006 <sup>25</sup>  | national survey with estimation on costs of low vision and blindness for persons living in institutions <sup>1</sup> or in the community <sup>2</sup> (declared annually per person and total expenditures) |                                                       |                           |                         |
|                                   | <b>low vision</b>                                                                                                                                                                                           | <b>blindness</b>                                      | <b>low vision</b>         | <b>blindness</b>        |
|                                   | home modifications <sup>1</sup> <b>€ 36.65 pp/ year</b><br><b>€ 3.27 million total</b>                                                                                                                      | <b>€ 926.96 pp/ y</b><br><b>€ 9.63 million total</b>  | 37.87<br>3.375 million    | 957.90<br>9.95 million  |
|                                   | devices <sup>1</sup> <b>€184.14 pp/ year</b><br><b>€ 16.43 million total</b>                                                                                                                                | <b>€ 387.35 pp/ y</b><br><b>€4.03 million total</b>   | 190.29<br>16.98 million   | 400.28<br>4.165 million |
|                                   | home modification <sup>2</sup> <b>€ 42.23 pp/ y</b><br><b>€ 16.43 million total</b>                                                                                                                         | <b>€ 121.12 pp/y</b><br><b>€ 7.02 million total</b>   | 43.64<br>16.98 million    | 125.16<br>7.25 million  |
|                                   | devices <sup>2</sup> <b>€ 376.39</b><br><b>€ 420 million total</b>                                                                                                                                          | <b>€ 363.14 pp/ y</b><br><b>€ 21.04 million total</b> | 388.95<br>434.02 million  | 375.26<br>21.74 million |
|                                   | paid assistance <sup>2</sup> <b>€ 1,463.59 pp/ y</b><br><b>€ 1,635 million</b>                                                                                                                              | <b>€ 6750.66 pp/ y</b><br><b>€ 391 million total</b>  | 1,512.44<br>1,690 million | 6,976<br>404 million    |
|                                   |                                                                                                                                                                                                             |                                                       |                           |                         |
|                                   |                                                                                                                                                                                                             |                                                       |                           |                         |
|                                   |                                                                                                                                                                                                             |                                                       |                           |                         |
|                                   |                                                                                                                                                                                                             |                                                       |                           |                         |
|                                   |                                                                                                                                                                                                             |                                                       |                           |                         |

Other direct costs

Six of the included studies reported costs caused by informal care. Time spent on caring for or assisting visually impaired persons was related to the degree of visual impairment, with blind persons requiring the most assistance. The time spent by caregivers ranged from 5.8 hours per week for a person with a visual acuity of > 20/32 and a cost of US\$ PPP 263 up to 94.1 hours per week and costs of US\$ PPP 55,062 for persons with a visual acuity of ≤ 20/250 [32]. All studies differed slightly as to the nature of direct costs assessed. Some studies reported on governmental, out-of-pocket expenses as well as opportunity costs, others considered only one or two of these. The wide range of time and resources spent on informal care provision demonstrates the broad economic impact and considerable burden of informal care provision with concurrent expenses at a personal and societal level. Again, reported cost aspects and methodologies differ considerably, with, for example, Keeffe and colleagues[23] reporting out-of-pocket expenses and Lafuma and colleagues[25] reporting time spent on caring using an hourly rate. The multitude of differing approaches in each study does not allow for a head-to-head comparison but gives a comprehensive impression of the complex cost situation and highlights the importance of providing assistance to visually impaired and blind persons (Table 4).

Field Code Changed

Field Code Changed

Field Code Changed

Table 4: Outcomes-Results for other direct costs.

| Study                             | cost outcomes                                                                                                                                                                       | US\$ PPP in 2011    |                   |                  |
|-----------------------------------|-------------------------------------------------------------------------------------------------------------------------------------------------------------------------------------|---------------------|-------------------|------------------|
| Frick et al. 2007 <sup>21</sup>   | the economic impact of blindness and visual impairment on adults ≥ 40 years                                                                                                         |                     |                   |                  |
|                                   | blindness causes mean individual excess informal care days 5.2                                                                                                                      |                     |                   |                  |
|                                   | visual impairment causes mean individual excess informal care days 1.2                                                                                                              |                     |                   |                  |
|                                   | blindness causes total excess informal care costs <b>US\$ 242 million</b>                                                                                                           | 294.03 million      |                   |                  |
|                                   | visual impairment total excess informal care costs <b>US\$ 124 million</b>                                                                                                          | 150.66 million      |                   |                  |
| Schmier et al. 2009 <sup>31</sup> | annual costs for caregiver time spent in supporting patients with macular degeneration                                                                                              |                     |                   |                  |
|                                   | <b>US\$ 5,038</b>                                                                                                                                                                   | 5,526               |                   |                  |
| Schmier et al. 2006 <sup>32</sup> | annual costs for quantity of caregiver time addicted to the degree of visual impairment per patient diabetic retinopathy                                                            |                     |                   |                  |
|                                   | mean 5.7 hours a day 5 days a week                                                                                                                                                  |                     |                   |                  |
|                                   | overall amount of <b>US\$ 9572.77</b>                                                                                                                                               | 11,194.40           |                   |                  |
| Keeffe et al. 2009 <sup>23</sup>  | personal out-of-pocket expenses regarding the burden of caregiver                                                                                                                   |                     |                   |                  |
|                                   | median annual opportunity costs for worktime spent on caregiving <b>AUS\$ 915</b>                                                                                                   | 2,244.60            |                   |                  |
| Wong et al. 2008 <sup>34</sup>    | annual median personal costs for informal care and assistance in activities of daily living                                                                                         |                     |                   |                  |
|                                   | e.g. meal preparing, dressing, shopping, transportation <b>AUS\$ 2,911</b>                                                                                                          | 6,451               |                   |                  |
| Lafuma et al. 2006 <sup>25</sup>  | national survey with estimation on costs for time caregiver spent on of low vision and blindness for persons in the community (declared annually per person and total expenditures) |                     |                   |                  |
|                                   | <b>low vision</b>                                                                                                                                                                   | <b>blindness</b>    | <b>low vision</b> | <b>blindness</b> |
|                                   | informal care € 1881.80 pp/ year                                                                                                                                                    | € 7,316.26 pp/ y    | 1,944             | 7,560.48         |
|                                   | € 2,101 million total                                                                                                                                                               | € 424 million total | 2,171 million     | 438 million      |

Formatted: Font: 11 pt

## Indirect costs

Studies of indirect costs demonstrate high expenditures related to productivity losses, changes in employment (employer and/or area of work), loss of income, premature mortality, and dead weight losses (Table 5). Received social allowances were detailed in one study, but not counted towards the overall costs as they were considered transfer costs.[28] One study included the loss of caregivers' time, which is spent on support in terms of productivity loss but also as a loss of personal time and time to engage in leisure activities.[25] Equal to other cost components indirect costs correlated with the degree of visual impairment, with the highest indirect costs reported for blind persons. Compared to all other cost categories indirect costs due to productivity losses, lower employment rates and losses of income in patients as well as caregivers caused the highest economic burden. Annual estimates of productivity losses and absenteeism due to visual impairment and blindness in the USA and Canada range from US\$ PPP 4,974-5,724 million, and are estimated to be US\$ PPP 7,367 million for an overall decrease in workforce participation in the USA (Table 5).

**Table 5: Outcomes Results for indirect costs**

| Study                             | cost outcomes                                                                                                                                                                                                                              | US\$ PPP in 2011      |                   |                  |
|-----------------------------------|--------------------------------------------------------------------------------------------------------------------------------------------------------------------------------------------------------------------------------------------|-----------------------|-------------------|------------------|
| Rein et al. 2006 <sup>29</sup>    | total annual indirect costs caused by visual disorders                                                                                                                                                                                     |                       |                   |                  |
|                                   | decreased work force participation <b>US\$ 6.3 billion</b>                                                                                                                                                                                 | 7,367 million         |                   |                  |
|                                   | decreased wages <b>US\$ 1.73 billion</b>                                                                                                                                                                                                   | 2,023 million         |                   |                  |
| Roberts et al. 2010 <sup>30</sup> | indirect costs for visual impairment and blindness                                                                                                                                                                                         |                       |                   |                  |
|                                   | productivity losses <b>US\$ 4.667 billion</b>                                                                                                                                                                                              | 4,974 million         |                   |                  |
|                                   | lower employment <b>US\$ 4.230 billion</b>                                                                                                                                                                                                 | 4,509 million         |                   |                  |
|                                   | absenteeism <b>US\$ 0.384 billion</b>                                                                                                                                                                                                      | 409 million           |                   |                  |
|                                   | premature mortality <b>US\$ 0.053 billion</b>                                                                                                                                                                                              | 56.5 million          |                   |                  |
| Lafuma et al. 2006 <sup>25</sup>  | national survey with estimation on indirect costs for losses of income in persons with low vision and blindness living in institutions <sup>1</sup> or in the community <sup>2</sup> (declared annually per person and total expenditures) |                       |                   |                  |
|                                   | <b>low vision</b>                                                                                                                                                                                                                          | <b>blindness</b>      | <b>low vision</b> | <b>blindness</b> |
|                                   | losses of incomes <sup>1</sup> € 120.00 pp/y                                                                                                                                                                                               | € 180.00 pp/y         | 124               | 186              |
|                                   | € 10.71 million total                                                                                                                                                                                                                      | € 1.87 million total  | 11.07 million     | 1.93 million     |
|                                   | losses of incomes <sup>2</sup> € 3,912.00 pp/y                                                                                                                                                                                             | € 3,168.00 pp/y       | 4,042             | 3,273            |
|                                   | € 4,369 million total                                                                                                                                                                                                                      | € 183.6 million total | 4,515 million     | 189.72 million   |
| Brezin et al. 2005 <sup>15</sup>  | prevalence and burden of blindness, low vision and visual impairment in the French community (estimation of monthly average value)                                                                                                         |                       |                   |                  |
|                                   | <b>low vision</b>                                                                                                                                                                                                                          | <b>blindness</b>      | <b>low vision</b> | <b>blindness</b> |
|                                   | social allowances € 87                                                                                                                                                                                                                     | € 364                 | 92                | 384              |
|                                   | total household income € 1,525                                                                                                                                                                                                             | € 1,587               | 1,607             | 1,673            |
| household income no VI € 1,851    |                                                                                                                                                                                                                                            | 1,951                 |                   |                  |
| Cruess et al. 2011 <sup>18</sup>  | indirect costs for Canada caused by vision loss                                                                                                                                                                                            |                       |                   |                  |
|                                   | employment participation, absenteeism, presenteeism <b>CAN \$ 4,431 million</b>                                                                                                                                                            | 5,724 million         |                   |                  |
|                                   | dead weight losses <b>CAN\$ 1,757 million</b>                                                                                                                                                                                              | 2,270 million         |                   |                  |

Field Code Changed

Field Code Changed

Formatted: Font: 11 pt

Intangible effects

Most studies used personal burden such as depression, emotional distress, loss of independency, loss of quality of life, limitations in activities of daily living or hazards such as falls and injuries to capture intangible effects of visual impairment and blindness. Two studies, set in Japan and Canada, reported a loss of well being as DALYs and an associated cost of US\$ PPP 51.8 billion and US\$ PPP 15.11 billion per year respectively.[18,30] Every reviewed study reported a high burden caused by multiple individual restrictions in patients and also in caregivers, which was found to be increasing with the degree of visual impairment (Table 6). Mortality associated with visual impairment was reported to increase linearly from 4.5% in persons with normal visual acuity ( $\geq 20/20$ ) to 22.2% in blind persons (visual acuity of  $< 20/200$ ) [26]. Measured as a restriction in care givers, Brezin and colleagues [15] reported a increases from 1.6% of caregivers of non-visually impaired persons, who reported restrictions in going out during the day, up to 12% for caregivers of blind patients.

Field Code Changed

Field Code Changed

Field Code Changed

Field Code Changed

Table 6: [Outcomes-Results](#) for intangible effects

| Study                             | Outcomes                                                                                                                                                                                                                                                                                                                                                     |
|-----------------------------------|--------------------------------------------------------------------------------------------------------------------------------------------------------------------------------------------------------------------------------------------------------------------------------------------------------------------------------------------------------------|
| Bramley et al. 2008 <sup>14</sup> | incidences of depression occur in 17% more than patients with no vision loss, placements in nursing homes are demanded in 25.3% more, injuries happen in 33.4% more cases and femur fractures in 67.4% more cases                                                                                                                                            |
| Cruess et al. 2011 <sup>18</sup>  | loss of well-being and loss in quality of life evokes 77,306 DALYs or rather CAN\$ 11.7 billion in 2007 (US\$ PPP 15.11 billion in 2011)                                                                                                                                                                                                                     |
| Vu et al. 2005 <sup>33</sup>      | non-correctable unilateral vision loss was addicted to independent living and reduced safety; bilateral non-correctable vision loss was associated with nursing homes, emotional wellbeing, use of community services, and activities of daily living                                                                                                        |
| Wood et al. 2006 <sup>35</sup>    | increased visual impairment was significantly associated with an increased incidence of falls and other injuries. 54% of participants had at least one fall, 30% had more than fall, and 63% of falls ended in injuries                                                                                                                                      |
| McCarty et al. 2001 <sup>26</sup> | a linear increase of 5-year mortality correlating with degree of visual impairmen was detected; even mild visual impairment is related to a more than twofold risk of death                                                                                                                                                                                  |
| Brezin et al. 2005 <sup>15</sup>  | burden in patients occurs because of inability to undertake daily activities; need of assistance correlates with degree of visual impairment; burden on caregiver was caused by limited by restricted possibilities for going out for different periods or losing social contacts, affected physical and mental welfare and modified professional activities |
| Porz et al. 2010 <sup>28</sup>    | in a questionnaire with score scale 0-100 points patients with VA $\geq 0.3$ achieved 79.32 for mobility and independency, 69.64 for emotional well-being and 73.86 for reading and achievement of information; persons with VA $< 0.3$ were rated with scores 46.84, 61.43, 44.25 respectively                                                              |
| Roberts et al. 2010 <sup>30</sup> | loss of well-being was measured in DALYs; converted into a monetary value this results in total annual costs of US\$ 48.598 billion (US\$ PPP 51.8 billion in 2011) and costs per capita of US\$ 29,690 per year (US\$ PPP 31,647)                                                                                                                           |
| Frick et al. 2007 <sup>21</sup>   | the cases of blindness and visual impairment more than 209,000 QALY were projected to lost each year, this amounts to a monetary value of US\$ 10,000 million (US\$ PPP 12,150 in 2011)                                                                                                                                                                      |

Formatted: English (U.S.)



1  
2  
3  
4  
5  
6  
7  
8  
9  
10  
11  
12  
13  
14  
15  
16  
17  
18  
19  
20  
21  
22  
23  
24  
25  
26  
27  
28  
29  
30  
31  
32  
33  
34  
35  
36  
37  
38  
39  
40  
41  
42  
43  
44  
45  
46  
47  
48  
49  
50  
51  
52  
53  
54  
55  
56  
57  
58  
59  
60

## DISCUSSION

In this first systematic review of costs associated with visual impairment and blindness we could demonstrate a considerable impact of visual impairment and blindness in terms of the associated direct and indirect costs, as well as intangible effects such as loss of well-being, independence and excess mortality. The highest costs are caused by productivity losses in visually impaired and blind persons as well as their carers, followed by formal and informal care giving, recurrent hospitalizations and the use of medical and supportive services in the visually impaired and blind. A much larger economic impact was due to intangible effects such as loss of independence, quality of life and excess morbidity. However, these are very difficult to quantify in monetary terms and only a small number of studies attempted this. All highlighted cost components as well as intangible effects which contribute to the overall economic impact of visual impairment and blindness need to be considered in economic evaluations not only of visual impairment and blindness but also of interventions aimed at averting these, depending on the focus of the economic evaluation.

A large proportion of the direct costs reported in reviewed studies are not directly related to eye-related medical care, but to falls and other accidents due to visual impairment, exacerbation of diabetes due to a reduced ability to self-manage, depression related to loss of vision and further excess morbidity.<sup>[22]</sup> Drug costs were not a major contributor to overall costs, which is mirrored in studies investigating chronic diseases such as diabetes mellitus, where – despite its ongoing use – hypoglycaemic drugs constitute only a small proportion of overall direct medical costs.<sup>[36]</sup> Annual mean costs of other potentially incapacitating chronic diseases such as diabetes mellitus (Euros 5,262 or USD 6,889) <sup>[36]</sup> or the first year after a stroke (USD -14,361)<sup>[37]</sup> were much lower for diabetes and similar for the stroke estimate compared to mean annual costs of severe visual impairment and blindness.<sup>[14 22]</sup> This is likely due to the average diabetic not requiring professional care giving of a scale required during the first year after a stroke or in severely visually impaired and blind persons. In severely visually impaired or blind persons, however, these costs are incurred every year following the loss of vision, and do not decrease significantly over the following years unlike reported annual costs for stroke.<sup>[37]</sup> Javitt and colleagues report all direct medical cost caused by visual impairment to amount to US\$ 2.14 million in 2003 in all non-institutionalized Medicare beneficiaries 69 years and older, and postulate a much higher cost for the whole of the US population.<sup>[22]</sup> With the introduction of anti-Vascular-Endothelial-Growth-Factor treatment for a number of potentially blinding eye diseases such as neovascular age-related macular degeneration, diabetic macular edema or macular edema in retinal vein occlusions

Field Code Changed

1  
2  
3  
4  
5  
6  
7 since all reviewed studies were conducted, the overall direct medical costs associated with  
8 visual impairment can be expected to be much higher today. This increase in cost is exacer-  
9 bated by the ageing of populations in all developed countries as all major blinding diseases  
10 are age-related.[29]

Field Code Changed

11  
12  
13 Our finding that indirect costs are much higher than direct costs caused by visual impairment  
14 and blindness is mirrored by virtually all other cost-of-illness studies assessing the economic  
15 impact of diseases or impairments which result in absenteeism and reduced ability to work  
16 [38-39]. Back pain, for example, was found to cause considerable absenteeism and disable-  
17 ment, which – despite its significant hospital cost – lead to indirect cost constituting 93% of  
18 the overall cost in 1991 in the Netherlands.[38] Even in treatment and healthcare resource  
19 intensive chronic diseases such as diabetes mellitus, indirect costs pose more than half of  
20 the overall costs caused by the illness.[39]

Formatted: English (U.S.)

Formatted: English (U.S.)

Field Code Changed

Field Code Changed

21  
22  
23  
24  
25 All studies which assessed intangible effects in economic terms reported these to be the  
26 largest contributor to the overall economic impact of visual impairment and blindness. Con-  
27 sidering the adverse impact of losing vision on quality of life, independence and the ability  
28 to participate in society, this is not surprising. We and others have previously reported that  
29 even mild visual impairment (0.3<LogMAR<0.5) has a significant and independent impact on  
30 vision-specific functioning.[40-42] Similarly, emotional well-being is affected in patients with  
31 even mild vision impairment.[41] Depression is considered to result in further functional de-  
32 cline in this group by reducing motivation, initiative and resiliency. [43-45] and people with  
33 depression are less likely to access vision rehabilitation services than those not  
34 depressed.[44-45] Even unilateral vision loss had a measurable impact on falling and some  
35 other activities of independent living, with increased odds of having problems in many activi-  
36 ties of daily life in the a study conducted by Vu and colleagues.[33] All this very adversely  
37 impacts the ability to participate in society, and contributes to the considerable economic  
38 impact of intangible effects caused by visual impairment and blindness.

Field Code Changed

Field Code Changed

Field Code Changed

Formatted: Font: 11 pt

Field Code Changed

Formatted: Font: 11 pt

Formatted: English (U.S.)

Formatted: Font: 11 pt

Field Code Changed

Formatted: Font: 11 pt

Field Code Changed

Formatted: Font: 11 pt

Formatted: Font: 11 pt

Field Code Changed

Formatted: Font: 11 pt

Formatted: Font: 11 pt

Field Code Changed

39  
40  
41  
42  
43  
44  
45 There are several limitations which necessitate a careful interpretation of the overall findings.  
46 Using key words to identify relevant literature always bears the potential of a too narrow fo-  
47 cus, and not all relevant literature may have been included. As we were interested in the  
48 economic burden of VI&B in high-income countries, we did not include (uncorrected) refrac-  
49 tive error into our search terms as this is mostly a problem of middle- and low-income coun-  
50 tries, and excluded studies conducted in middle- and low-income countries which limits our  
51 results to high-income countries. However, based on the searches conducted, as well as  
52 the cross-searching performed based on references, the authors are confident that the vast  
53  
54  
55

1  
2  
3  
4  
5  
6  
7  
8  
9  
10  
11  
12  
13  
14  
15  
16  
17  
18  
19  
20  
21  
22  
23  
24  
25  
26  
27  
28  
29  
30  
31  
32  
33  
34  
35  
36  
37  
38  
39  
40  
41  
42  
43  
44  
45  
46  
47  
48  
49  
50  
51  
52  
53  
54  
55  
56  
57  
58  
59  
60

majority of relevant literature could be included. To the authors' knowledge, a standardized quality checklist has not been used to assess economic evaluations of the impact of visual impairment and blindness prior to inclusion into a systematic review to date. This further increases the overall quality of our review. The study synthesis of reviewed literature was limited as no two studies used the same methodology, [particularly lacking a standardized definition and specification of cost components \(see Appendix 2\)](#). Furthermore no two studies reported exactly the same outcomes or used the same sample population. These problems have been reported for cost-of-illness - or in this case cost-of-impairment - studies in other areas, and adherence to existing cost-of-illness study guidelines recommended.<sup>[11, 12, 46]</sup> Unfortunately, none of the reviewed studies seem to have adhered to any of the available international standards, and thus the overall comparability is limited. Similar to cost-of-illness studies in other areas, studies are summarized mostly descriptively, or at a high level of aggregation.<sup>[11]</sup> The same applies to the chosen categories of visual impairment used in all studies which differ considerably [and further limit our ability to collate results \(Table 1\)](#). The perspective (affected person, healthcare payer, societal) of the study was only described in a minority of [reports studies](#), and as highlighted in the results section, most studies were conducted in the USA and Australia, making inferences to other countries and healthcare systems difficult. However, this is the only systematic review of the economic impact of visual impairment and blindness to date, highlighting the very broad economic impact and outlining the considerable scope a comprehensive economic evaluation in this area should ideally have.

In conclusion, visual impairment and blindness cause a considerable economic burden for affected persons, their care givers and society at large, which increases with the degree of visual impairment for all assessed cost categories as well as intangible effects. This review highlights a large amount of cost categories which should be considered in economic evaluations in eye health, and future cost-of illness or cost-of-impairment studies should adhere to available guidelines to improve comparability. The review highlights the considerable amount of resources spent on caring for visually impaired and blind persons in the absence of a cure.

## FINANCIAL DISCLOSURE

The study was supported by the German Research Council (DFG FI 1540/5-5, grant to RPF), by an unconditional grant from Novartis Pharma Germany and by the Australian National Health and Medical Research Council Centre for Clinical Research Excellence #529923 - Translational Clinical Research in Major Eye Diseases. CERA receives Operational Infra-

22

Field Code Changed

Field Code Changed

Field Code Changed

Field Code Changed

1  
2  
3  
4  
5  
6  
7 structure Support from the Victorian Government. The funders had no role in study design,  
8 data collection and analysis, decision to publish, or preparation of the manuscript.  
9

## 10 11 COMPETING INTERESTS

12  
13 Authors declared that there are no competing interests.  
14

## 15 16 17 AUTHORS' CONTRIBUTION

18 All authors contributed to the design of the review, KB and CS searched databases and ex-  
19 tracted references, KB, CS and JK collated studies, and KB, JK and RF drafted the manu-  
20 script, all authors critically revised the manuscript.  
21  
22  
23  
24

## 25 26 REFERENCES

27  
28  
29  
30  
31  
32  
33  
34  
35  
36  
37  
38  
39  
40  
41  
42  
43  
44  
45  
46  
47  
48  
49  
50  
51  
52  
53  
54  
55  
56  
57  
58  
59  
60

1  
2  
3  
4  
5  
6  
7  
8  
9  
10  
11  
12  
13  
14  
15  
16  
17  
18  
19  
20  
21  
22  
23  
24  
25  
26  
27  
28  
29  
30  
31  
32  
33  
34  
35  
36  
37  
38  
39  
40  
41  
42  
43  
44  
45  
46  
47  
48  
49  
50  
51  
52  
53  
54  
55  
56  
57  
58  
59  
60

1. Finger RP FR, Holz FG, Scholl HP. Incidence of Blindness and Severe Visual Impairment\* in Germany: Projections for 2030. Invest Ophthalmol Vis Sci 2011
2. Murray CJ VT, Lozano R, Naghavi M, Flaymann AD, Michaud C, et al. Disability-adjusted life years (DALYs) for 291 diseases and injuries in 21 regions, 1990-2010: a systematic analysis for the Global Burden of Disease Study 2010. Lancet 2012;**380**(9859):2197-223
3. Williams RA TR, Kaplan RM, Brown SI. The psychological impact of macular degeneration. Archives of Ophthalmology 1998;**116**(4):514-20
4. Taylor HR, Pezzullo ML, Keffee JE. The economic impact and cost of visual impairment in Australia. British Journal of Ophthalmology 2006;**90**(3):272-5
5. Drummond MF. *Methods for the economic evaluation of health care programmes*. 3 ed. Oxford: Oxford University Press, 2005.
6. Luce BR, Anne E. Estimating costs in the economic evaluation of medical technologies. International Journal of Technology Assessment in Health Care 1990(6):57-75
7. Ament AES. Cost of illness studies in health care: a comparison of two cases. Health policy (Amsterdam, Netherlands) 1993(26)
8. Emmert M, Huber M, Schöffski O. Eine Aggregation von Instrumenten zur Qualitätsbewertung gesundheitsökonomischer Evaluationsstudien. PharmacoEconomics 2011(9):11-30
9. Brennan RL, Prediger DJ. Coefficient Kappa: Some uses, misuses, and alternatives. 1981(41):687-99
10. Landis JR, Koch GG. The measurement of observer agreement for categorical data. Biometrics 1977(33):159-74
11. The World Bank: GDP deflator - World development Indicators. Access date: 2013-04-08  
Secondary The World Bank: GDP deflator - World development Indicators. Access date: 2013-04-08 2013. <http://data.worldbank.org/indicator/NY.GDP.DEFL.KD.ZG/countries>.
12. Frick KK, S. Lee, P. Matchar, D. Pezzullo, L. Rein, B. Taylor, H. The cost of visual impairment: purposes, perspectives and guidance. Investigative Ophthalmology & Visual Science 2010;**51**(4):1801-05
13. OECD. Health policies and data: OECD Health Data 2012, 2012.
14. Bramley T, Peeples P, Walt JG, et al. Impact of vision loss on costs and outcomes in medicare beneficiaries with glaucoma. Archives of ophthalmology 2008;**126**(6):849-56 doi: 10.1001/archoph.126.6.849[published Online First: Epub Date]].

Formatted: Font: 11 pt

Formatted: Indent: Left: 0", First line: 0",  
Line spacing: 1.5 lines

- 1  
2  
3  
4  
5  
6  
7  
8  
9  
10  
11  
12  
13  
14  
15  
16  
17  
18  
19  
20  
21  
22  
23  
24  
25  
26  
27  
28  
29  
30  
31  
32  
33  
34  
35  
36  
37  
38  
39  
40  
41  
42  
43  
44  
45  
46  
47  
48  
49  
50  
51  
52  
53  
54  
55  
56  
57  
58  
59  
60
15. Brézin AP, Lafuma A, Fagnani F, et al. Prevalence and burden of self-reported blindness, low vision, and visual impairment in the french community: A nationwide survey. *Archives of Ophthalmology* 2005;**123**(8):1117–24 doi: 10.1001/archophth.123.8.1117[published Online First: Epub Date]].
  16. Chou S-L, Lamoureux E, Keeffe J. Methods for measuring personal costs associated with vision impairment. *Ophthalmic epidemiology* 2006;**13**(6):355–63 doi: 10.1080/09286580600966623[published Online First: Epub Date]].
  17. Clarke P, Gray A, Legood R, et al. The impact of diabetes-related complications on healthcare costs: results from the United Kingdom Prospective Diabetes Study (UKPDS Study No. 65). *Diabetic medicine : a journal of the British Diabetic Association* 2003;**20**(6):442–50
  18. Cruess AF, Gordon KD, Bellan L, et al. The cost of vision loss in Canada. 2. Results. *Canadian journal of ophthalmology* 2011;**46**(4):315–18 doi: 10.1016/j.jcjo.2011.06.006[published Online First: Epub Date]].
  19. Gordon KD, Cruess AF, Bellan L, et al. The cost of vision loss in Canada. 1. Methodology. *Canadian journal of ophthalmology* 2011;**46**(4):310–14 doi: 10.1016/j.jcjo.2011.07.001[published Online First: Epub Date]].
  20. Frick KD, Walt JG, Chiang TH, et al. Direct costs of blindness experienced by patients enrolled in managed care. *Ophthalmology* 2008;**115**(1):11–17 doi: 10.1016/j.ophtha.2007.02.007[published Online First: Epub Date]].
  21. Frick KG, E.W. Kempen, J.H. Wolff, J. Economic Impact of visual impairment and blindness in the United States. *Arch Ophthalmol* 2007;**125**:544-50
  22. Javitt JC, Zhou Z, Willke RJ. Association between vision loss and higher medical care costs in Medicare beneficiaries costs are greater for those with progressive vision loss. *Ophthalmology* 2007;**114**(2):238–45 doi: 10.1016/j.ophtha.2006.07.054[published Online First: Epub Date]].
  23. Keeffe JE, Chou S-L, Lamoureux EL. The cost of care for people with impaired vision in Australia. *Archives of ophthalmology* 2009;**127**(10):1377–81 doi: 10.1001/archophthalmol.2009.242[published Online First: Epub Date]].
  24. Kymes SM, Plotzke MR, Li JZ, et al. The increased cost of medical services for people diagnosed with primary open-angle glaucoma: a decision analytic approach. *American journal of ophthalmology* 2010;**150**(1):74–81 doi: 10.1016/j.ajo.2010.01.037[published Online First: Epub Date]].

1  
2  
3  
4  
5  
6  
7  
8  
9  
10  
11  
12  
13  
14  
15  
16  
17  
18  
19  
20  
21  
22  
23  
24  
25  
26  
27  
28  
29  
30  
31  
32  
33  
34  
35  
36  
37  
38  
39  
40  
41  
42  
43  
44  
45  
46  
47  
48  
49  
50  
51  
52  
53  
54  
55  
56  
57  
58  
59  
60

25. Lafuma A, Brezin A, Fagnani F, et al. Nonmedical economic consequences attributable to visual impairment. *The European Journal of Health Economics* 2006;**7**(3):158–64 doi: 10.1007/s10198-006-0346-1[published Online First: Epub Date]].
26. McCarty CA, Nanjan MB, R TH. Vision impairment predicts 5 year mortality. *British Journal of Ophthalmology* 2001;**85**(3):322–26 doi: 10.1136/bjo.85.3.322[published Online First: Epub Date]].
27. Morse AR, Yatzkan E, Berberich B, et al. Acute care hospital utilization by patients with visual impairment. *Archives of ophthalmology* 1999;**117**(7):943–49
28. Porz G, Scholl HPN, Holz FG, et al. Methoden zur Ermittlung persönlicher Krankheitskosten am Beispiel retinaler Erkrankungen. *Der Ophthalmologe* 2010;**107**(3):216–22 doi: 10.1007/s00347-009-2036-8[published Online First: Epub Date]].
29. Rein DB, Zhang P, E WK, et al. The economic burden of major adult visual disorders in the united states. *Archives of Ophthalmology* 2006;**124**(12):1754–60 doi: 10.1001/archophth.124.12.1754[published Online First: Epub Date]].
30. Roberts CB, Hiratsuka Y, Yamada M, et al. Economic cost of visual impairment in Japan. *Archives of ophthalmology* 2010;**128**(6):766–71 doi: 10.1001/archophth.2010.86[published Online First: Epub Date]].
31. Schmier JK, Covert DW, Matthews GP, et al. Impact of visual impairment on service and device use by individuals with diabetic retinopathy. *Disability and rehabilitation* 2009;**31**(8):659–65 doi: 10.1080/09638280802239391[published Online First: Epub Date]].
32. Schmier JK, Halpern MT, Covert D, et al. Impact of visual impairment on use of caregiving by individuals with age-related macular degeneration. *Retina (Philadelphia, Pa)* 2006;**26**(9):1056–62 doi: 10.1097/01.iae.0000254890.48272.5a[published Online First: Epub Date]].
33. Vu HTV, Keeffe JE, McCarty CA, et al. Impact of unilateral and bilateral vision loss on quality of life. *British Journal of Ophthalmology* 2005;**89**(3):360–63 doi: 10.1136/bjo.2004.047498[published Online First: Epub Date]].
34. Wong EYH, Chou S-L, Lamoureux EL, et al. Personal costs of visual impairment by different eye diseases and severity of visual loss. *Ophthalmic epidemiology* 2008;**15**(5):339–44 doi: 10.1080/09286580802227394[published Online First: Epub Date]].
35. Wood JM, Lacherez P, Black AA, et al. Risk of falls, injurious falls, and other injuries resulting from visual impairment among older adults with age-related macular degeneration. *Investigative ophthalmology & visual science* 2011;**52**(8):5088–92 doi: 10.1167/iovs.10-6644[published Online First: Epub Date]].



- 1  
2  
3  
4  
5  
6  
7  
8  
9  
10  
11  
12  
13  
14  
15  
16  
17  
18  
19  
20  
21  
22  
23  
24  
25  
26  
27  
28  
29  
30  
31  
32  
33  
34  
35  
36  
37  
38  
39  
40  
41  
42  
43  
44  
45  
46  
47  
48  
49  
50  
51  
52  
53  
54  
55  
56  
57  
58  
59  
60
36. Koster I, von Ferber L, Ihle P, et al. The cost burden of diabetes mellitus: the evidence from Germany--the CoDiM study. *Diabetologia* 2006;**49**(7):1498-504 doi: 10.1007/s00125-006-0277-5[published Online First: Epub Date]].
37. Dewey HM, Thrift AG, Mihalopoulos C, et al. Cost of stroke in Australia from a societal perspective: results from the North East Melbourne Stroke Incidence Study (NEMESIS). *Stroke* 2001;**32**(10):2409-16
38. van Tulder MW, Koes BW, Bouter LM. A cost-of-illness study of back pain in The Netherlands. *Pain* 1995;**62**(2):233-40
39. Henriksson F, Jonsson B. Diabetes: the cost of illness in Sweden. *J Intern Med* 1998;**244**(6):461-8
40. Finger RP, Fenwick E, Chiang PP, et al. The impact of the severity of vision loss on vision-specific functioning in a German outpatient population - an observational study. *Graefes Arch Clin Exp Ophthalmol* 2011;**249**(8):1245-53 doi: 10.1007/s00417-011-1646-4[published Online First: Epub Date]].
41. Finger RP, Fenwick E, Marella M, et al. The impact of vision impairment on vision-specific quality of life in Germany. *Invest Ophthalmol Vis Sci* 2011;**52**(6):3613-9 doi: iovs.10-7127 [pii].10.1167/iov.10-7127[published Online First: Epub Date]].
42. Lamoureux EL, Chong E, Wang JJ, et al. Visual impairment, causes of vision loss, and falls: the singapore malay eye study. *Invest Ophthalmol Vis Sci* 2008;**49**(2):528-33 doi: 49/2/528 [pii] 10.1167/iov.07-1036[published Online First: Epub Date]].
43. Rovner BW, Casten RJ, Tasman WS. Effect of depression on vision function in age-related macular degeneration. *Archives of Ophthalmology* 2002;**120**(8):1041-44
44. Tolman J, Hill RD, Kleinschmidt JJ, et al. Psychosocial adaptation to visual impairment and its relationship to depressive affect in older adults with age-related macular degeneration. *Gerontologist* 2005;**45**(6):747-53
45. Horowitz A, Reinhardt JP, Boerner K, et al. The influence of health, social support quality and rehabilitation on depression among disabled elders. *Aging & Mental Health* 2003;**7**(5):342-50
46. Bloom BS, Bruno DJ, Maman DY, et al. Usefulness of US cost-of-illness studies in healthcare decision making. *PharmacoEconomics* 2001;**19**(2):207-13
47. Moher D, Liberati A, Tetzlaff J, et al. Preferred reporting items for systematic reviews and meta-analyses: the PRISMA statement. *PLoS Medicine* 2006; **6**(7): e1000097



1  
2  
3  
4  
5  
6  
7  
8  
9  
10  
11  
12  
13  
14  
15  
16  
17  
18  
19  
20  
21  
22  
23  
24  
25  
26  
27  
28  
29  
30  
31  
32  
33  
34  
35  
36  
37  
38  
39  
40  
41  
42  
43  
44  
45  
46  
47  
48  
49  
50  
51  
52  
53  
54  
55  
56  
57  
58  
59  
60

|

For peer review only



1  
2  
3  
4  
5  
6  
7  
8  
9  
10  
11  
12  
13  
14  
15  
16  
17  
18  
19  
20  
21  
22  
23  
24  
25  
26  
27  
28  
29  
30  
31  
32  
33  
34  
35  
36  
37  
38  
39  
40  
41  
42  
43  
44  
45  
46  
47  
48  
49  
50  
51  
52  
53  
54  
55  
56  
57  
58  
59  
60

## FIGURES

Figure 1: ~~Inclusion of articles~~ [Flow chart of the literature search](#)

Figure 2: Quality rating of included studies

Figure 3: Kappa-index per study

1  
2  
3  
4  
5  
6  
7  
8  
9  
10  
11  
12  
13  
14  
15  
16  
17  
18  
19  
20  
21  
22  
23  
24  
25  
26  
27  
28  
29  
30  
31  
32  
33  
34  
35  
36  
37  
38  
39  
40  
41  
42  
43  
44  
45  
46  
47  
48  
49  
50  
51  
52  
53  
54  
55  
56  
57  
58  
59  
60

APPENDIX

Appendix 1: Quality checklist

Appendix 2: Cost categories reported in included studies.

[Appendix 3: PRISMA Statement checklist](#)

Formatted: Normal

For peer review only
